# Supplementary material
Source: PubMed Central journal article supplement (PMC6317478)

# Individual MS2 spectra for proteins identified with single unique peptide

Sequence: LQFACDLLQK, L1-Formyl (27.99492 Da), C5-Carbamidomethyl (57.02146 Da)  
Charge: +2, Monoisotopic m/z: 632.32404 Da (+0.31 mmu/+0.48 ppm), MH+: 1263.64079 Da, RT: 162.0007 min,  
Identified with: Sequest HT (v1.17); XCorr:3.54, Percolator q-Value:0.000195, Percolator PEP: 0.000444, Ions matched by search engine: 0/0  
Fragment match tolerance used for search: 0.02 Da

Accession:  
cds.comp36671\_c0\_seq3\_m.252774

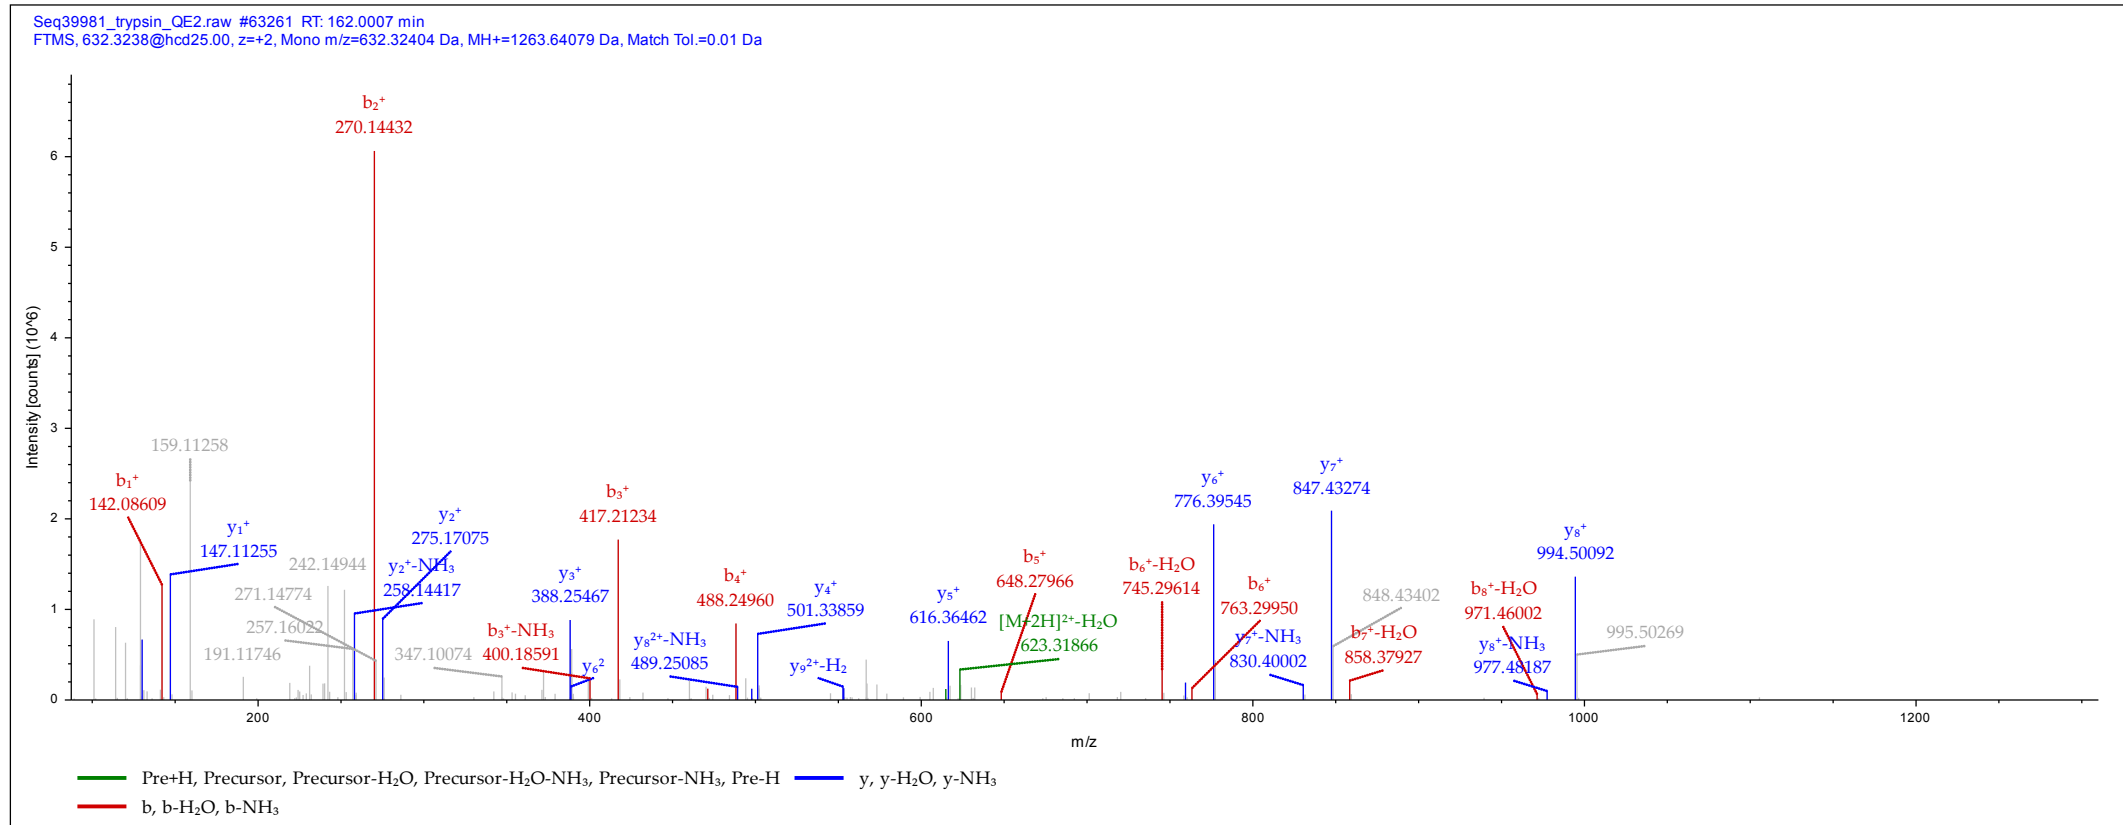

Sequence: SVSEPF<sub>A</sub>HHR, Charge: +2, Monoisotopic m/z: 583.79010 Da (+1.4 mmu/+2.39 ppm), MH<sup>+</sup>: 1166.57292 Da, RT: 17.4341 min, Identified with: Sequest HT (v1.17); XCorr:3.25, Percolator q-Value:0, Percolator PEP:0.00175, Ions matched by search engine: 0/0  
 Fragment match tolerance used for search: 0.5 Da

Accession:  
 cds.comp40672\_c6\_seq2\_m.593234

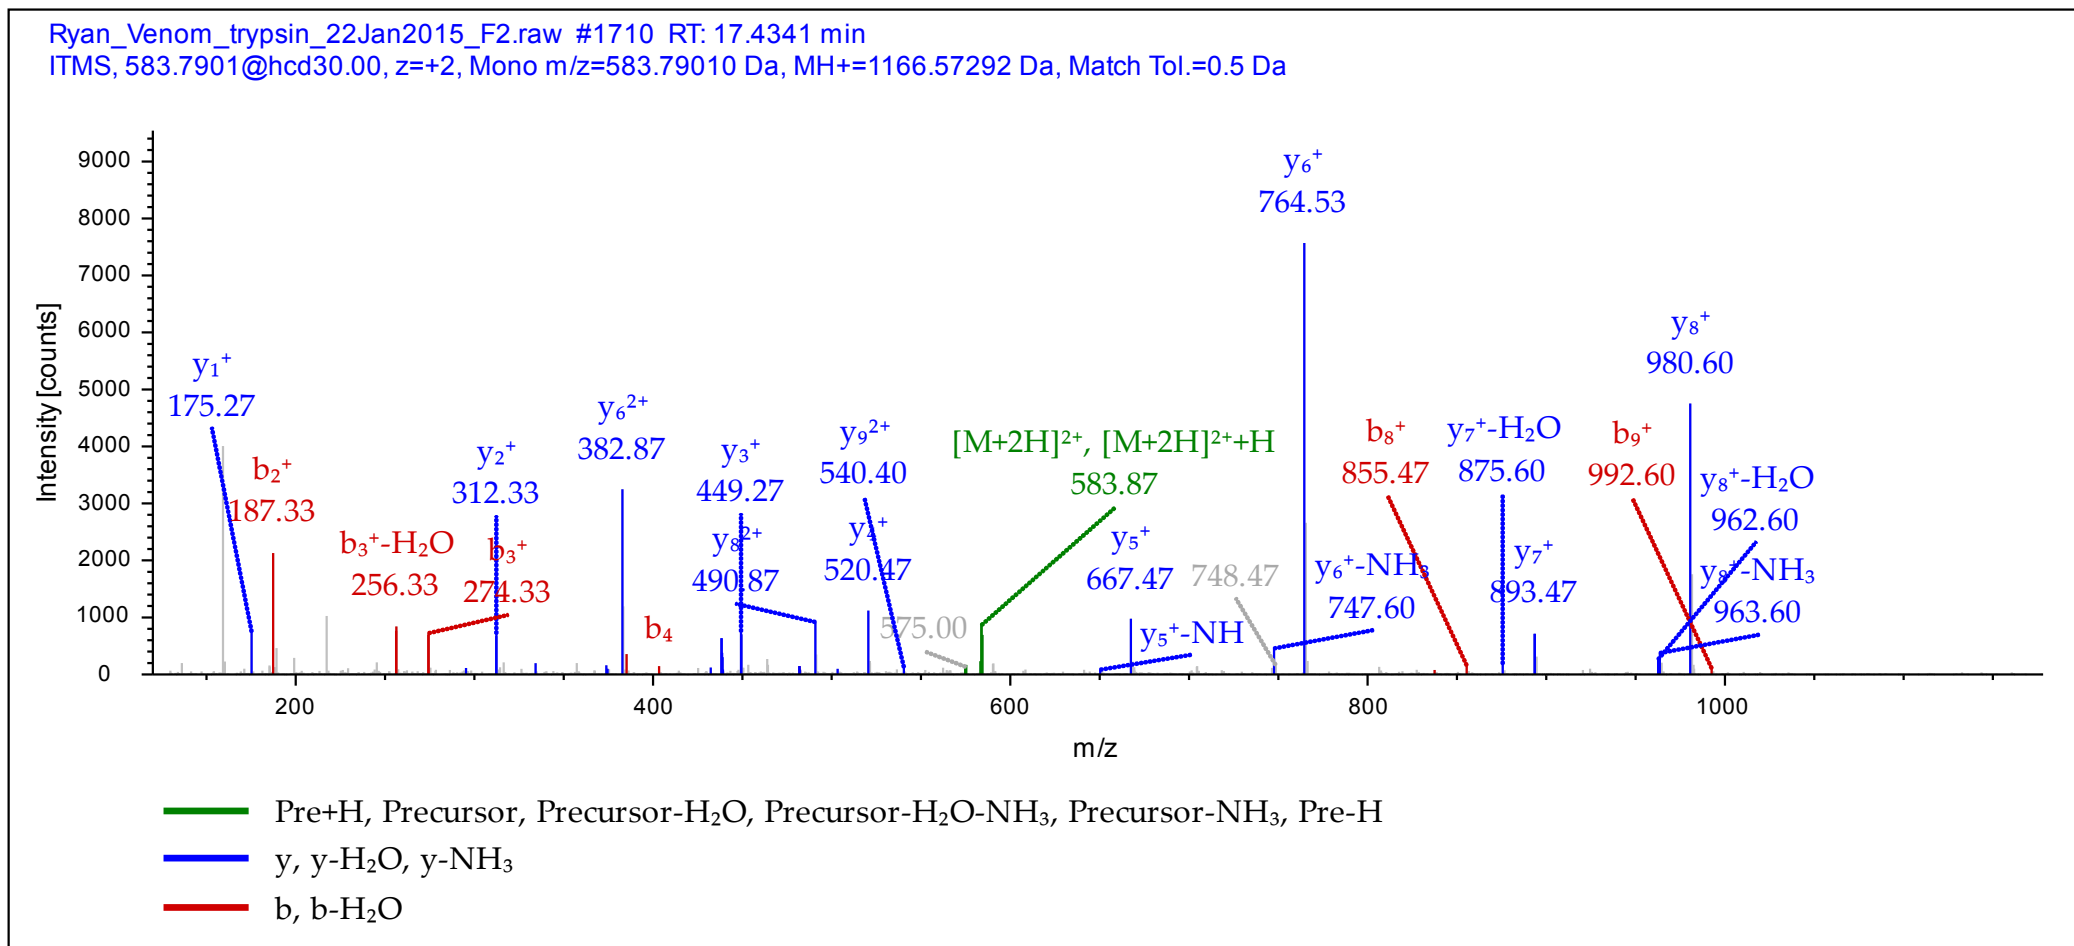



Sequence: SLSFGSDAPTSADSHDSPR, Charge: +3, Monoisotopic m/z: 664.29565  
 Da (-0.43 mmu/-0.65 ppm), MH+: 1990.87241 Da, RT: 57.3645 min,  
 Identified with: Sequest HT (v1.17); XCorr:3.27, Percolator q-Value:0.000122,  
 Percolator PEP:0.00028, Ions matched by search engine: 0/0  
 Fragment match tolerance used for search: 0.02 Da

Accession:  
 cds.comp38228\_c0\_seq2\_m.325571

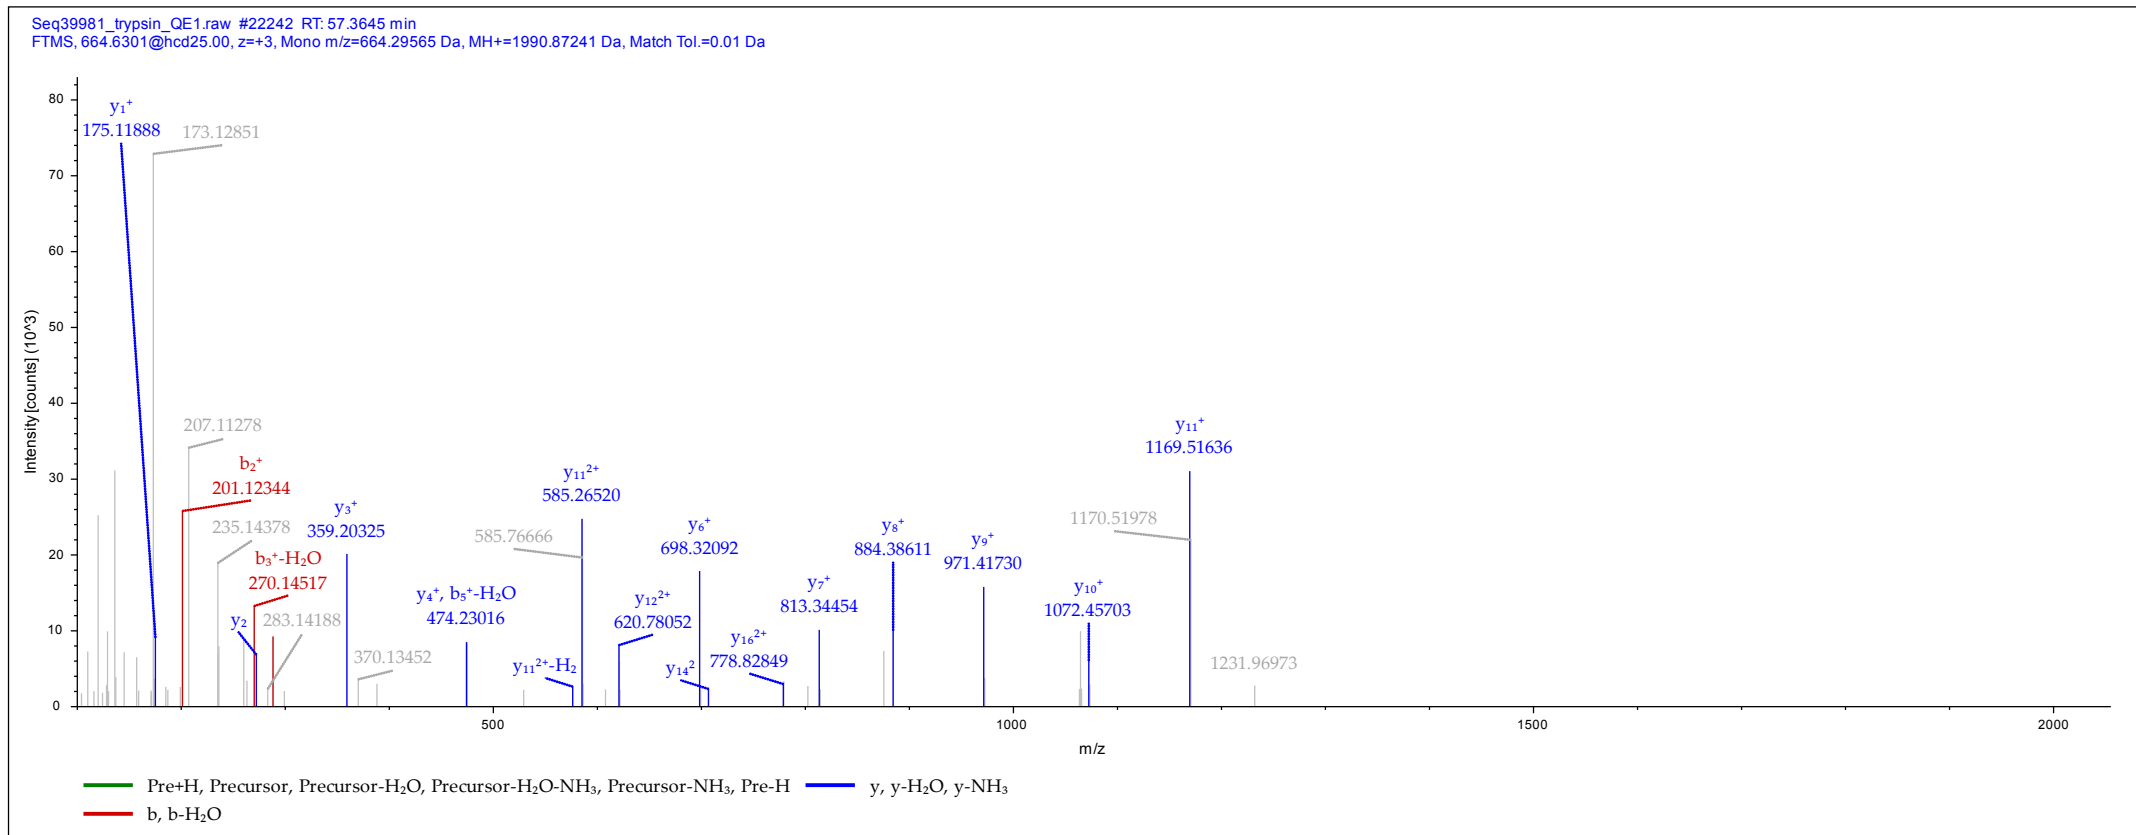

Sequence: AGLQFPVGR, Charge: +2, Monoisotopic m/z: 472.77054 Da (+1.29 mmu/+2.72 ppm), MH+: 944.53380 Da, RT: 24.7749 min, Identified with: Sequest HT (v1.17); XCorr:3.22, Percolator q-Value:0.000888, Percolator PEP: 0.0181, Ions matched by search engine: 0/0  
 Fragment match tolerance used for search: 0.5 Da

Accession:  
 cds.comp41988\_c0\_seq1\_m.808489

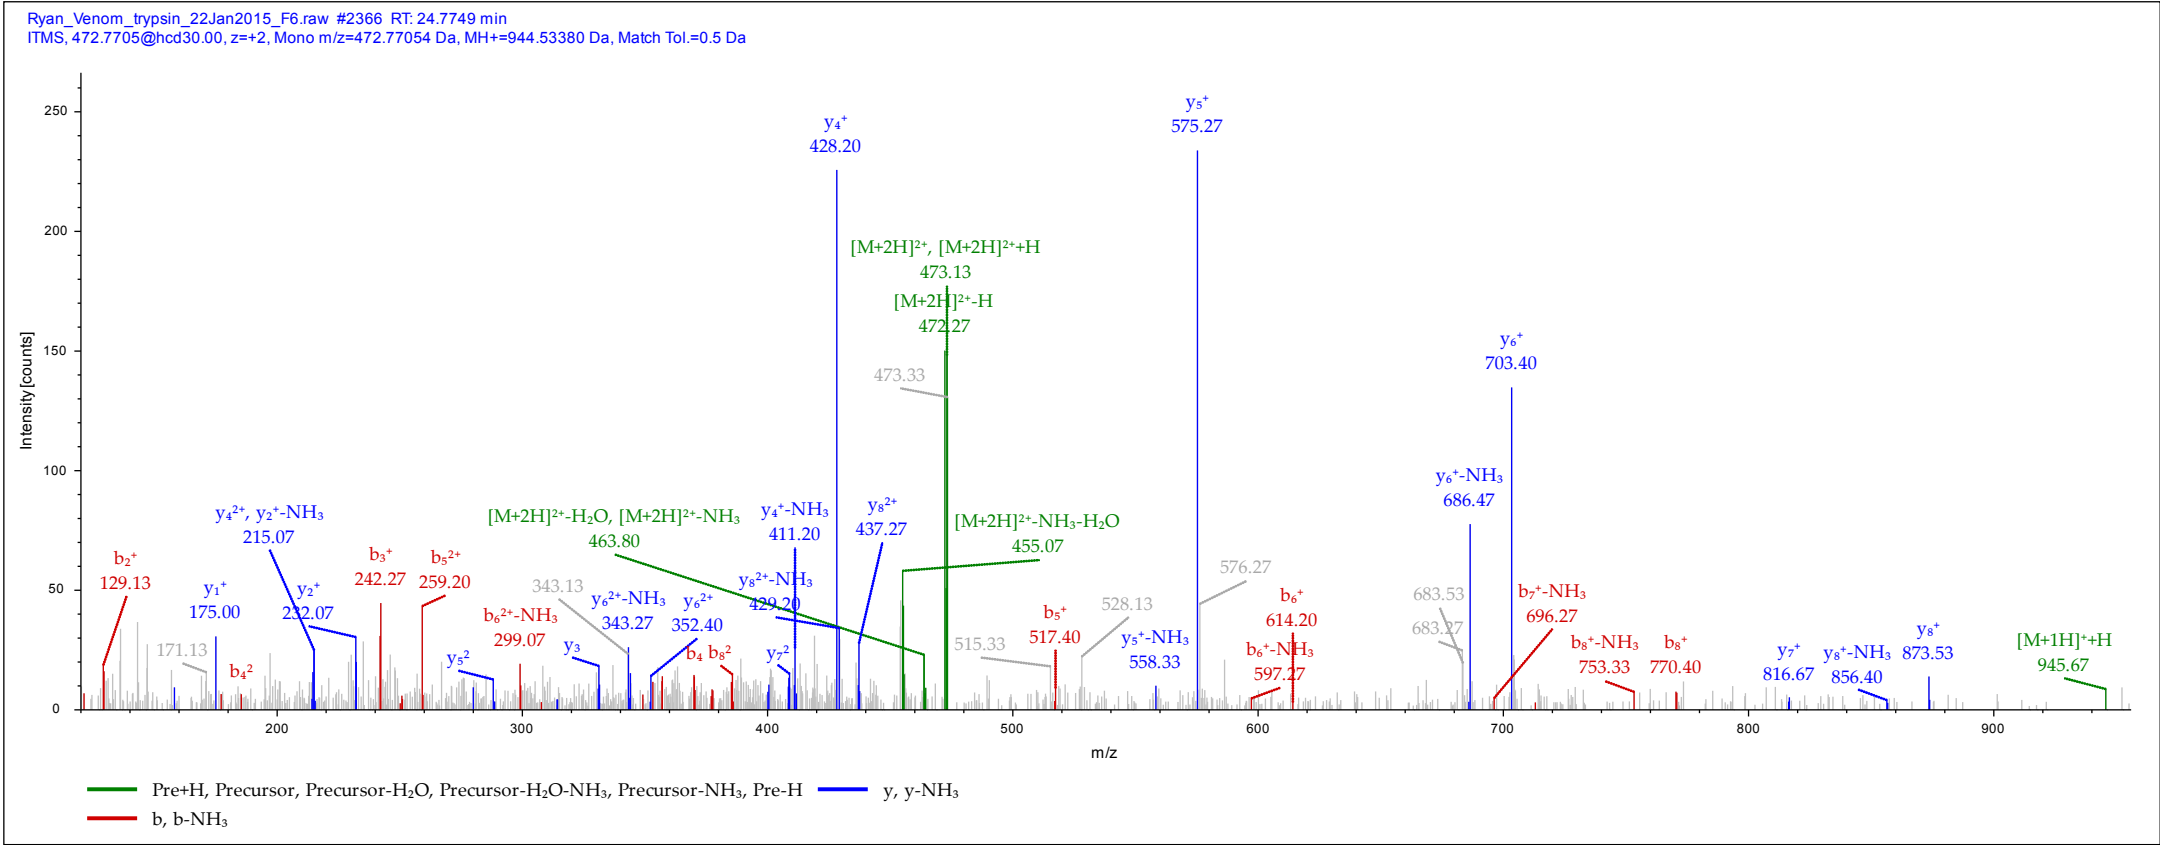

Sequence: AGLQFPVGR, Charge: +2, Monoisotopic m/z: 472.77054 Da  
 (+1.29 mmu/+2.72 ppm), MH+: 944.53380 Da, RT: 24.7749 min,  
 Identified with: Sequest HT (v1.17); XCorr:3.22, Percolator q-Value:  
 0.000888, Percolator PEP:0.0181, Ions matched by search engine: 0/0  
 Fragment match tolerance used for search: 0.5 Da

Accession:  
 cds.comp39051\_c0\_seq2\_m.375858

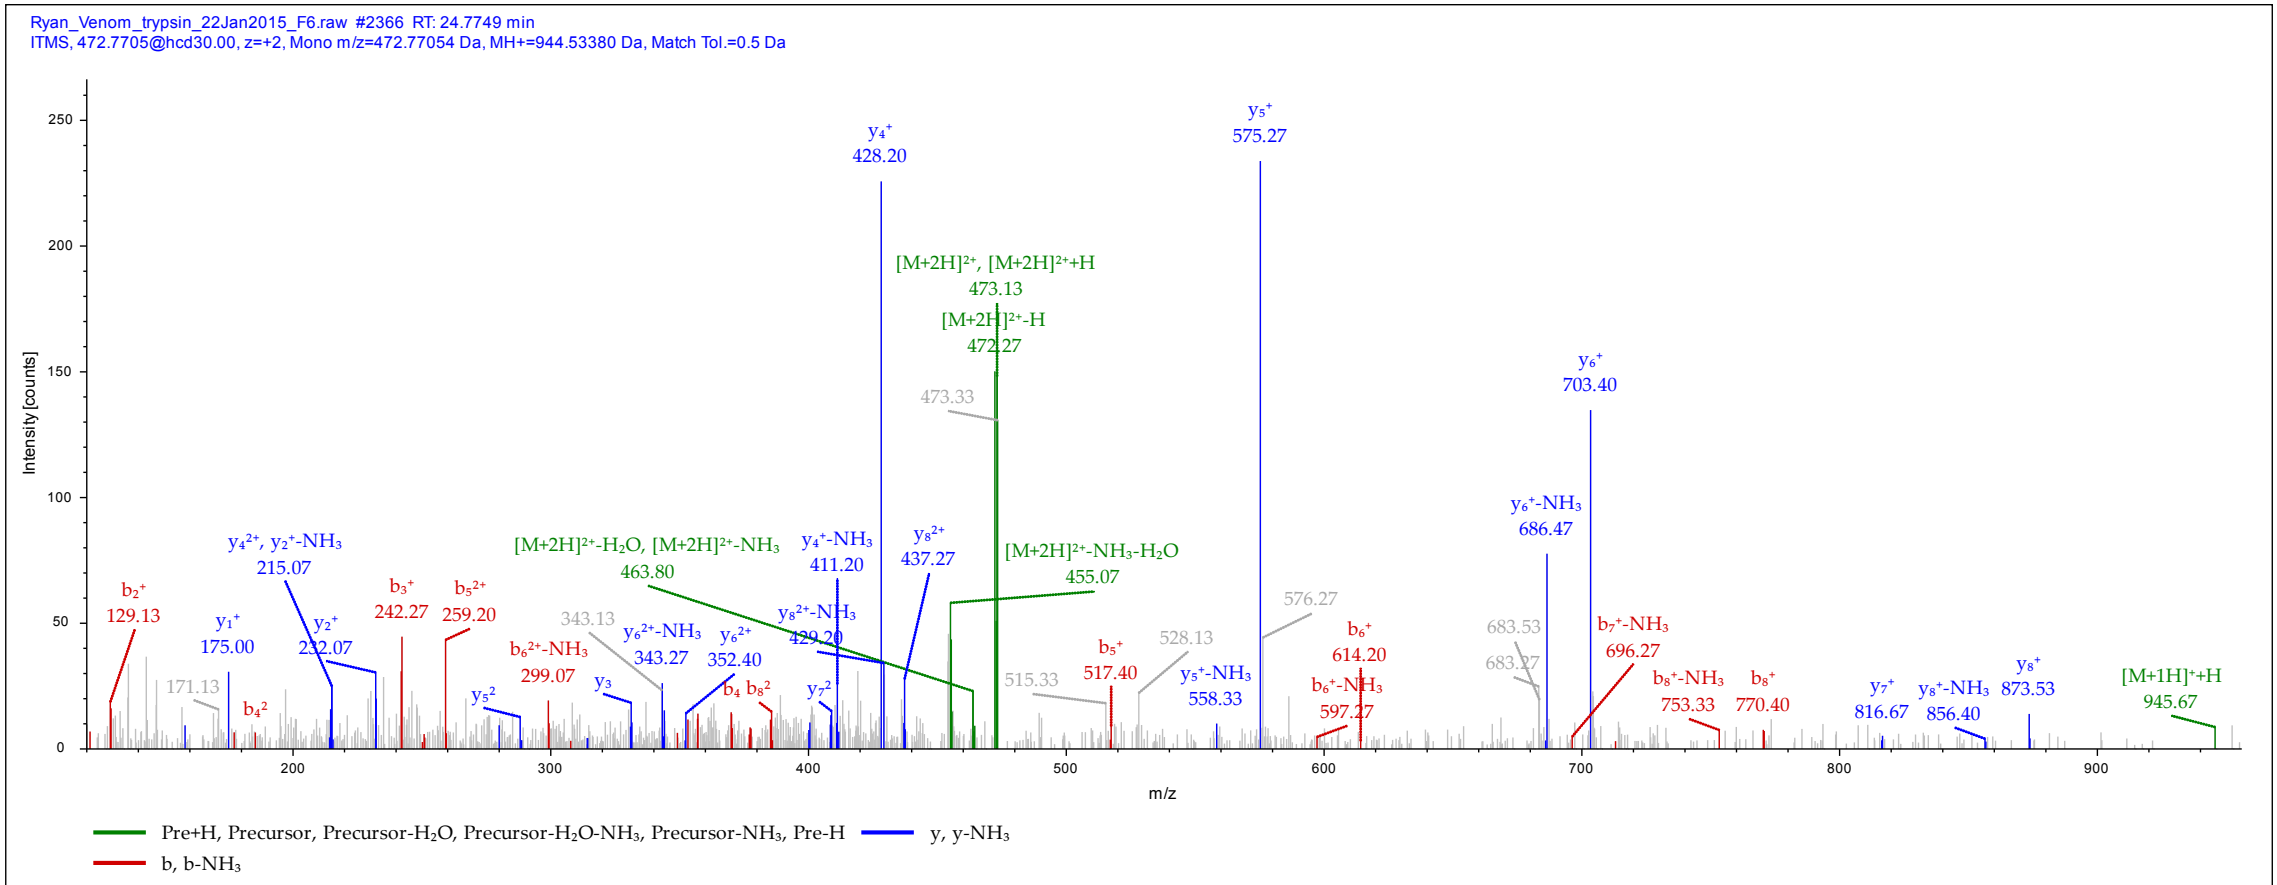

Sequence: VVTPPIEDLTVVGTYIAR, Charge: +3, Monoisotopic m/z: 648.36383 Da  
 (-2.62 mmu/-4.05 ppm), MH+: 1943.07694 Da, RT: 160.2785 min,  
 Identified with: Sequest HT (v1.17); XCorr:2.83, Percolator q-Value:0.000195,  
 Percolator PEP:0.0006, Ions matched by search engine: 0/0  
 Fragment match tolerance used for search: 0.02 Da

Accession:  
 cds.comp39659\_c0\_seq1\_m.428627

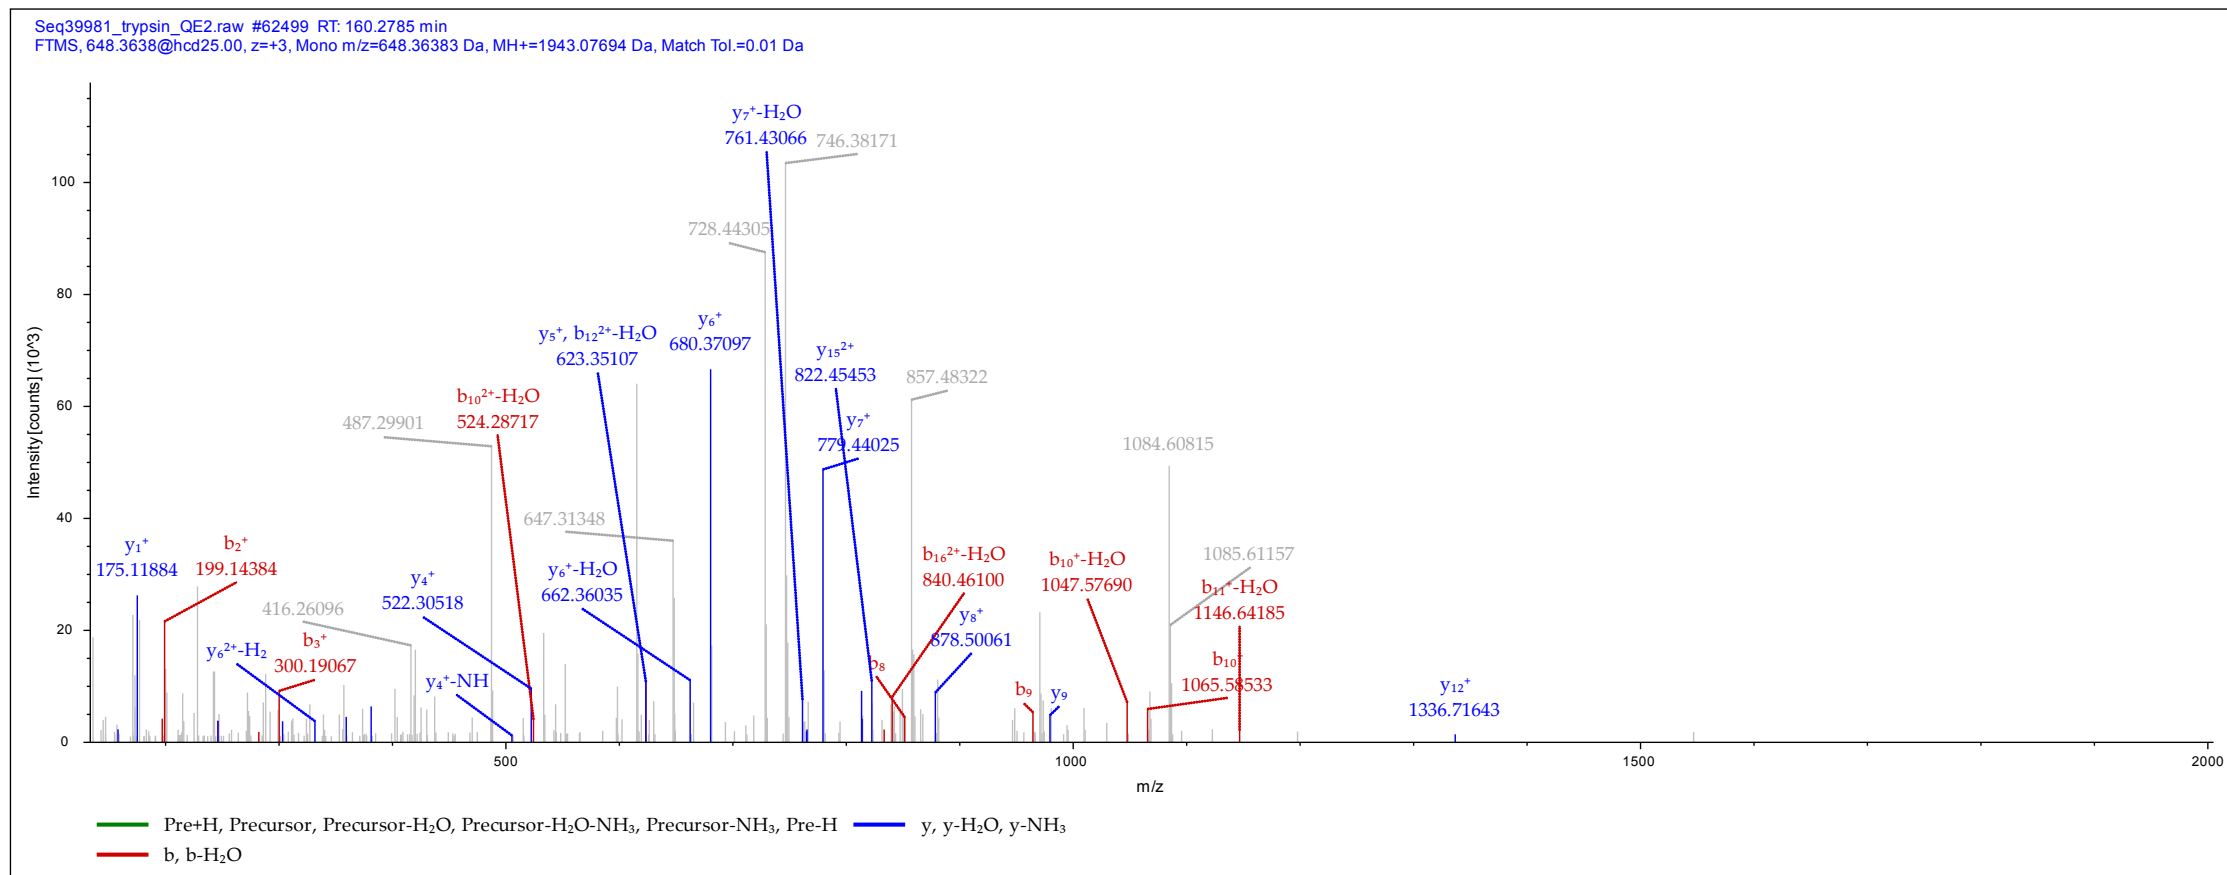

Sequence: NSISGGVNPSGFLR, Charge: +2, Monoisotopic m/z: 702.86566 Da (+0.52 mmu/  
 +0.74 ppm), MH+: 1404.72405 Da, RT: 107.6904 min,  
 Identified with: Sequest HT (v1.17); XCorr:3.48, Percolator q-Value:0, Percolator PEP:  
 0.000109, Ions matched by search engine: 0/0  
 Fragment match tolerance used for search: 0.02 Da

Accession:  
 cds.comp41289\_c0\_seq16\_m.787878

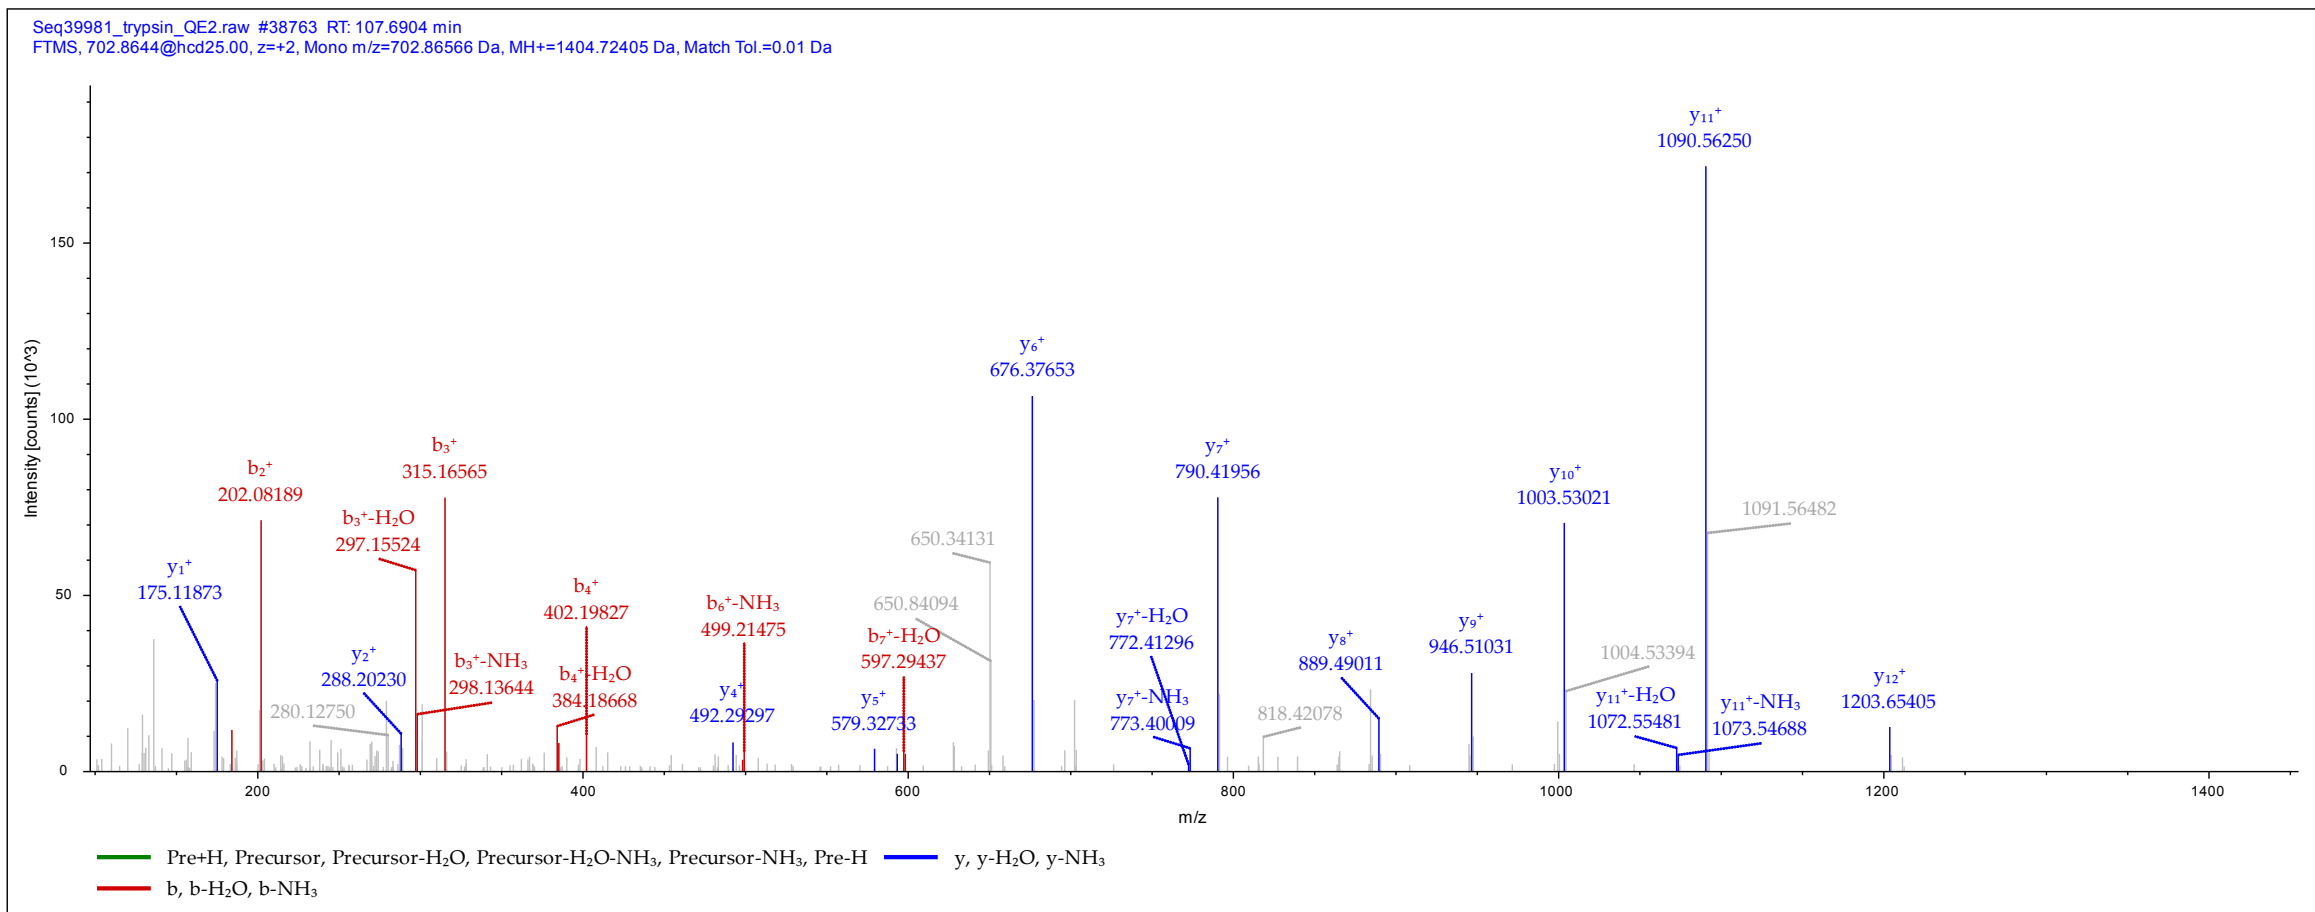



Sequence: VYPACGGPVCR, C5-Carbamidomethyl (57.02146 Da), C6-Carbamidomethyl (57.02146 Da), C11-Carbamidomethyl (57.02146 Da)

Charge: +3, Monoisotopic m/z: 465.87039 Da (0 mmu/0 ppm), MH+: 1395.59662 Da, RT: 66.5113 min,

Identified with: Sequest HT (v1.17); XCorr:3.51, Percolator q-Value:0, Percolator PEP:5.7e-05,

Ions matched by search engine: 0/0

Fragment match tolerance used for search: 0.02 Da

Accession:

cds.comp41326\_c0\_seq1\_m.795841

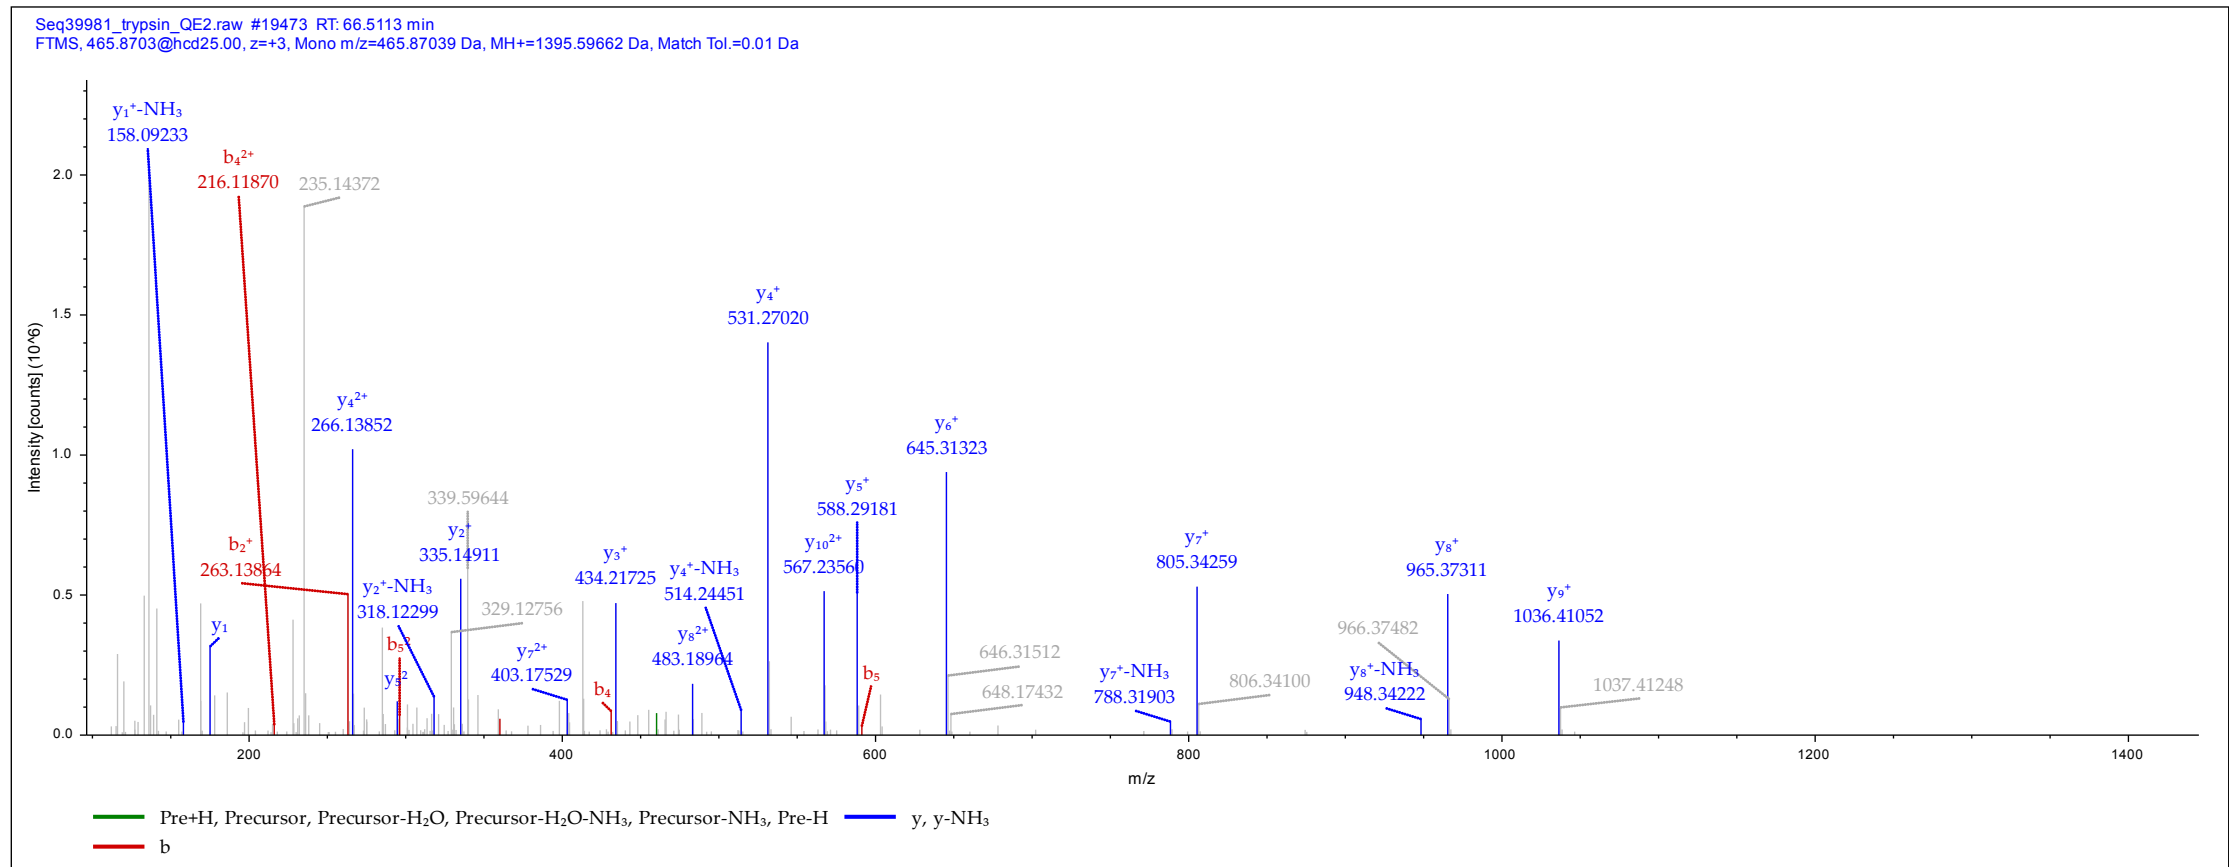

Sequence: IINEPTAAAIAYGLDKK, Charge: +3, Monoisotopic m/z: 596.66876 Da  
 (+0.52 mmu/+0.87 ppm), MH+: 1787.99173 Da, RT: 112.1093 min,  
 Identified with: Sequest HT (v1.17); XCorr:5.74, Percolator q-Value:0,  
 Percolator PEP:3.32e-06, Ions matched by search engine: 0/0  
 Fragment match tolerance used for search: 0.02 Da

Accession:  
 cds.comp22923\_c1\_seq1\_m.89577

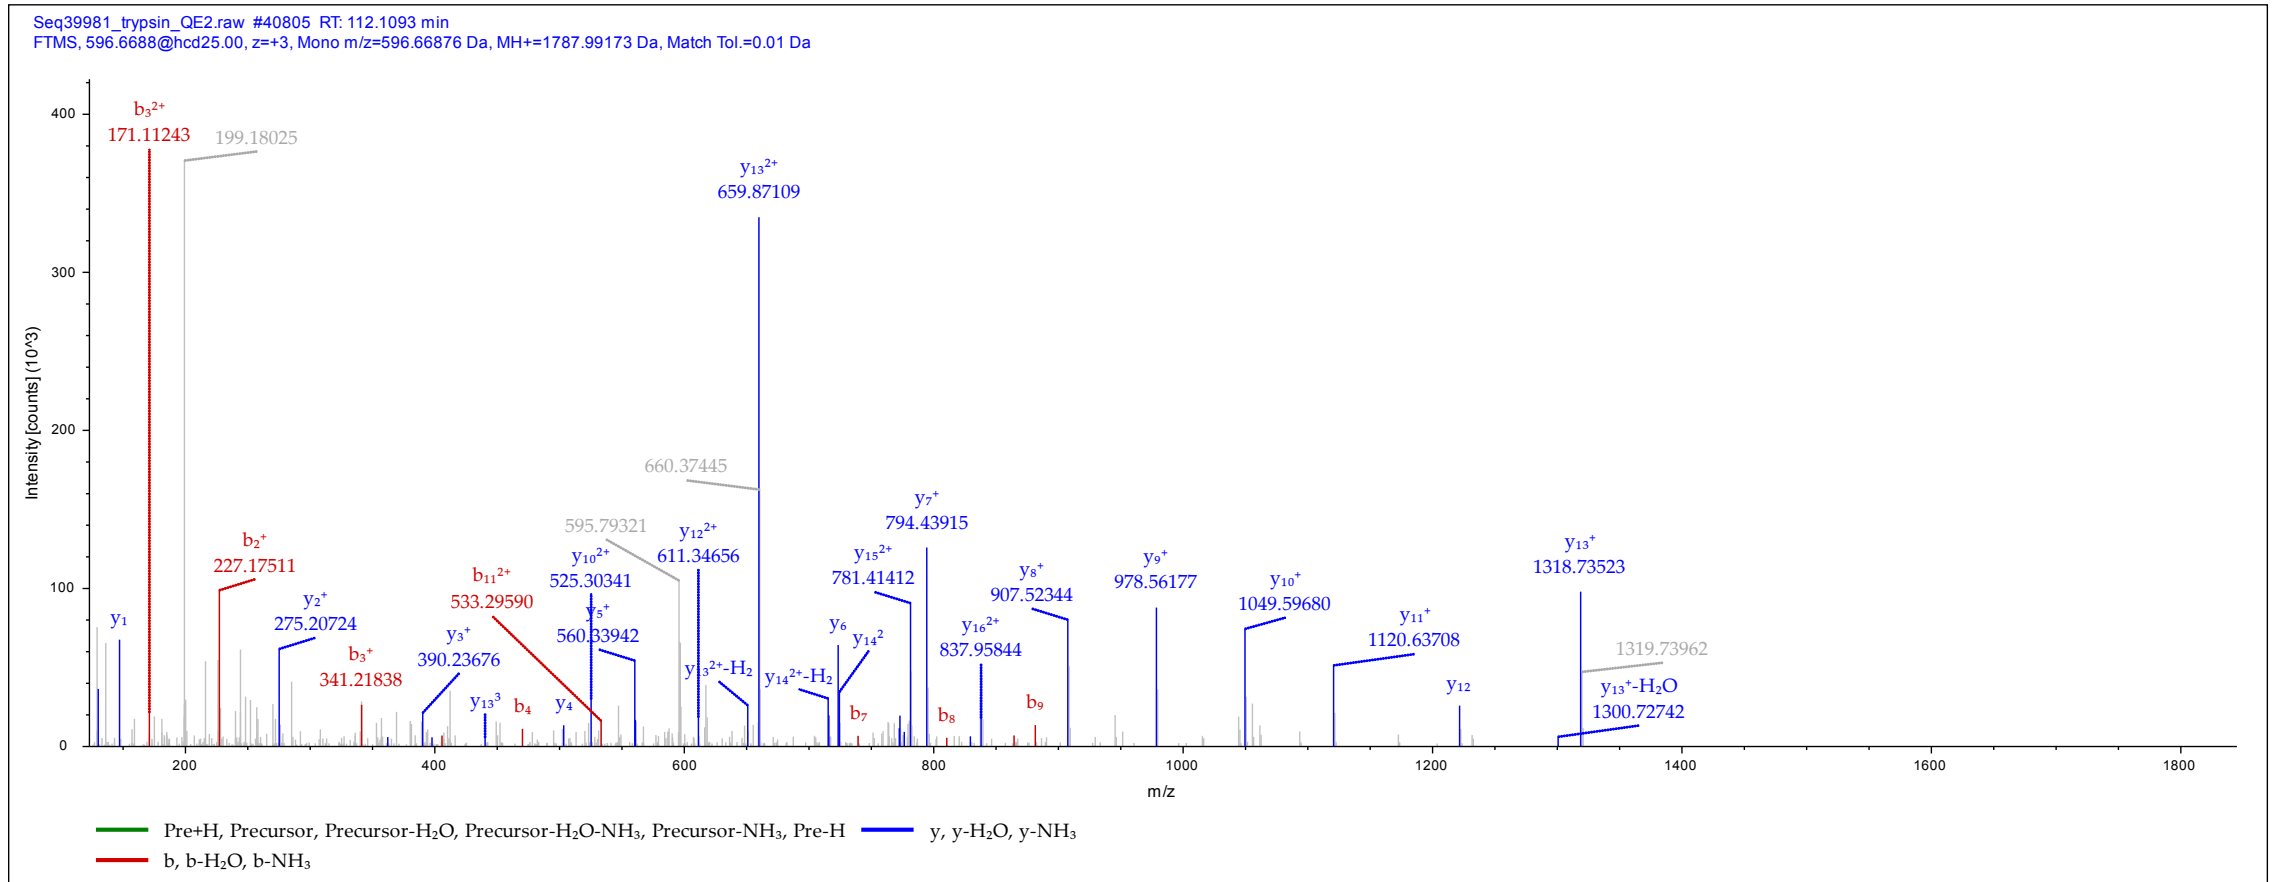

Sequence: MKNVEIETK, Charge: +3, Monoisotopic m/z: 364.53009 Da (-0.27 mmu/-0.74 ppm), MH+: 1091.57572 Da, RT: 51.5356 min, Identified with: Sequest HT (v1.17); XCorr:2.89, Percolator q-Value:0.00108, Percolator PEP:0.0134, Ions matched by search engine: 0/0 Fragment match tolerance used for search: 0.02 Da

Accession:  
 cds.comp40852\_c0\_seq11\_m.641087

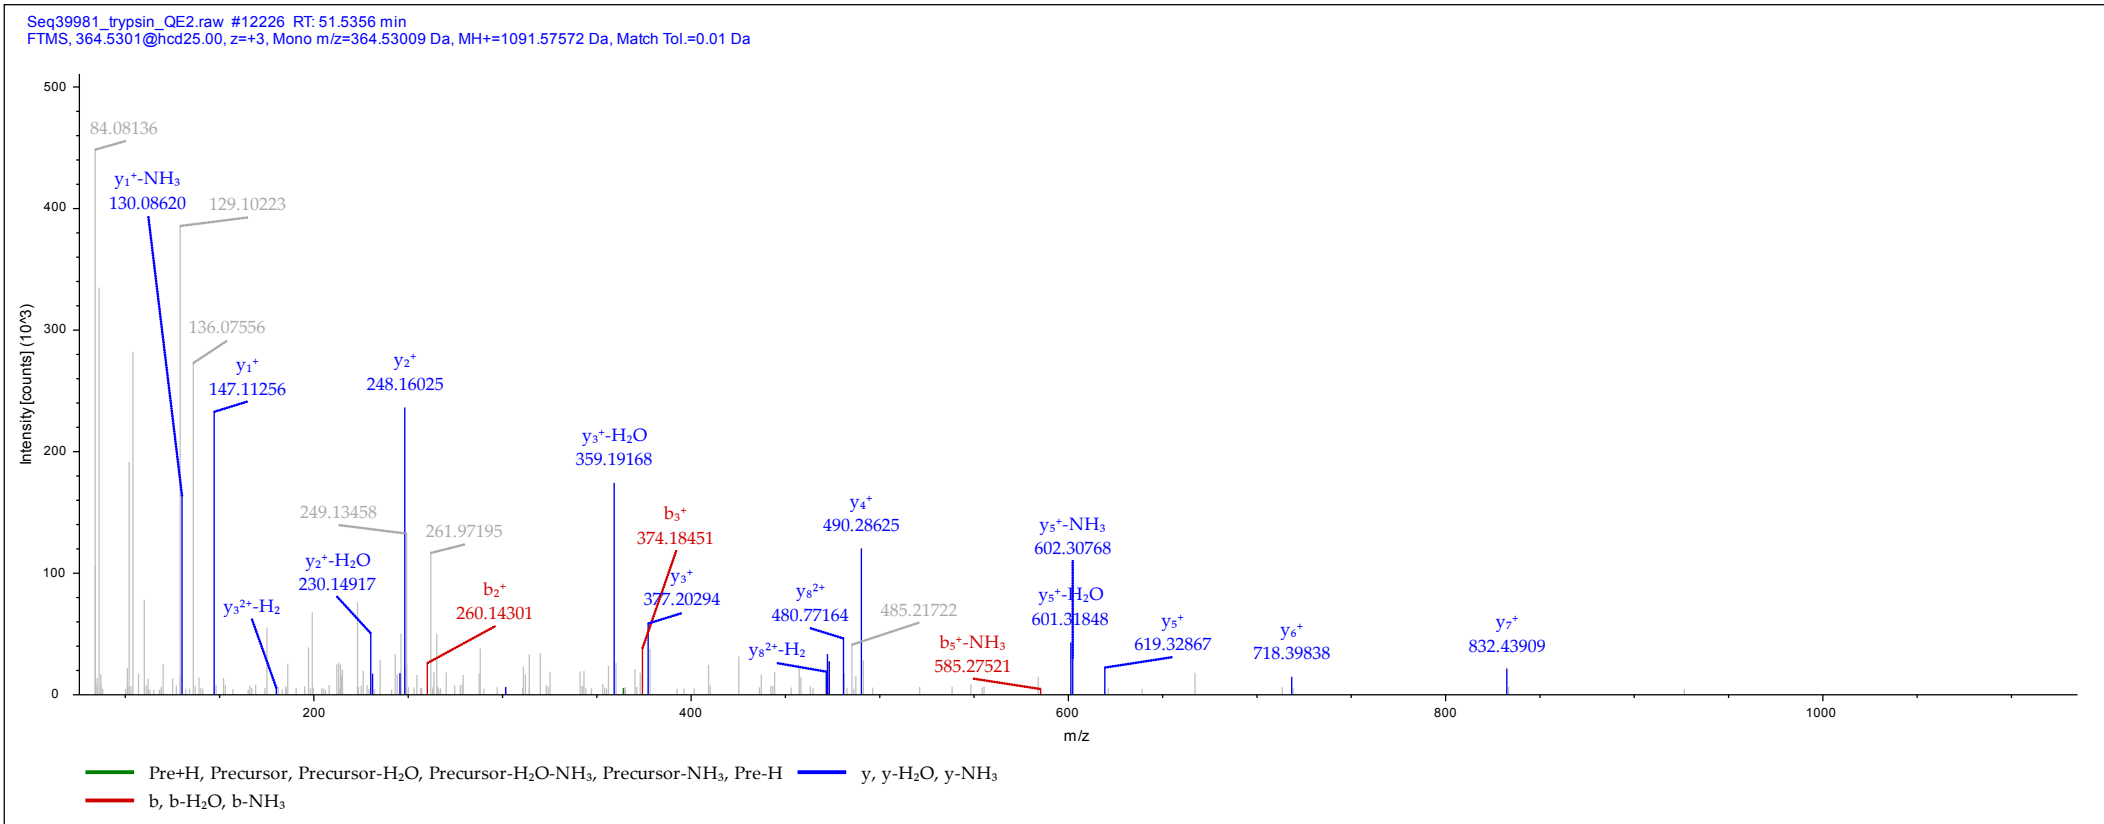

Sequence: ITEALMSVK, Charge: +2, Monoisotopic m/z: 496.27814 Da (-0.12 mmu/-0.25 ppm), MH+: 991.54900 Da, RT: 86.0348 min, Identified with: Sequest HT (v1.17); XCorr:2.70, Percolator q-Value:0.000616, Percolator PEP:0.00268, Ions matched by search engine: 0/0 Fragment match tolerance used for search: 0.02 Da

Accession:  
cds.comp39265\_c3\_seq4\_m.392968

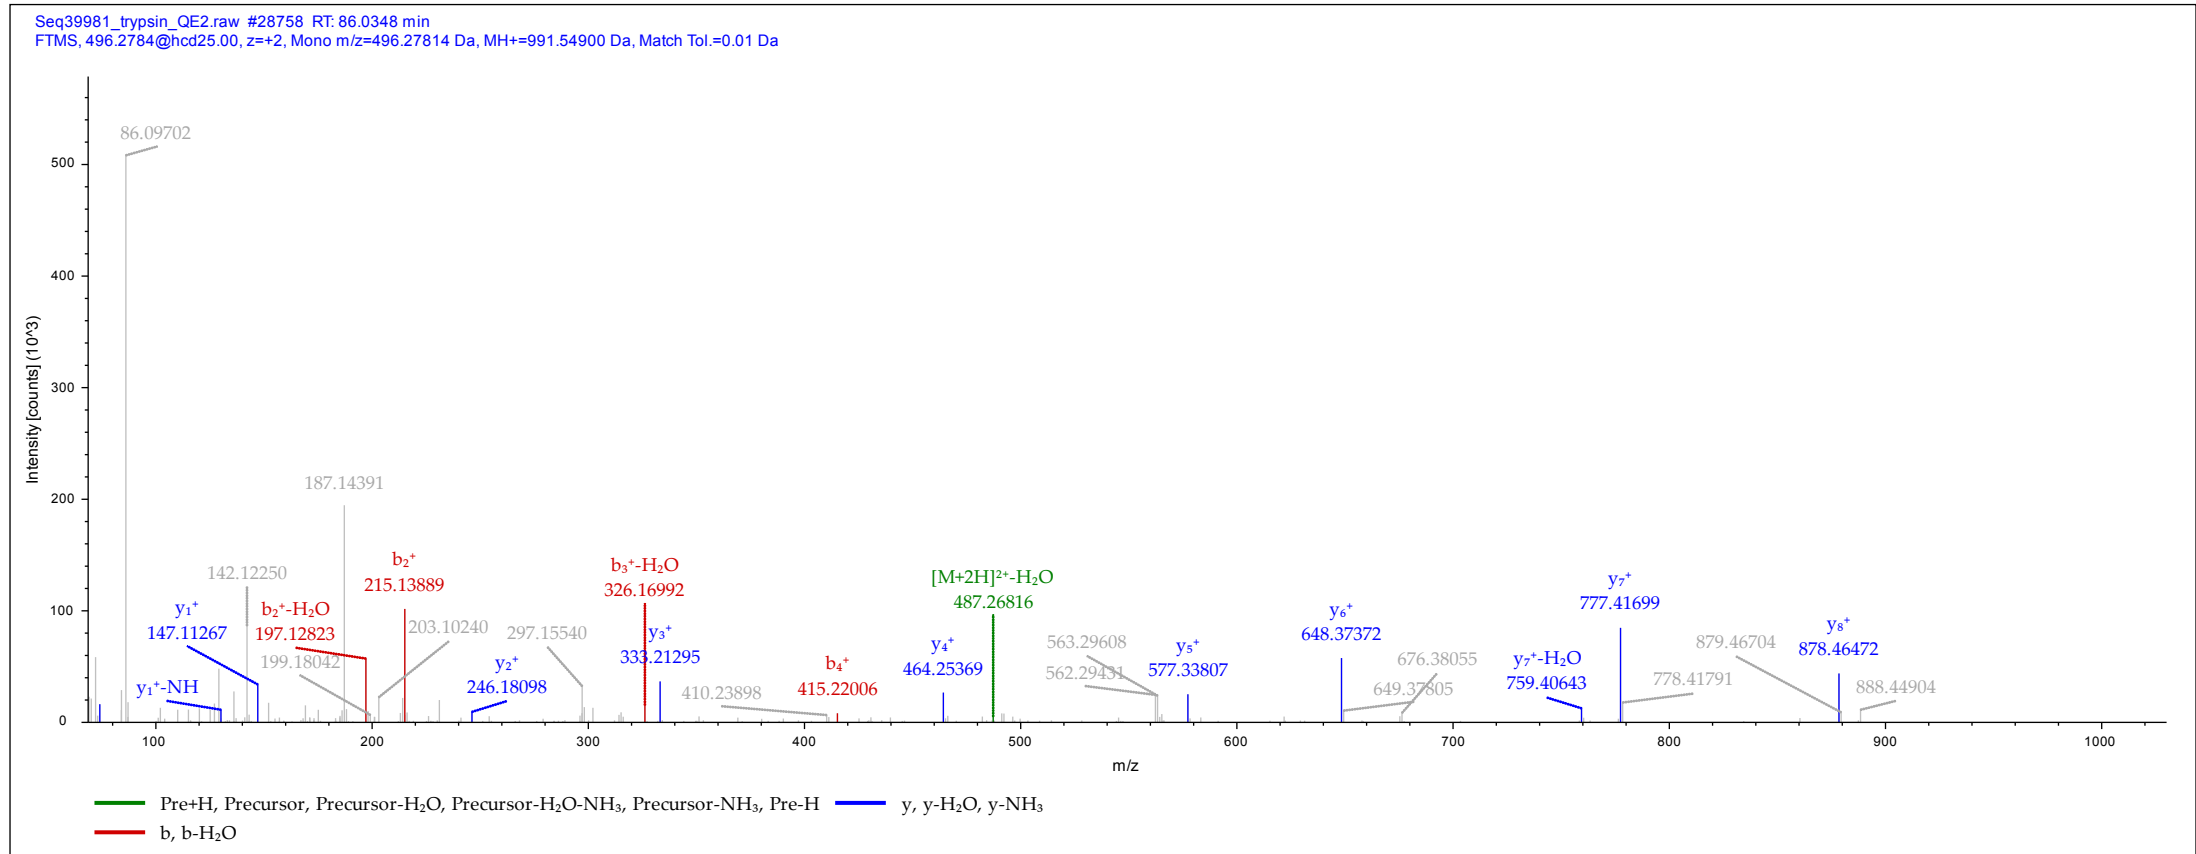

Sequence: ESEHAPLVLFSGQFLNPEQ, Charge: +2, Monoisotopic m/z: 1071.52832 Da (-0.42 mmu/-0.39 ppm), MH+: 2142.04936 Da, RT: 154.5200 min, Identified with: Sequest HT (v1.17); XCorr:5.28, Percolator q-Value:0, Percolator PEP: 2.49e-05, Ions matched by search engine: 0/0  
 Fragment match tolerance used for search: 0.02 Da

Accession:  
 cds.comp40289\_c4\_seq11\_m.508802

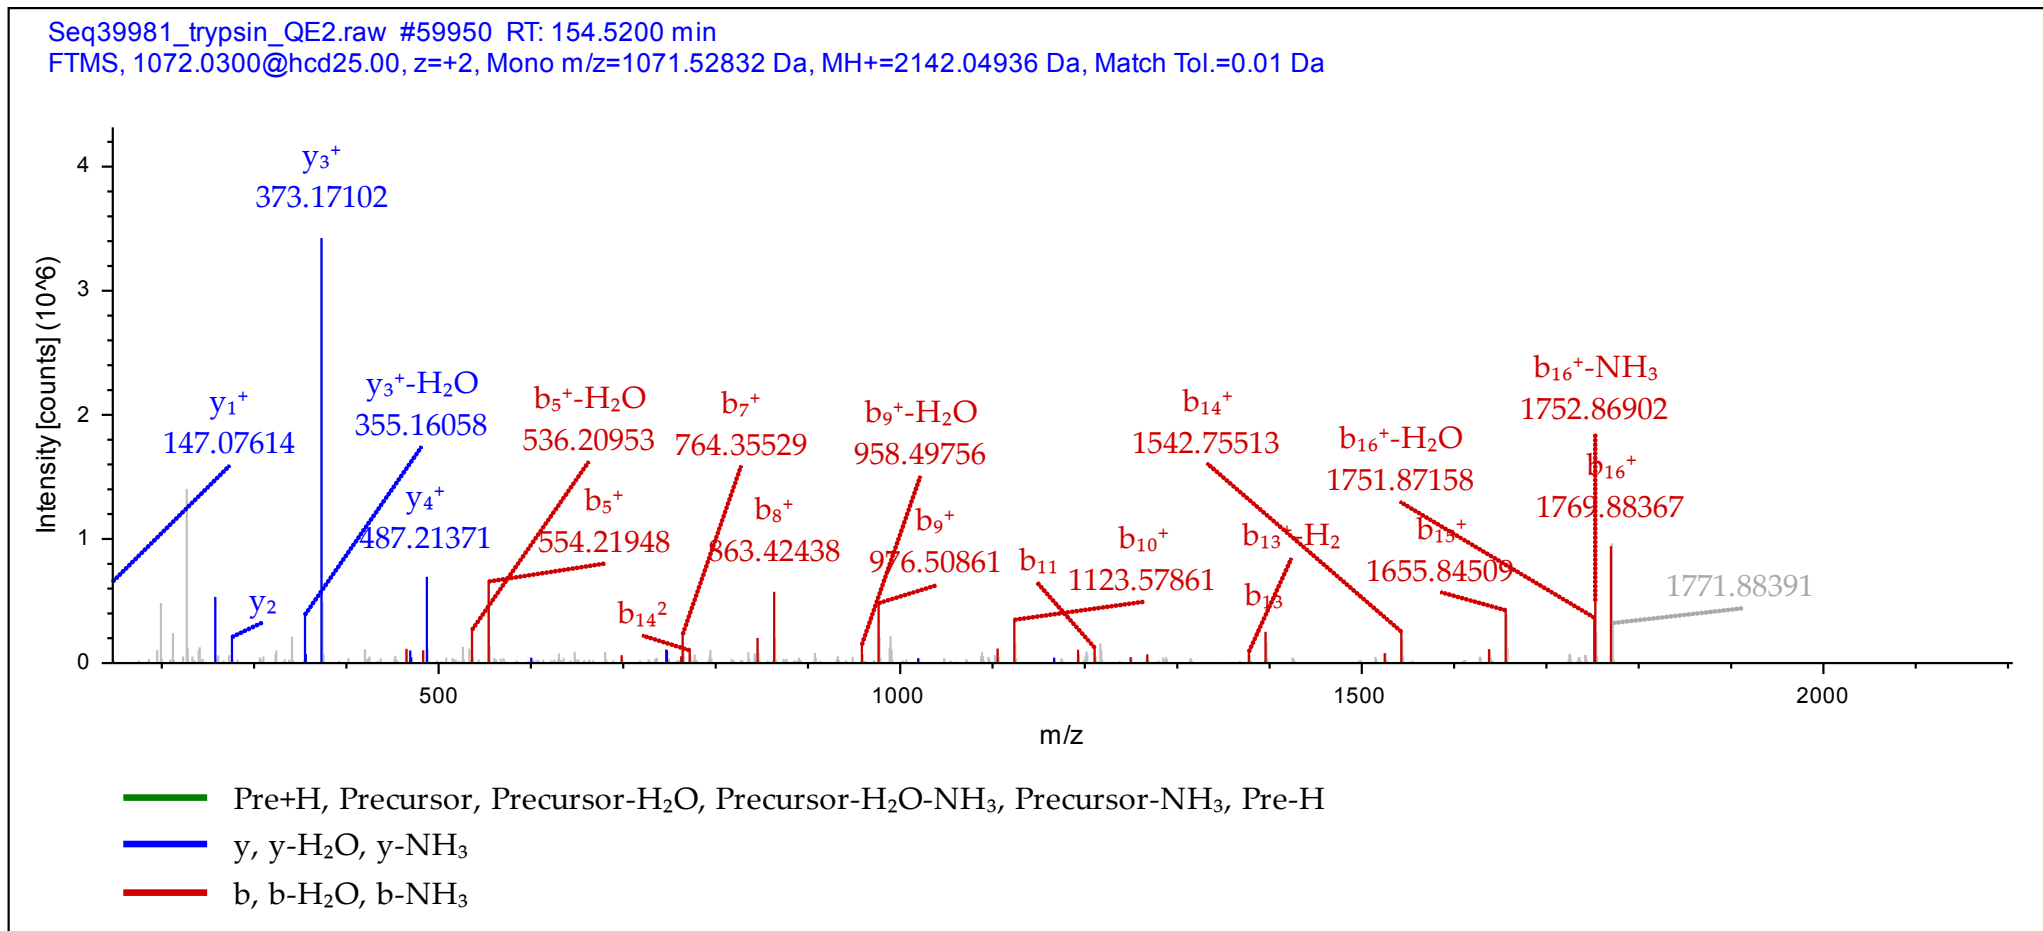

Sequence: SMFHQFPSMAF, M2-Oxidation (15.99492 Da), M9-Oxidation (15.99492 Da)  
 Charge: +2, Monoisotopic m/z: 681.28577 Da (-0.52 mmu/-0.77 ppm), MH+: 1361.56426 Da, RT: 100.8341 min,  
 Identified with: Sequest HT (v1.17); XCorr:3.06, Percolator q-Value:0.000195, Percolator PEP: 0.00051, Ions matched by search engine: 0/0  
 Fragment match tolerance used for search: 0.02 Da

Accession:  
 cds.comp39451\_c0\_seq2\_m.410525

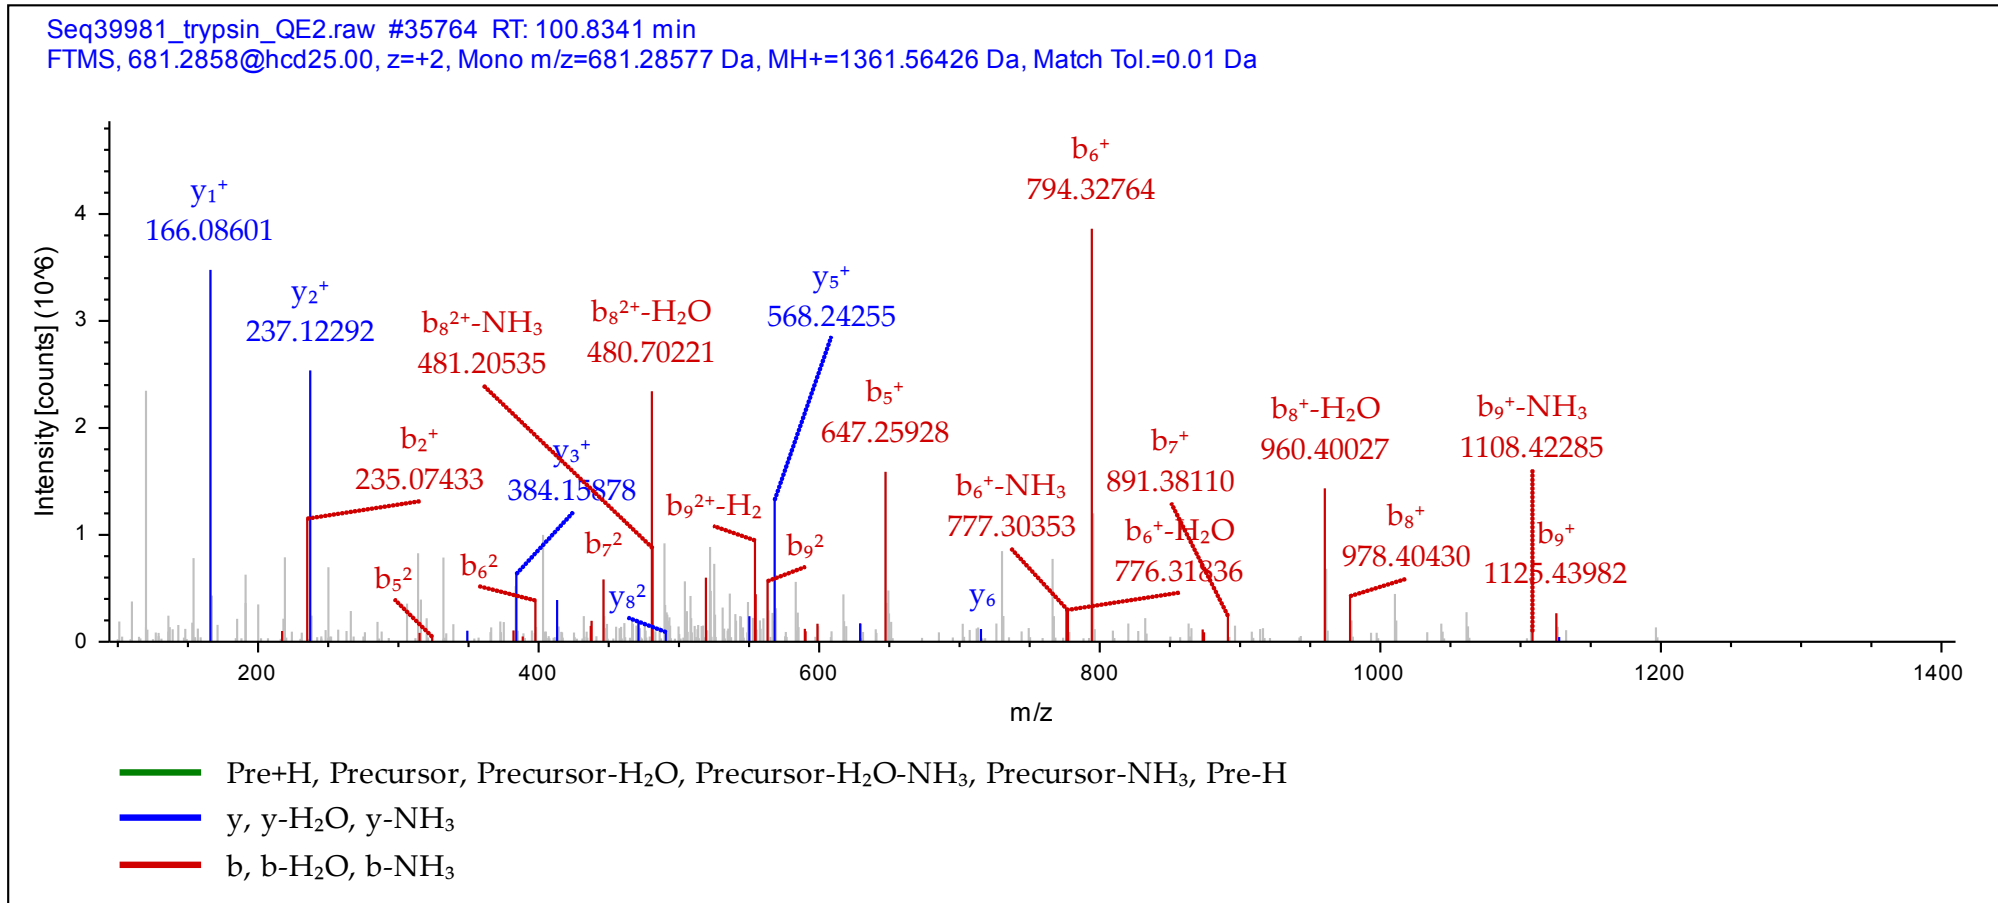

**Sequence: RTLDSVHLR, R1-Formyl (27.99492 Da)**  
**Charge: +3, Monoisotopic m/z: 375.54065 Da (-3.23 mmu/-8.61 ppm),**  
**MH+: 1124.60739 Da, RT: 85.7404 min,**  
**Identified with: Sequest HT (v1.17); XCorr:2.38, Percolator q-Value:0.00126,**  
**Percolator PEP:0.0199, Ions matched by search engine: 0/0**  
**Fragment match tolerance used for search: 0.02 Da**

**Accession:**  
**cds.comp6644\_c0\_seq1\_m.19135**

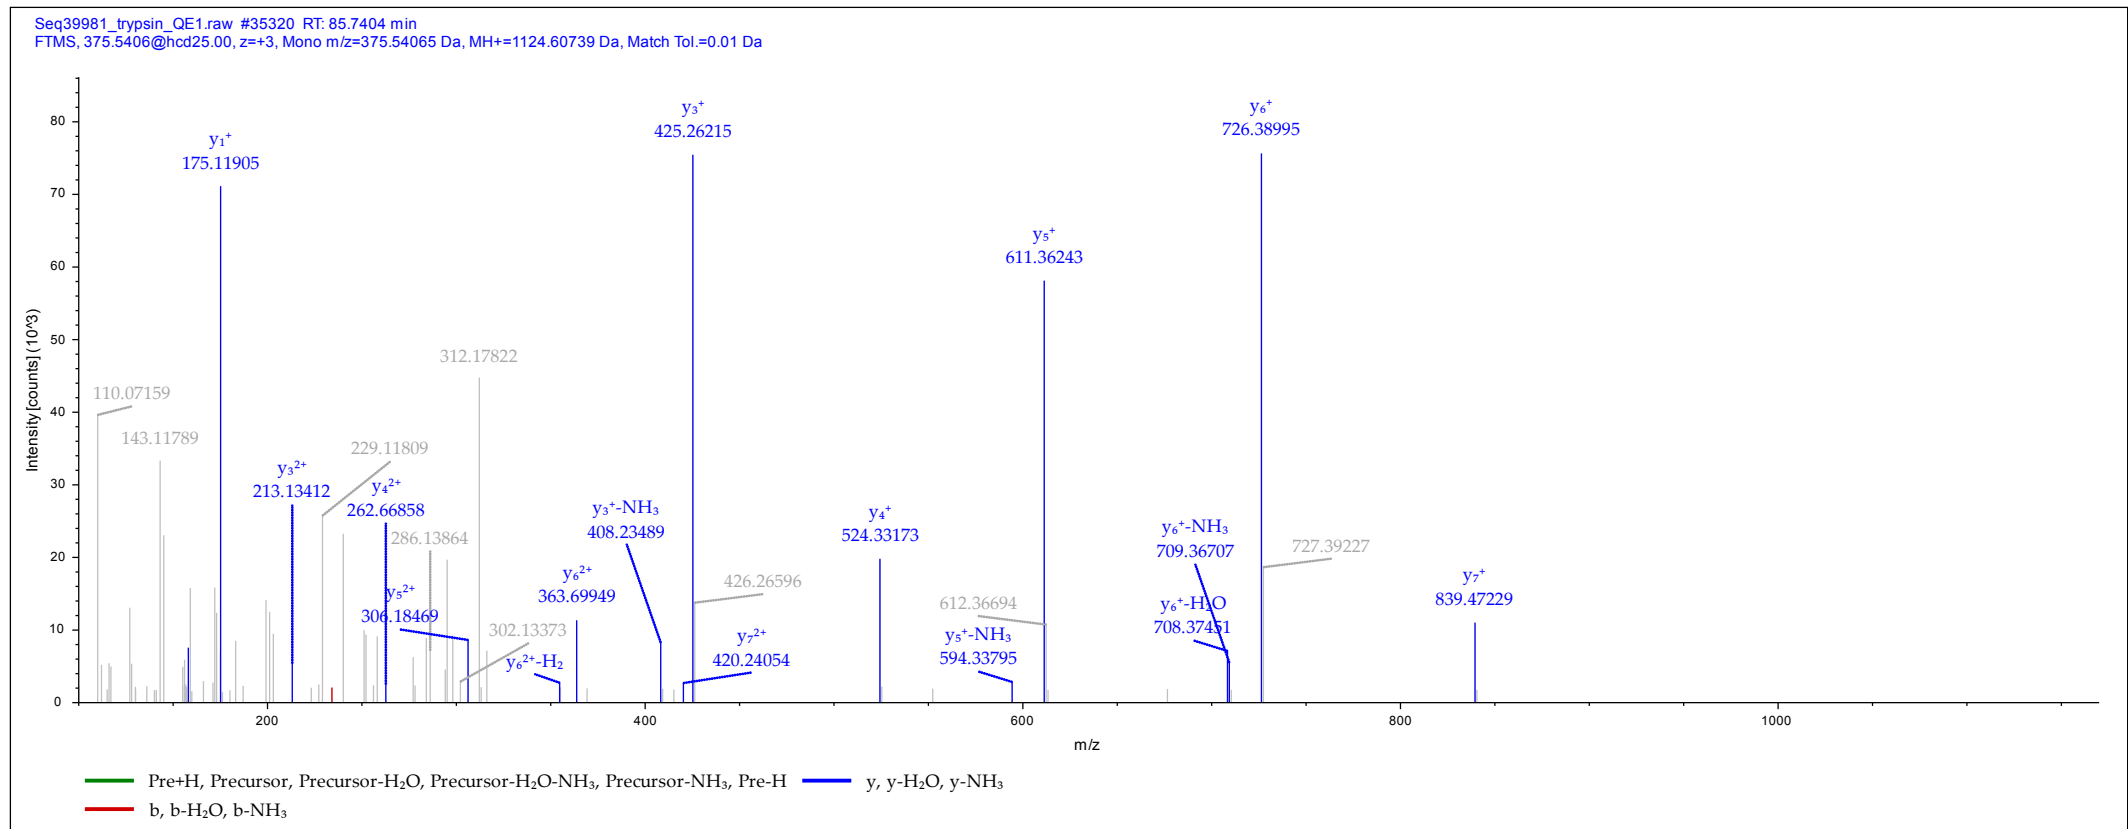

Sequence: NSNKECVKPEDC, C6-Carbamidomethyl (57.02146 Da), C12-Carbamidomethyl (57.02146 Da)  
 Charge: +3, Monoisotopic m/z: 493.87909 Da (+0.82 mmu/+1.66 ppm), MH+: 1479.62271 Da, RT: 42.2865 min,  
 Identified with: Sequest HT (v1.17); XCorr:4.37, Percolator q-Value:0.000616, Percolator PEP:0.00302, Ions matched by search engine: 0/0  
 Fragment match tolerance used for search: 0.02 Da

Accession:  
 cds.comp40590\_c4\_seq11\_m.572803

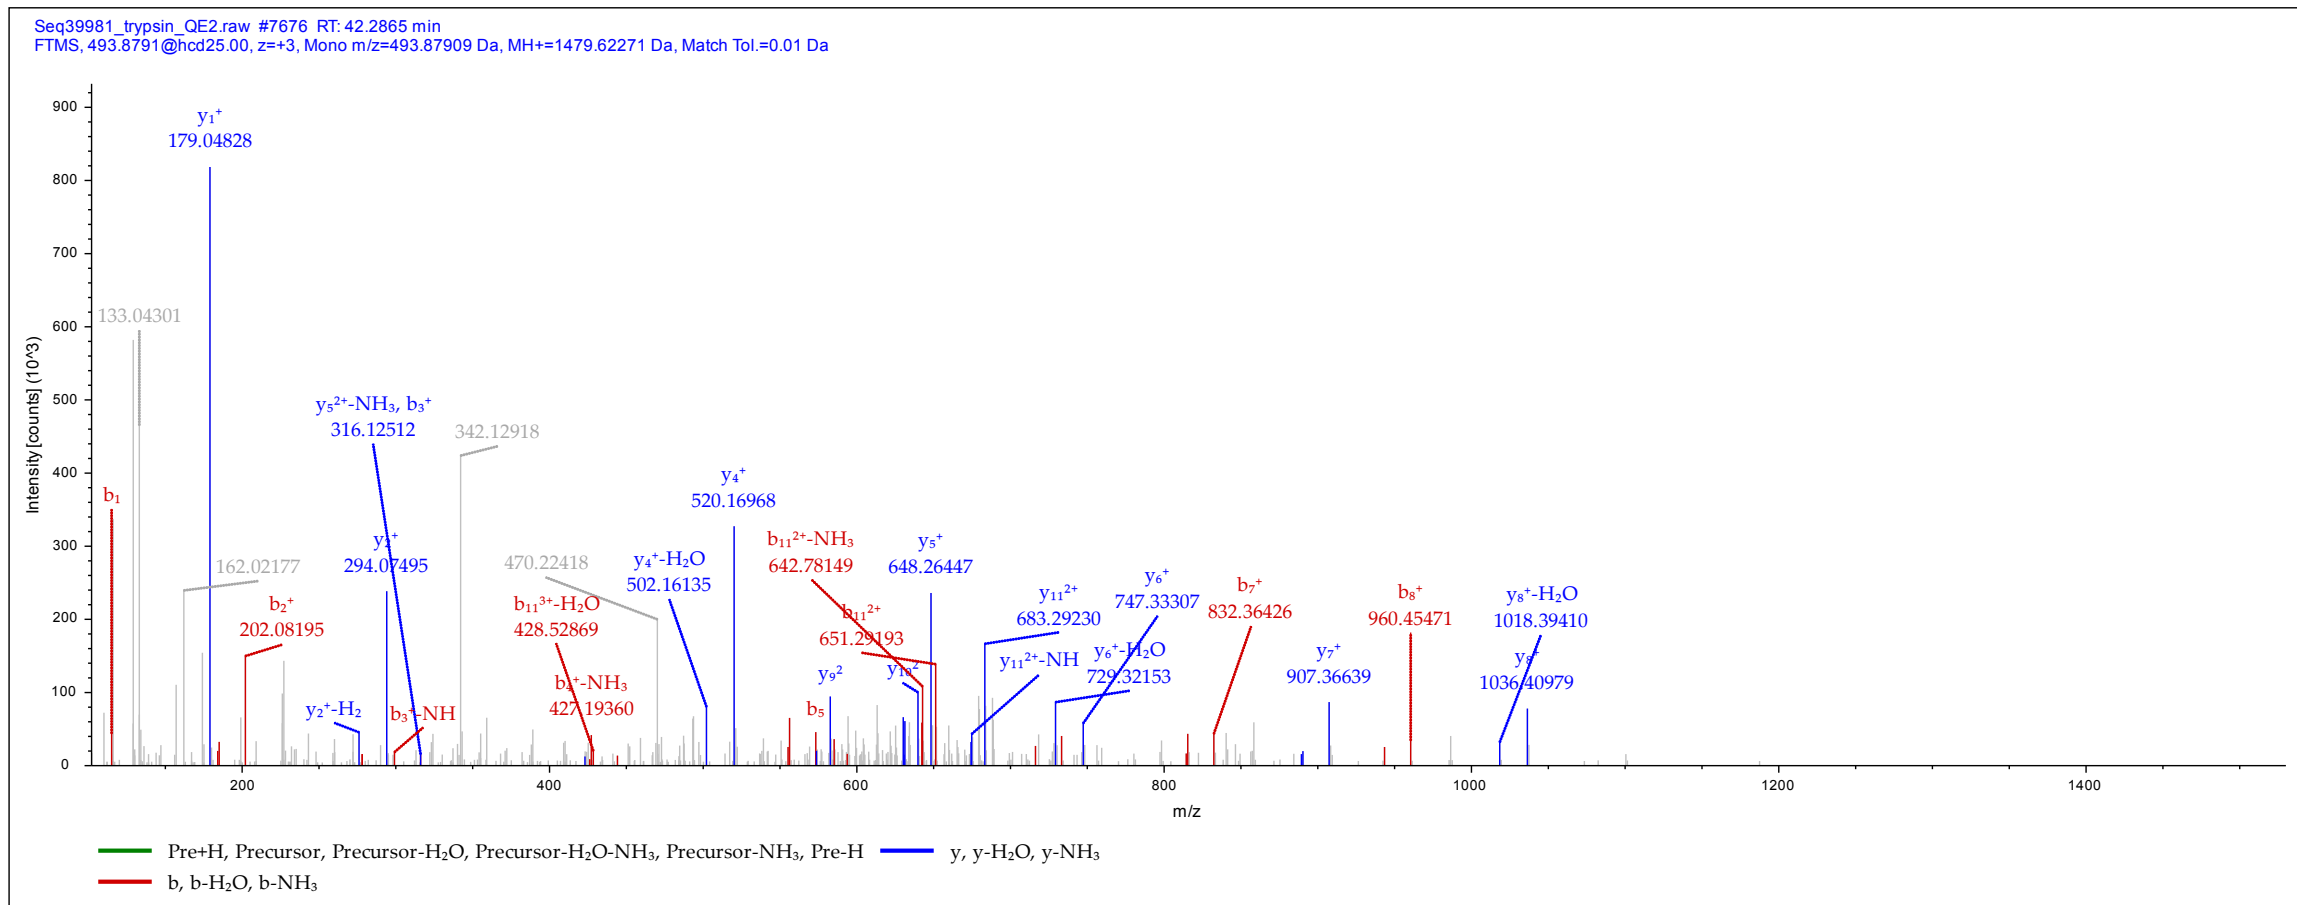



Sequence: NNPIPSTVGEWSVHSVIK, Charge: +3, Monoisotopic m/z: 655.34503 Da (-1.02 mmu/-1.56 ppm), MH+: 1964.02054 Da, RT: 119.9207 min, Identified with: Sequest HT (v1.17); XCorr:4.64, Percolator q-Value:0, Percolator PEP:5.28e-06, Ions matched by search engine: 0/0  
 Fragment match tolerance used for search: 0.02 Da

Accession:  
 cds.comp41312\_c0\_seq2\_m.793188

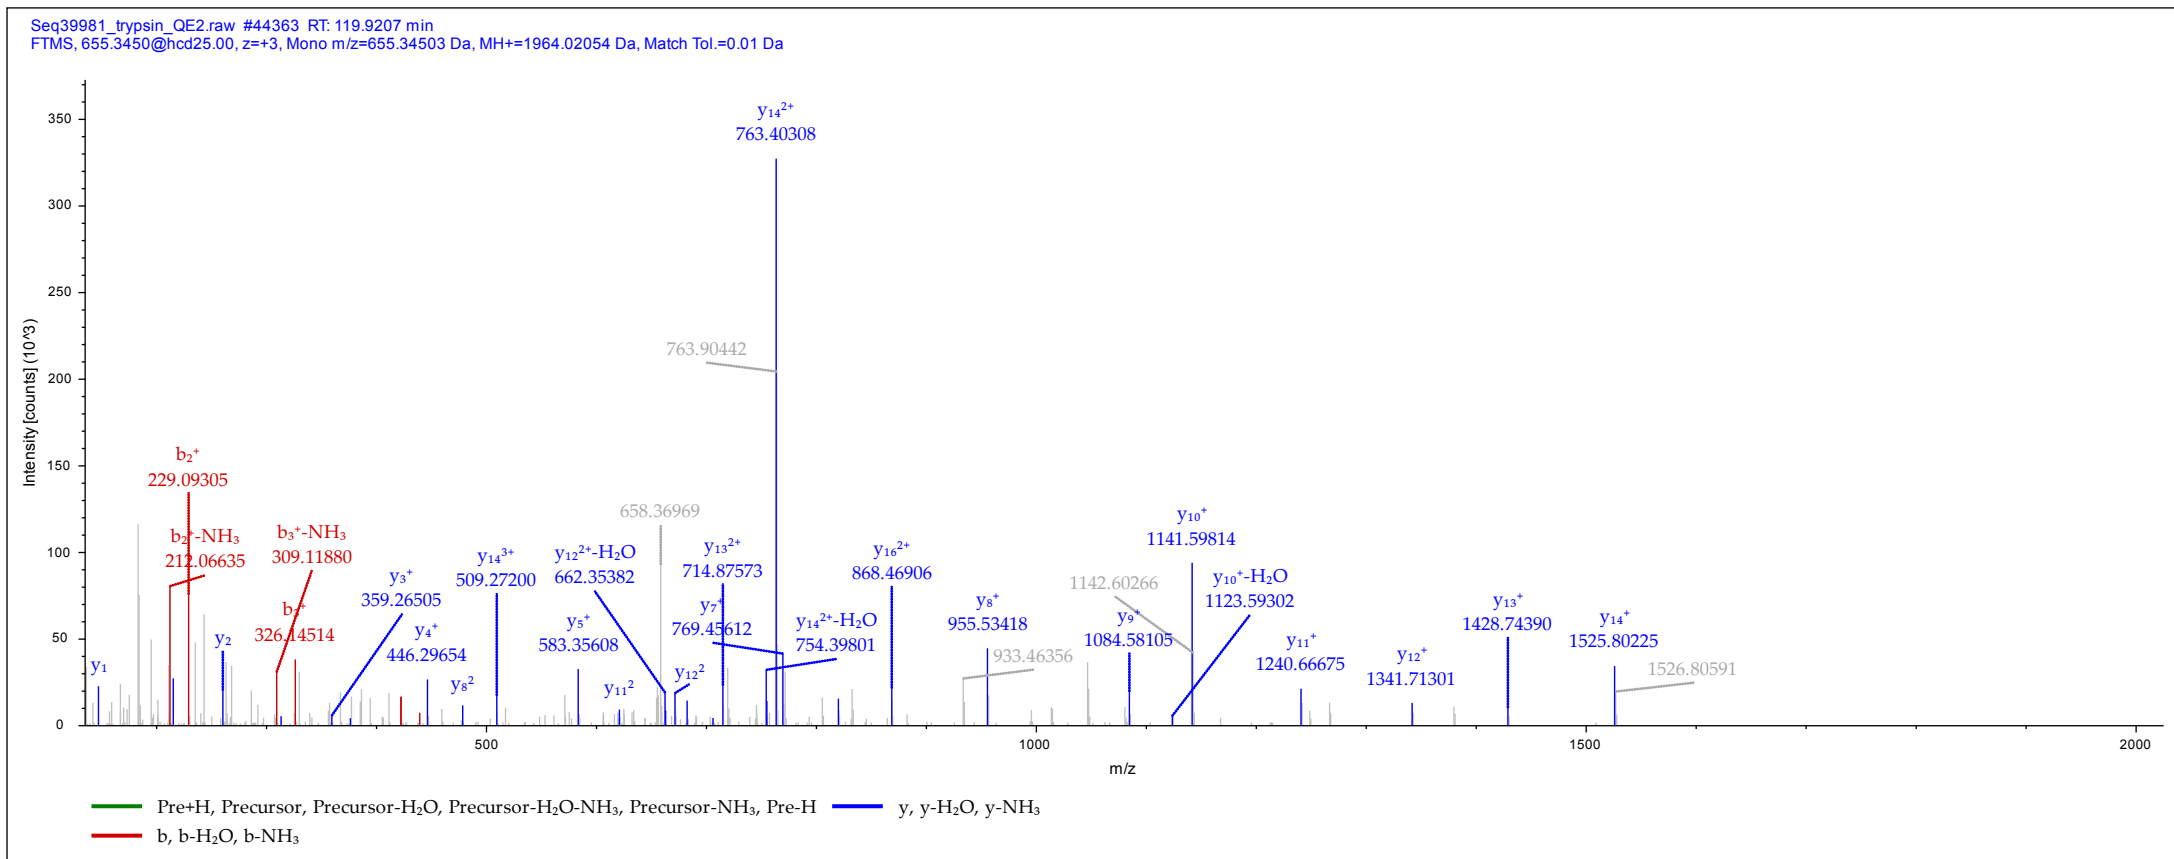



**Sequence: ATALLVHR, A1-Formyl (27.99492 Da)**  
**Charge: +3, Monoisotopic m/z: 303.51489 Da (-0.37 mmu/-1.21 ppm), MH+: 908.53012 Da, RT: 54.7395 min,**  
**Identified with: Sequest HT (v1.17); XCorr:2.49, Percolator q-Value:0.00108, Percolator PEP:0.0143, Ions matched by search engine: 0/0**  
**Fragment match tolerance used for search: 0.02 Da**

Accession:  
 cds.comp40336\_c0\_seq3\_m.520364

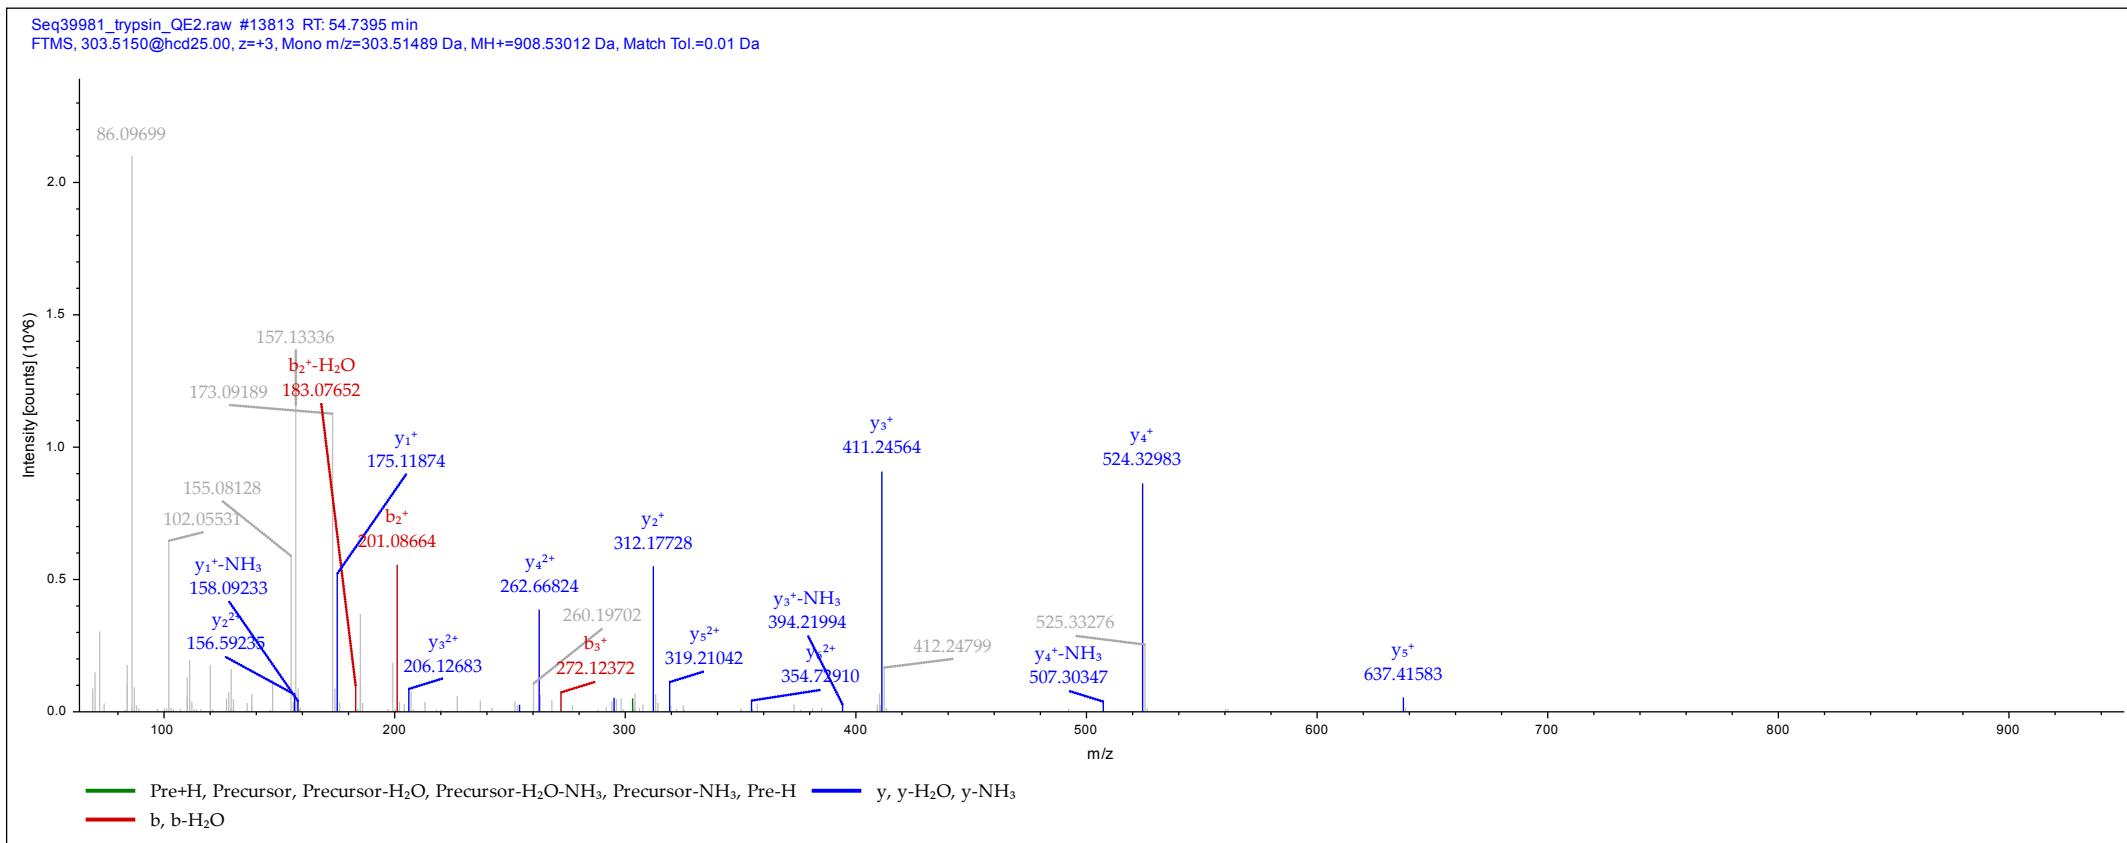

Sequence: NNPIPSTVGEWSVHSHVIK, Charge: +3, Monoisotopic m/z: 655.34503 Da (-1.02 mmu/-1.56 ppm), MH+: 1964.02054 Da, RT: 119.9207 min, Identified with: Sequest HT (v1.17); XCorr:4.64, Percolator q-Value:0, Percolator PEP:5.28e-06, Ions matched by search engine: 0/0 Fragment match tolerance used for search: 0.02 Da

Accession: cds.comp41312\_c0\_seq6\_m.793343

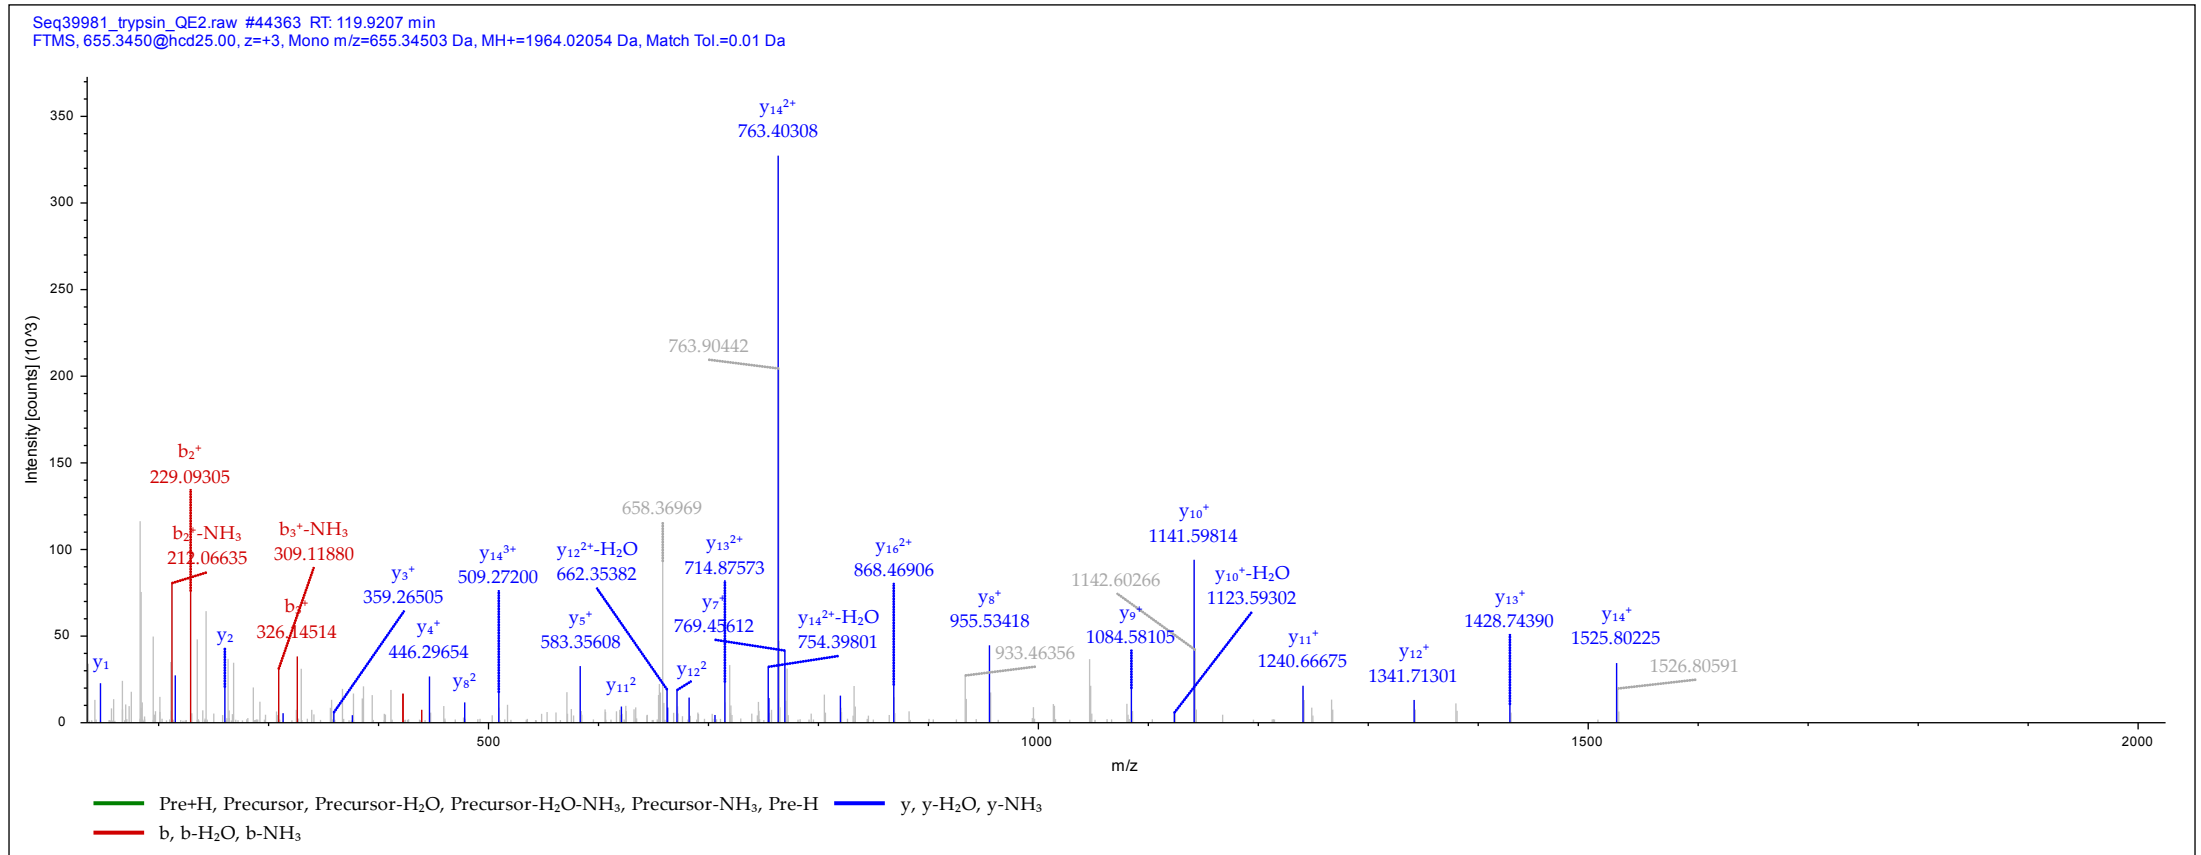

Sequence: YNTVVADAMIK, Charge: +2, Monoisotopic m/z: 612.81836 Da (+0.08 mmu/+0.13 ppm), MH+: 1224.62944 Da, RT: 95.2762 min, Identified with: Sequest HT (v1.17); XCorr:2.84, Percolator q-Value:0.000122, Percolator PEP:0.000168, Ions matched by search engine: 0/0 Fragment match tolerance used for search: 0.02 Da

Accession:  
cvs.comp39577\_c0\_seq3\_m.422174

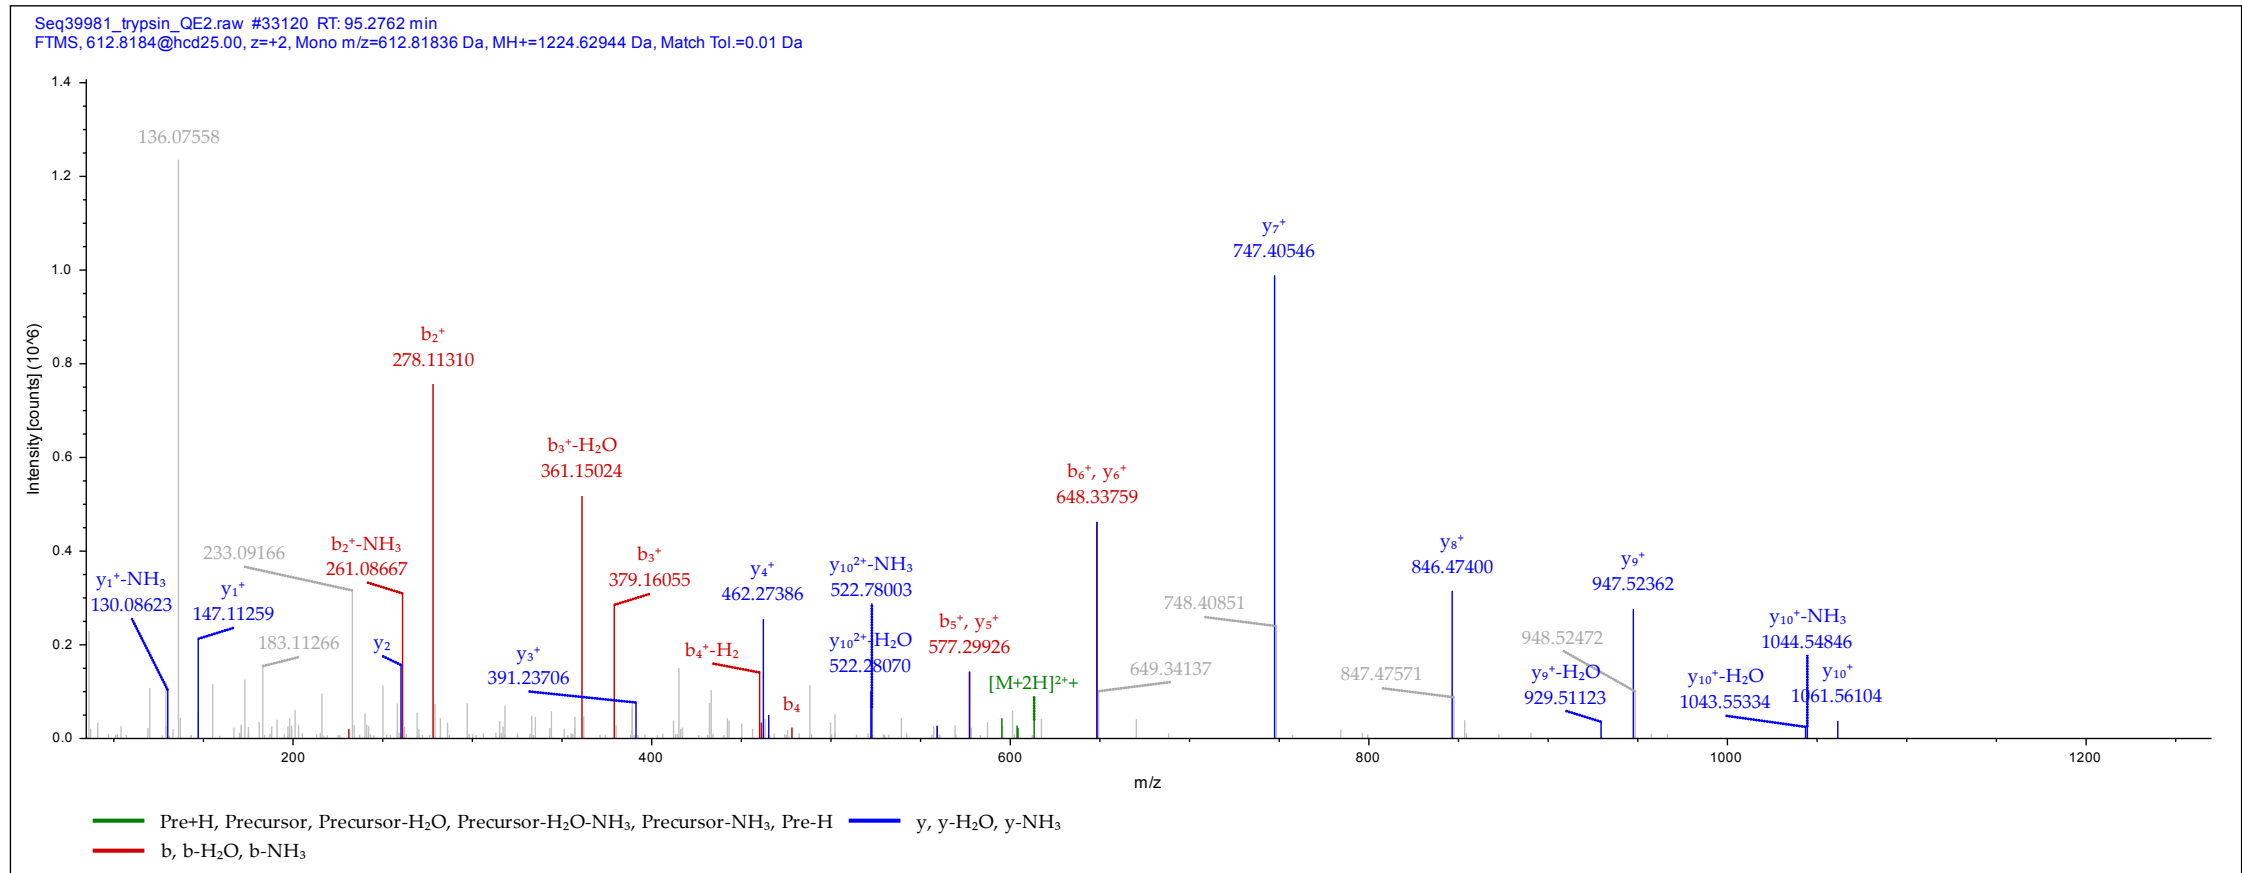

Sequence: MQSGICSTVK, C6-Carbamidomethyl (57.02146 Da)  
 Charge: +2, Monoisotopic m/z: 555.76746 Da (-0.28 mmu/-0.5 ppm), MH+:  
 1110.52764 Da, RT: 59.1203 min,  
 Identified with: Sequest HT (v1.17); XCorr:2.37, Percolator q-Value:0.000195,  
 Percolator PEP:0.000642, Ions matched by search engine: 0/0  
 Fragment match tolerance used for search: 0.02 Da

Accession:  
 cds.comp36801\_c3\_seq1\_m.263582

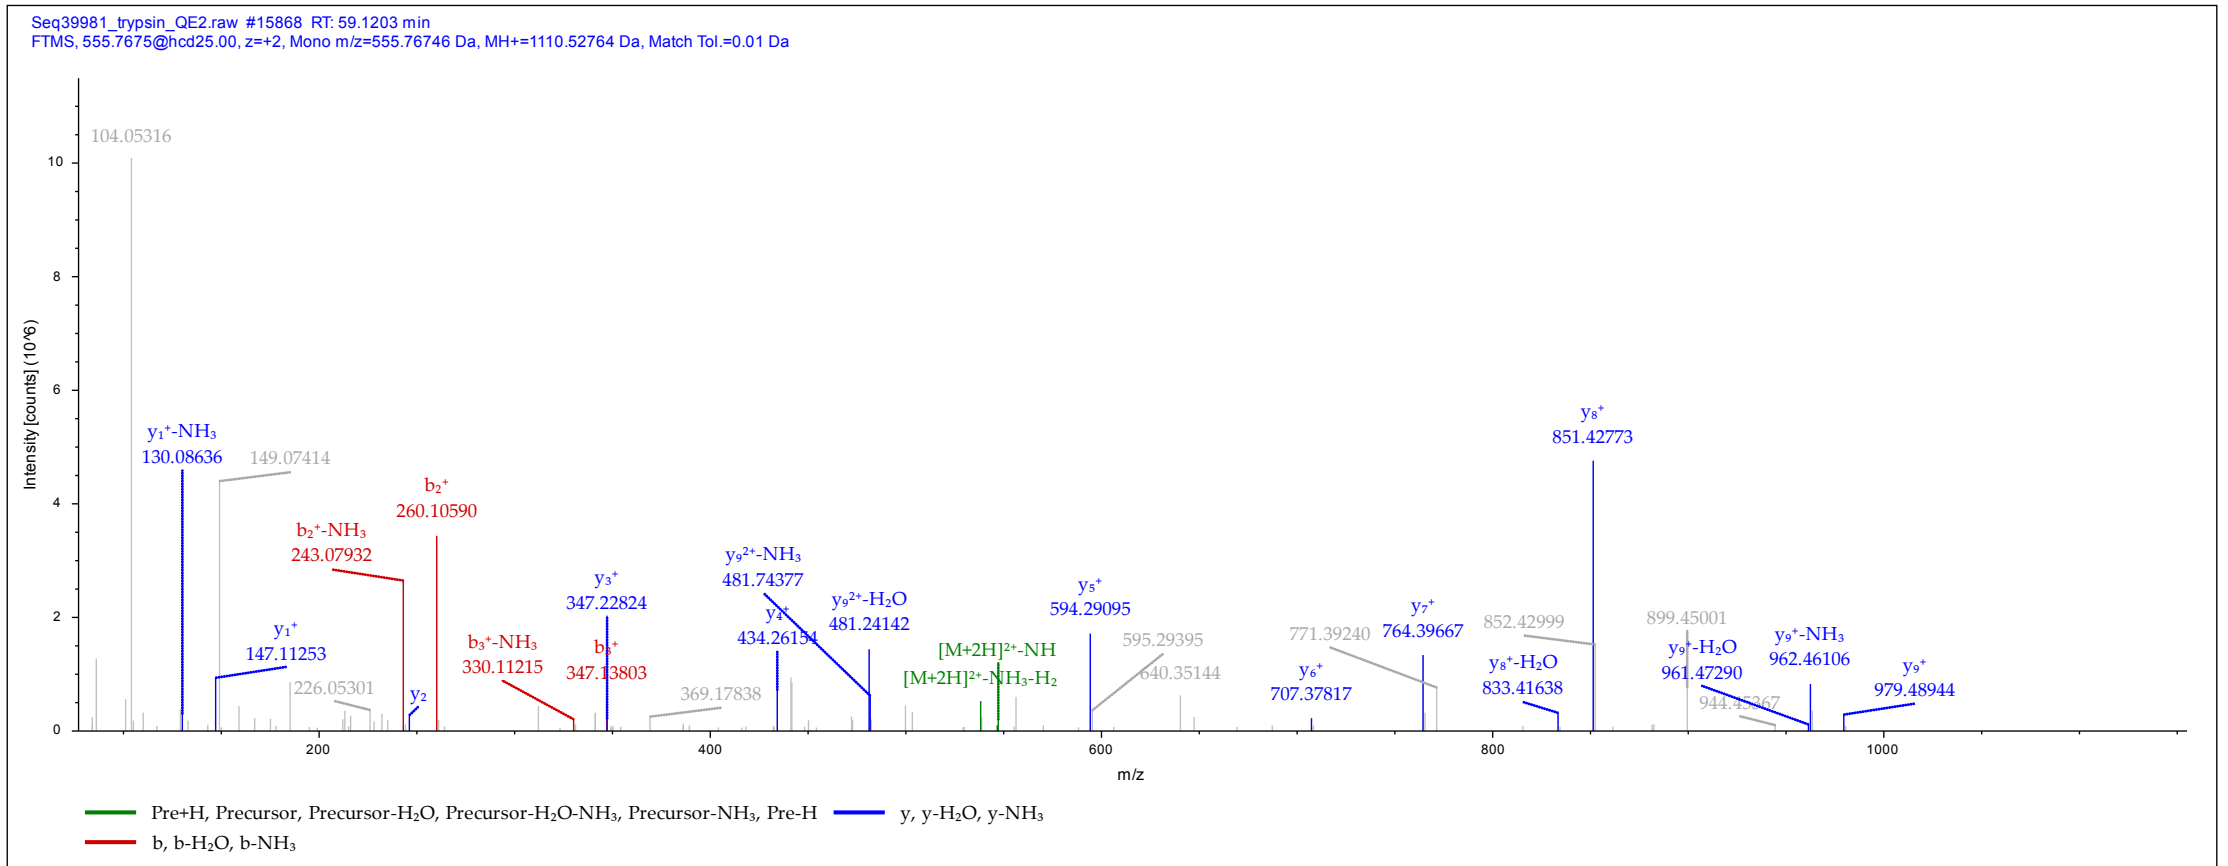

Sequence: NLDTAMNR, Charge: +2, Monoisotopic m/z: 467.72406 Da  
 (-0.12 mmu/-0.26 ppm), MH+: 934.44084 Da, RT: 56.5103 min,  
 Identified with: Sequest HT (v1.17); XCorr:2.07, Percolator q-Value:  
 0.00599, Percolator PEP:0.108, Ions matched by search engine: 0/0  
 Fragment match tolerance used for search: 0.02 Da

Accession:  
 cds.comp39265\_c3\_seq2\_m.392916

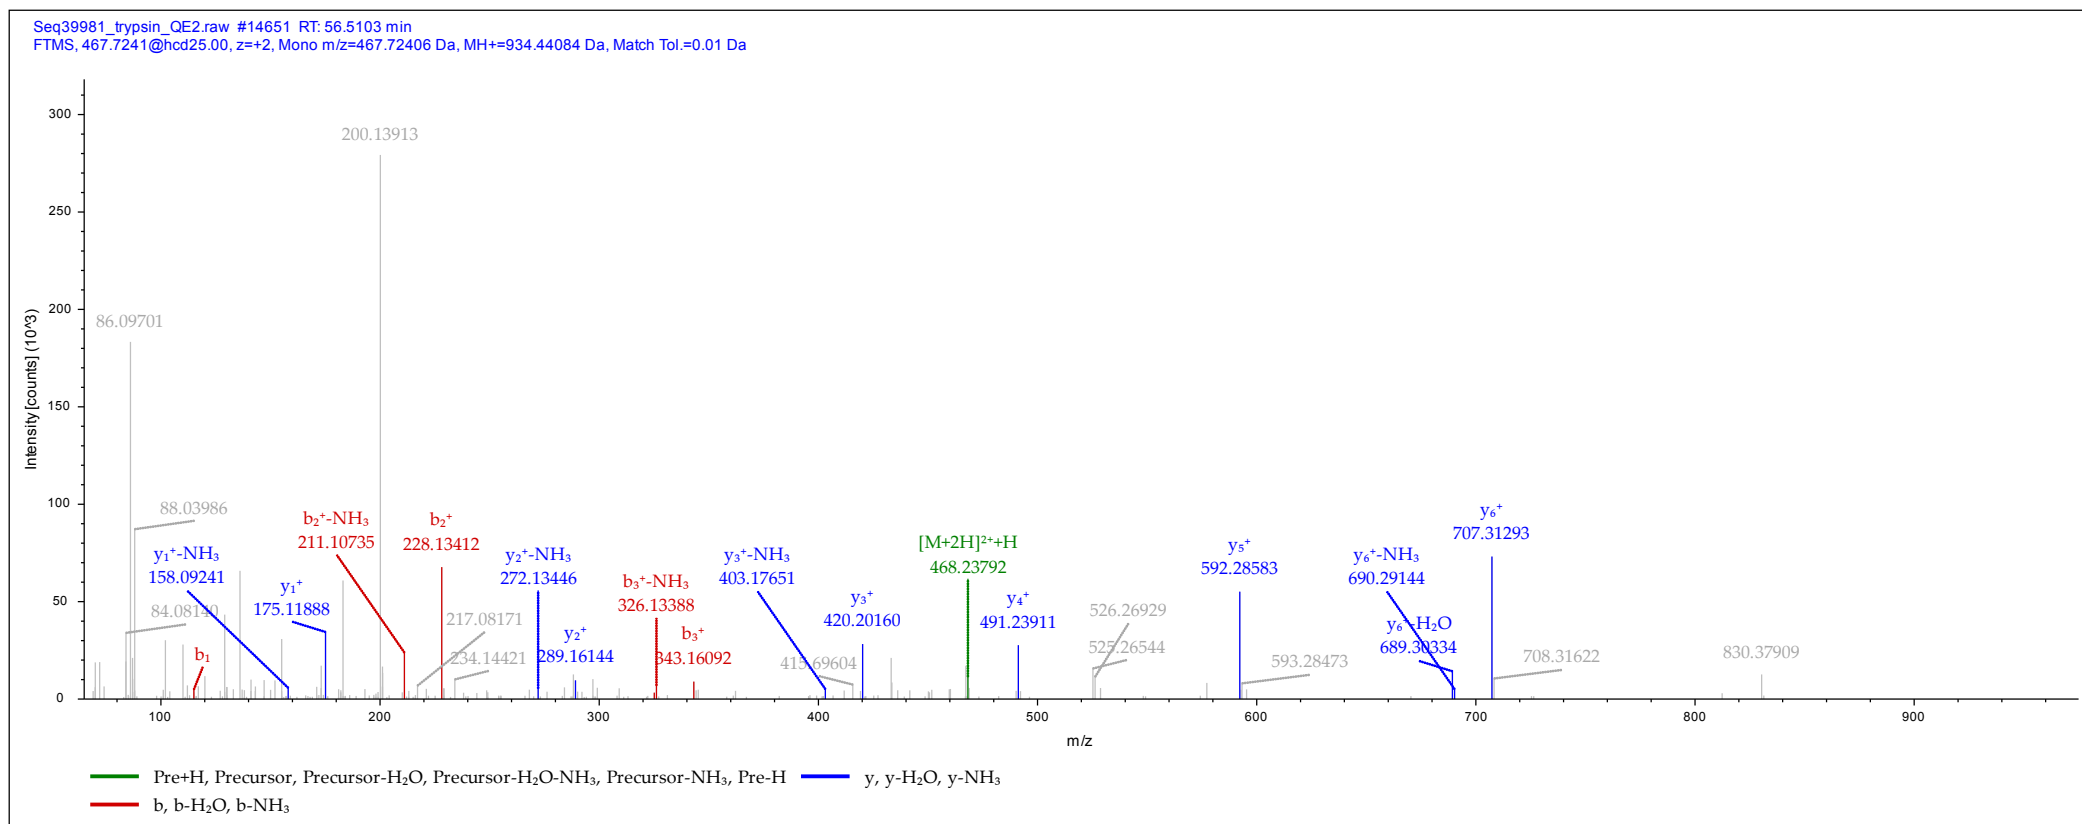

**Sequence: FLYFPLSNTCHEAYR, C10-Carbamidomethyl (57.02146 Da)**  
**Charge: +3, Monoisotopic m/z: 639.96820 Da (-1.73 mmu/-2.7 ppm),**  
**MH+: 1917.89005 Da, RT: 123.0561 min,**  
**Identified with: Sequest HT (v1.17); XCorr:3.68, Percolator q-Value:0,**  
**Percolator PEP:4.23e-05, Ions matched by search engine: 0/0**  
**Fragment match tolerance used for search: 0.02 Da**

**Accession:**  
**cds.comp41976\_c0\_seq1\_m.808306**

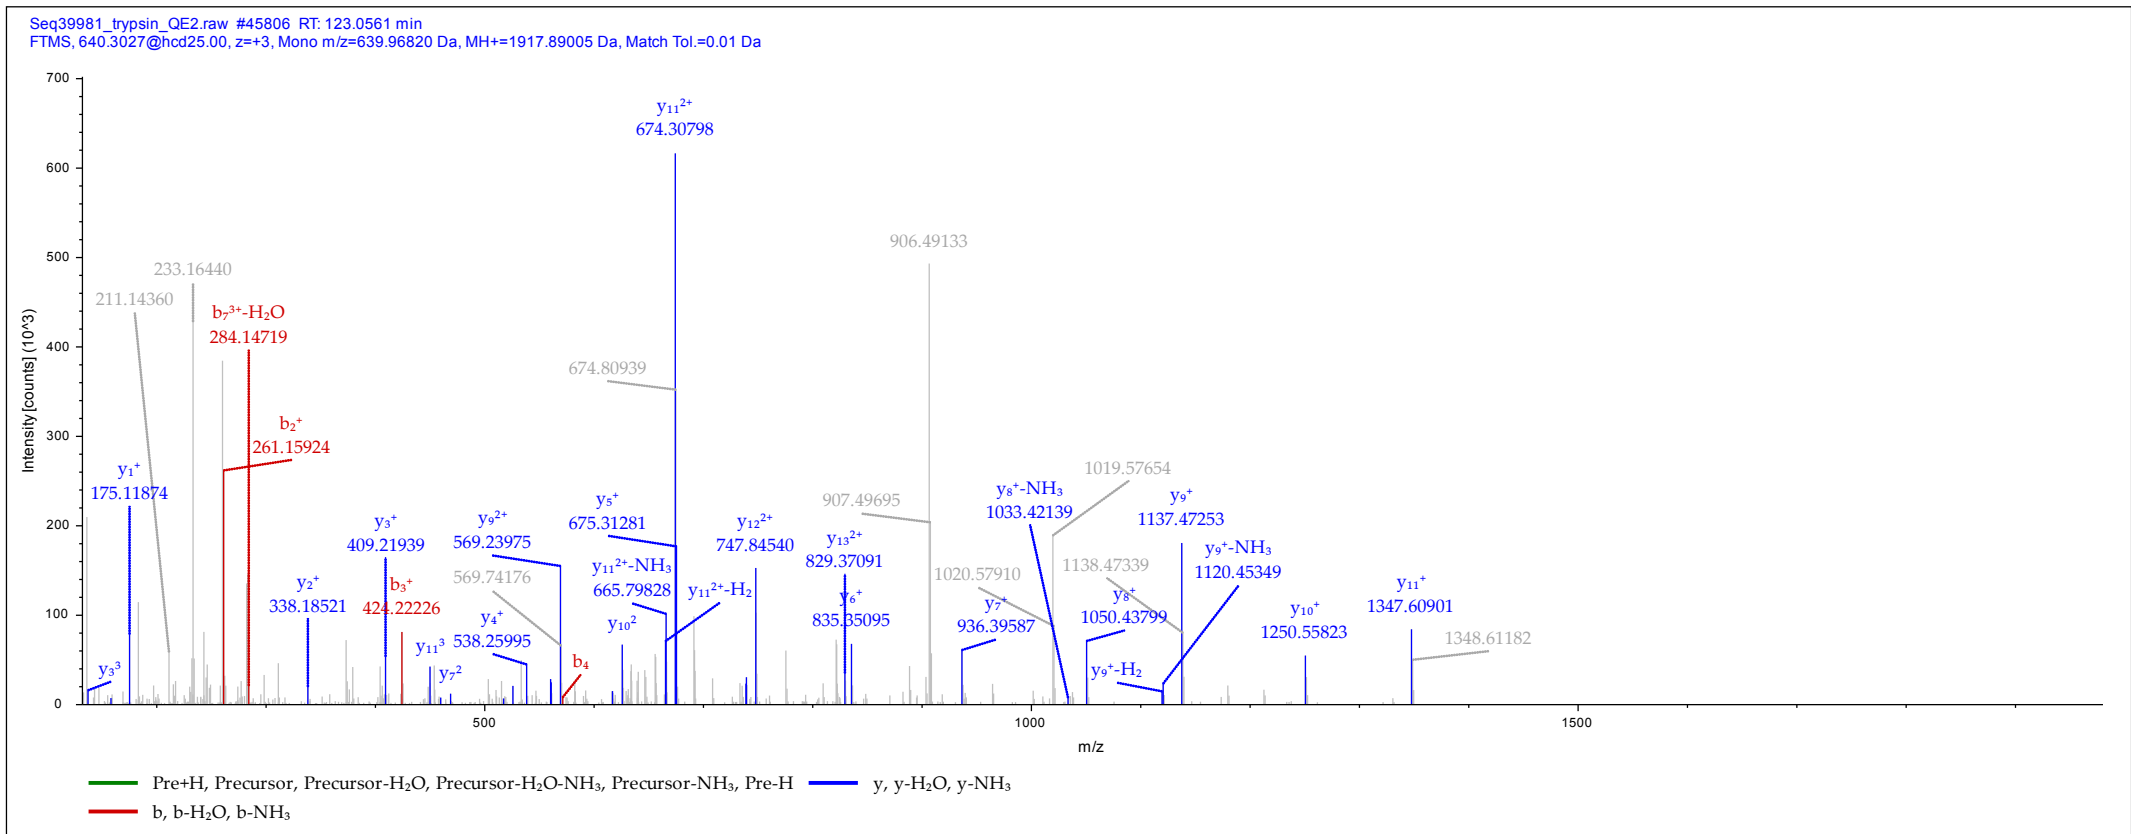



Sequence: AVYGFEIPNTLVGGTR, Charge: +2, Monoisotopic m/z: 847.44714 Da (-1.89 mmu/-2.23 ppm), MH+: 1693.88701 Da, RT: 138.2741 min, Identified with: Sequest HT (v1.17); XCorr:3.84, Percolator q-Value:0, Percolator PEP: 2.12e-05, Ions matched by search engine: 0/0  
 Fragment match tolerance used for search: 0.02 Da

Accession:  
 cds.comp37241\_c0\_seq3\_m.288938

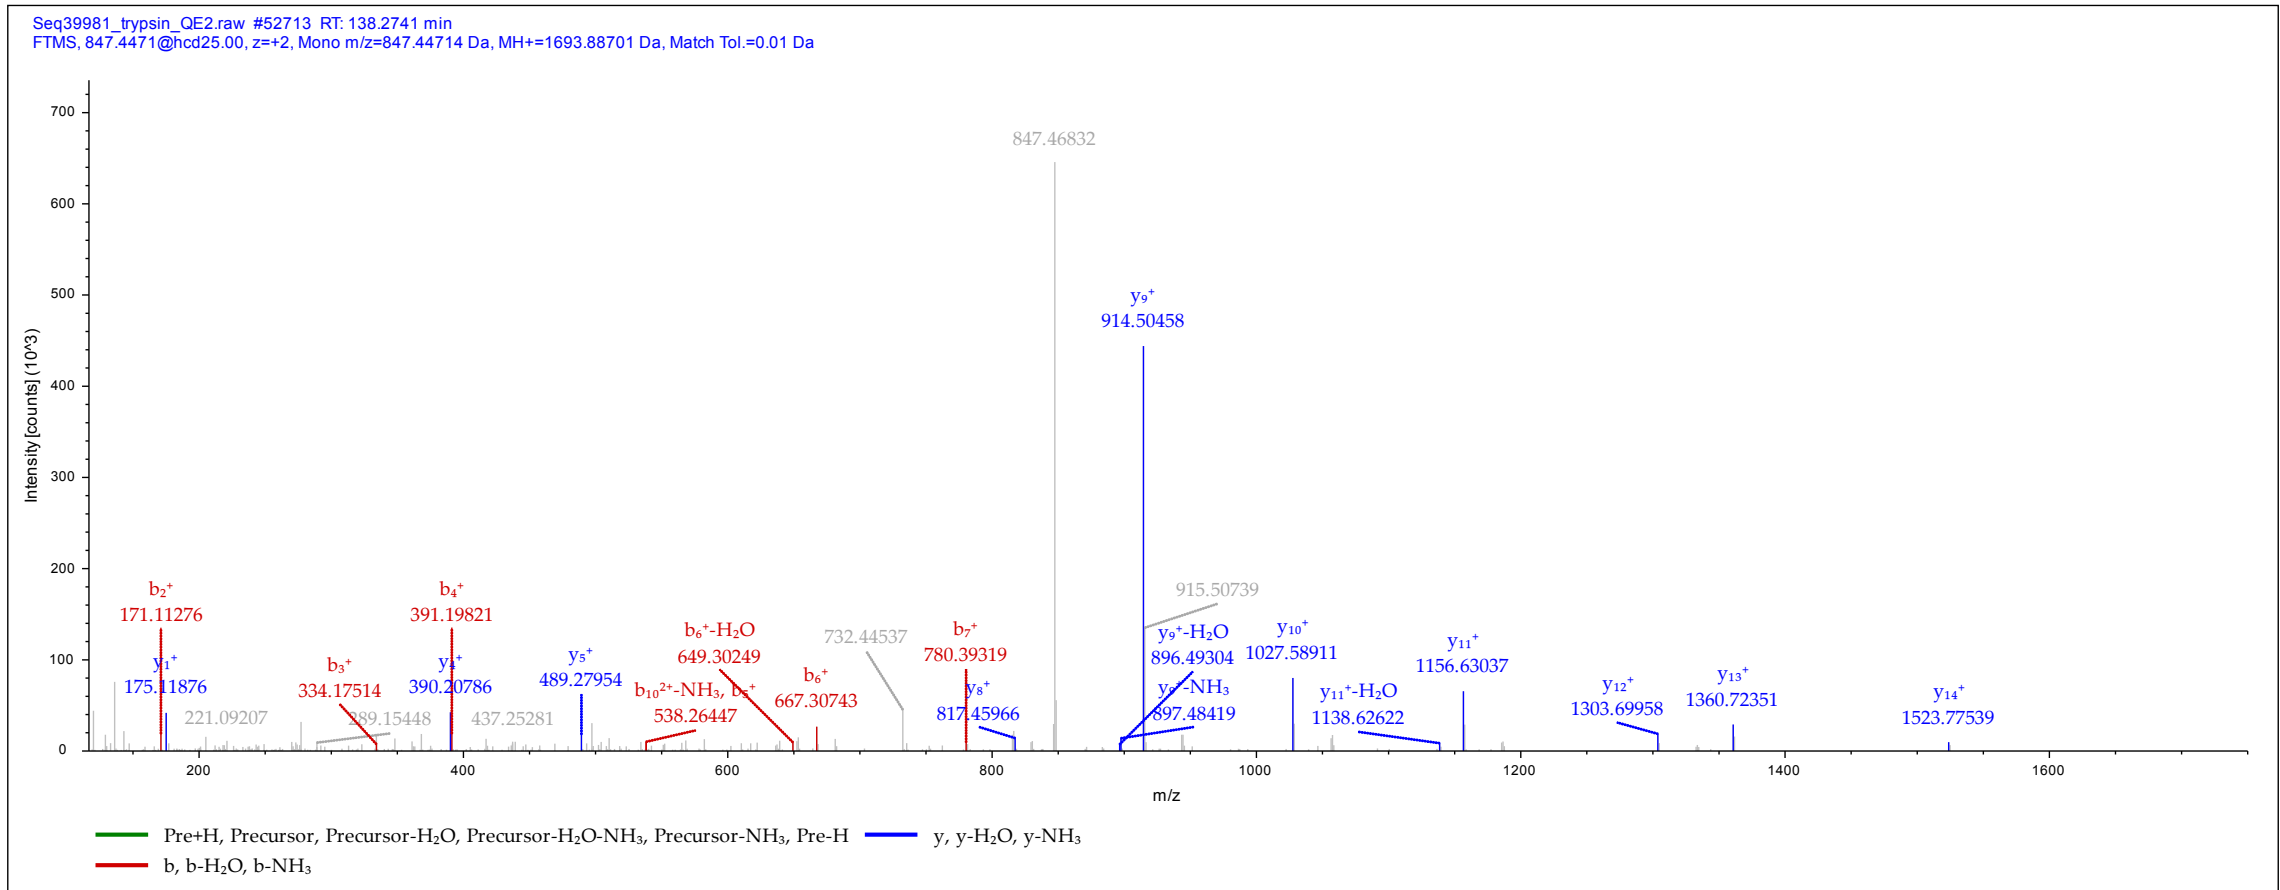

Sequence: NLDTAMNR, Charge: +2, Monoisotopic m/z: 467.72406 Da  
 (-0.12 mmu/-0.26 ppm), MH+: 934.44084 Da, RT: 56.5103 min,  
 Identified with: Sequest HT (v1.17); XCorr:2.07, Percolator q-Value:  
 0.00599, Percolator PEP:0.108, Ions matched by search engine: 0/0  
 Fragment match tolerance used for search: 0.02 Da

Accession:  
 cds.comp39265\_c3\_seq3\_m.392937

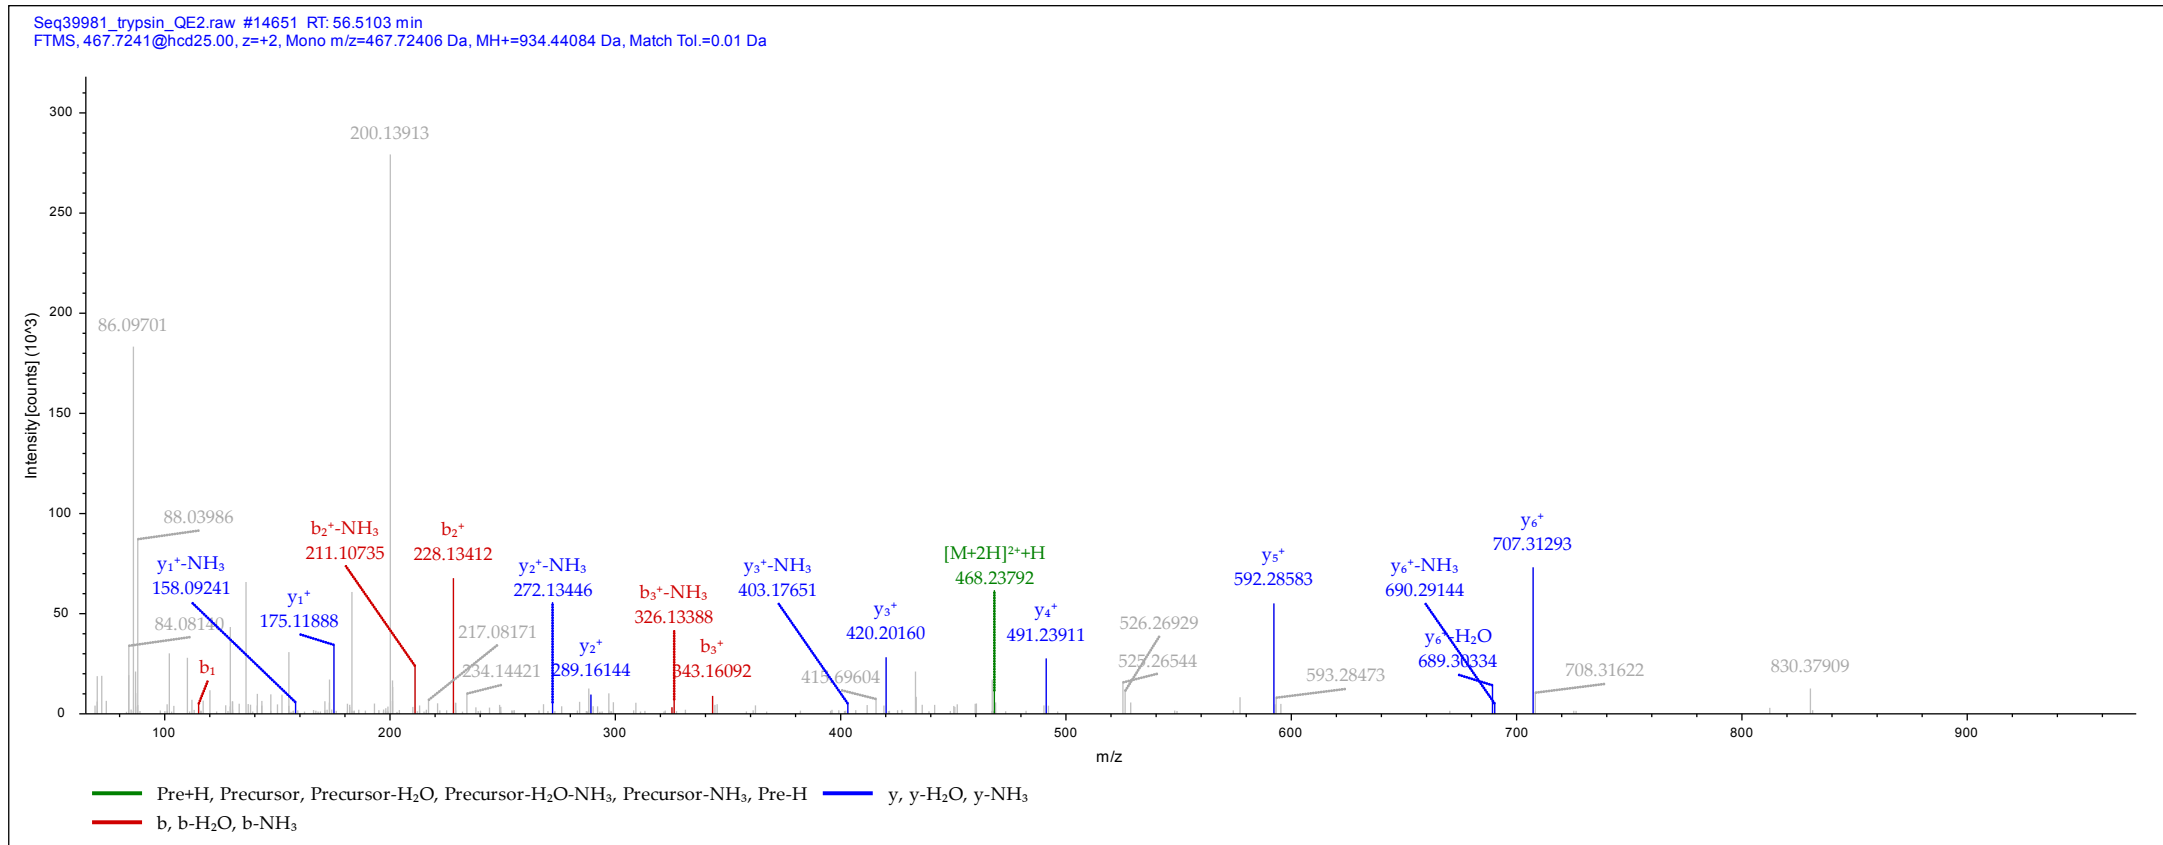



Sequence: DMYPNVFAVGK, Charge: +2, Monoisotopic m/z: 620.80774 Da (+2.57 mmu/+4.14 ppm), MH+: 1240.60820 Da, RT: 121.7277 min, Identified with: Sequest HT (v1.17); XCorr:1.94, Percolator q-Value:0.000713, Percolator PEP:0.0048, Ions matched by search engine: 0/0 Fragment match tolerance used for search: 0.02 Da

Accession:  
 cds.comp40233\_c0\_seq1\_m.500469

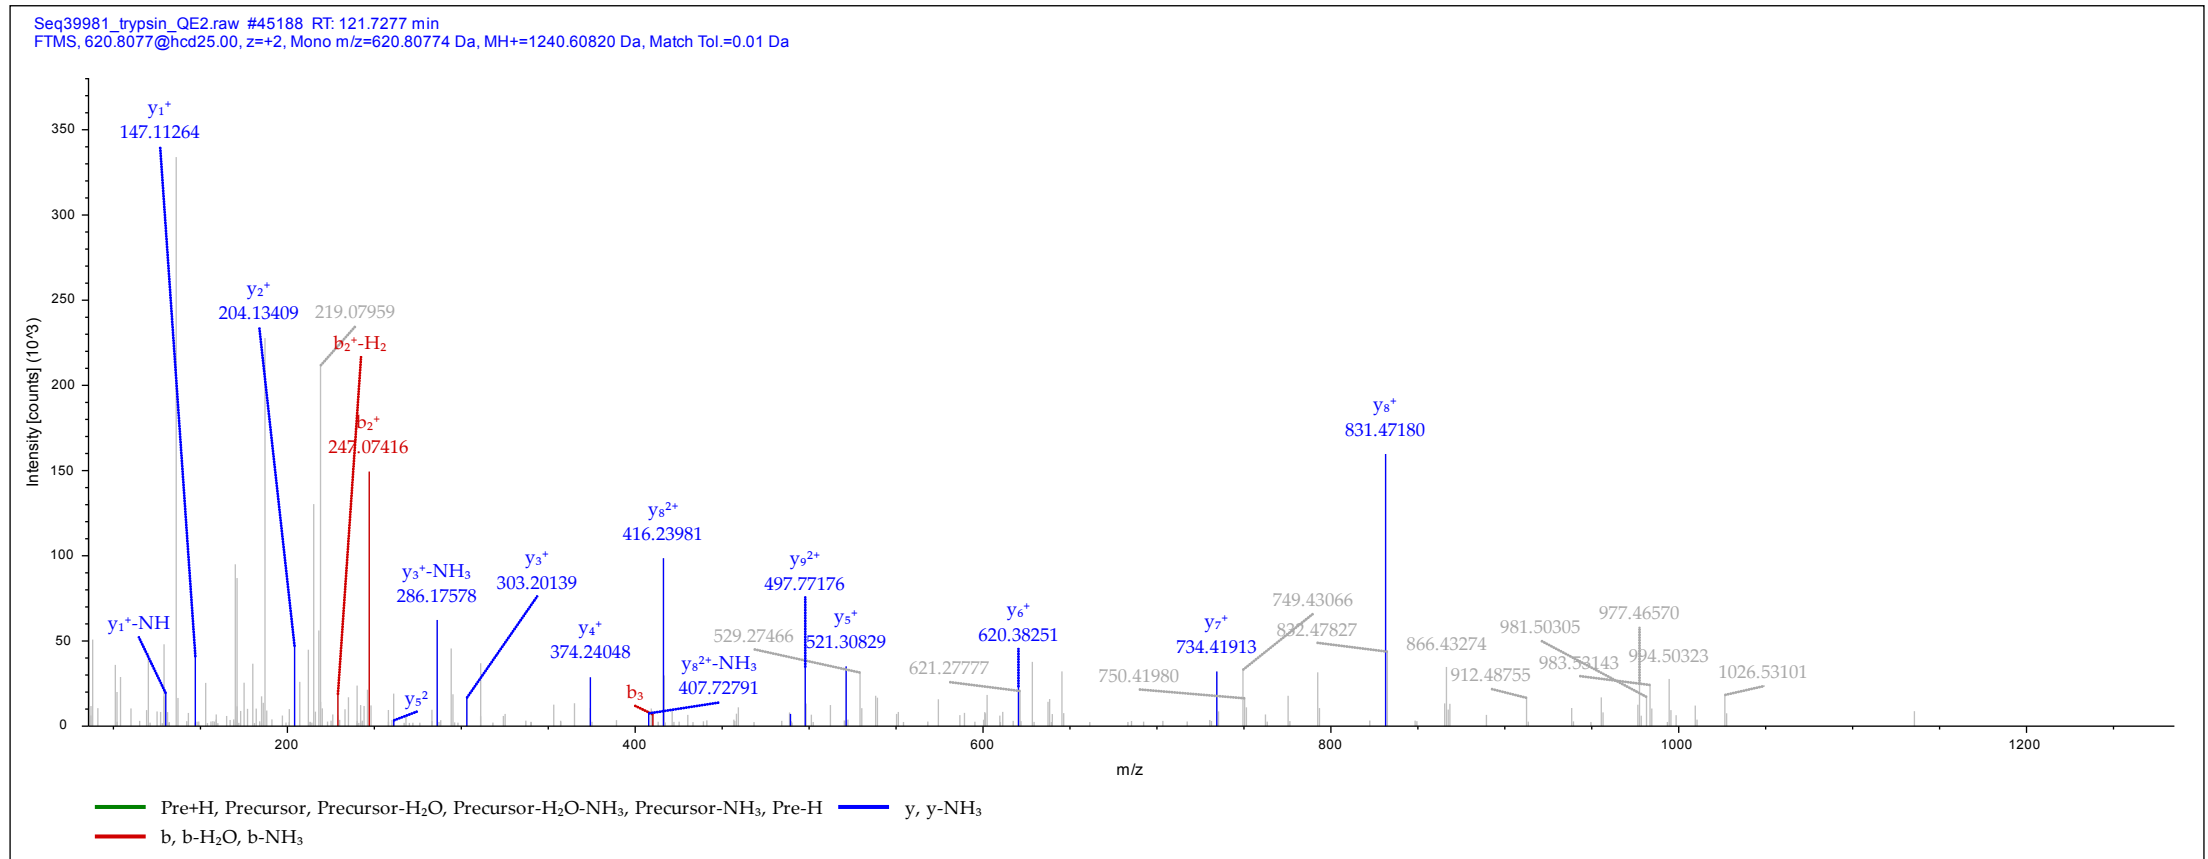

**Sequence: TSGTCINIR, C5-Carbamidomethyl (57.02146 Da)**  
**Charge: +2, Monoisotopic m/z: 511.25833 Da (-0.06 mmu/-0.12 ppm), MH+: 1021.50939 Da, RT: 45.0705 min,**  
**Identified with: Sequest HT (v1.17); XCorr:2.23, Percolator q-Value:0.000195, Percolator PEP:0.000621, Ions matched by search engine: 0/0**  
**Fragment match tolerance used for search: 0.02 Da**

**Accession:**  
**cds.comp41004\_c0\_seq7\_m.687978**

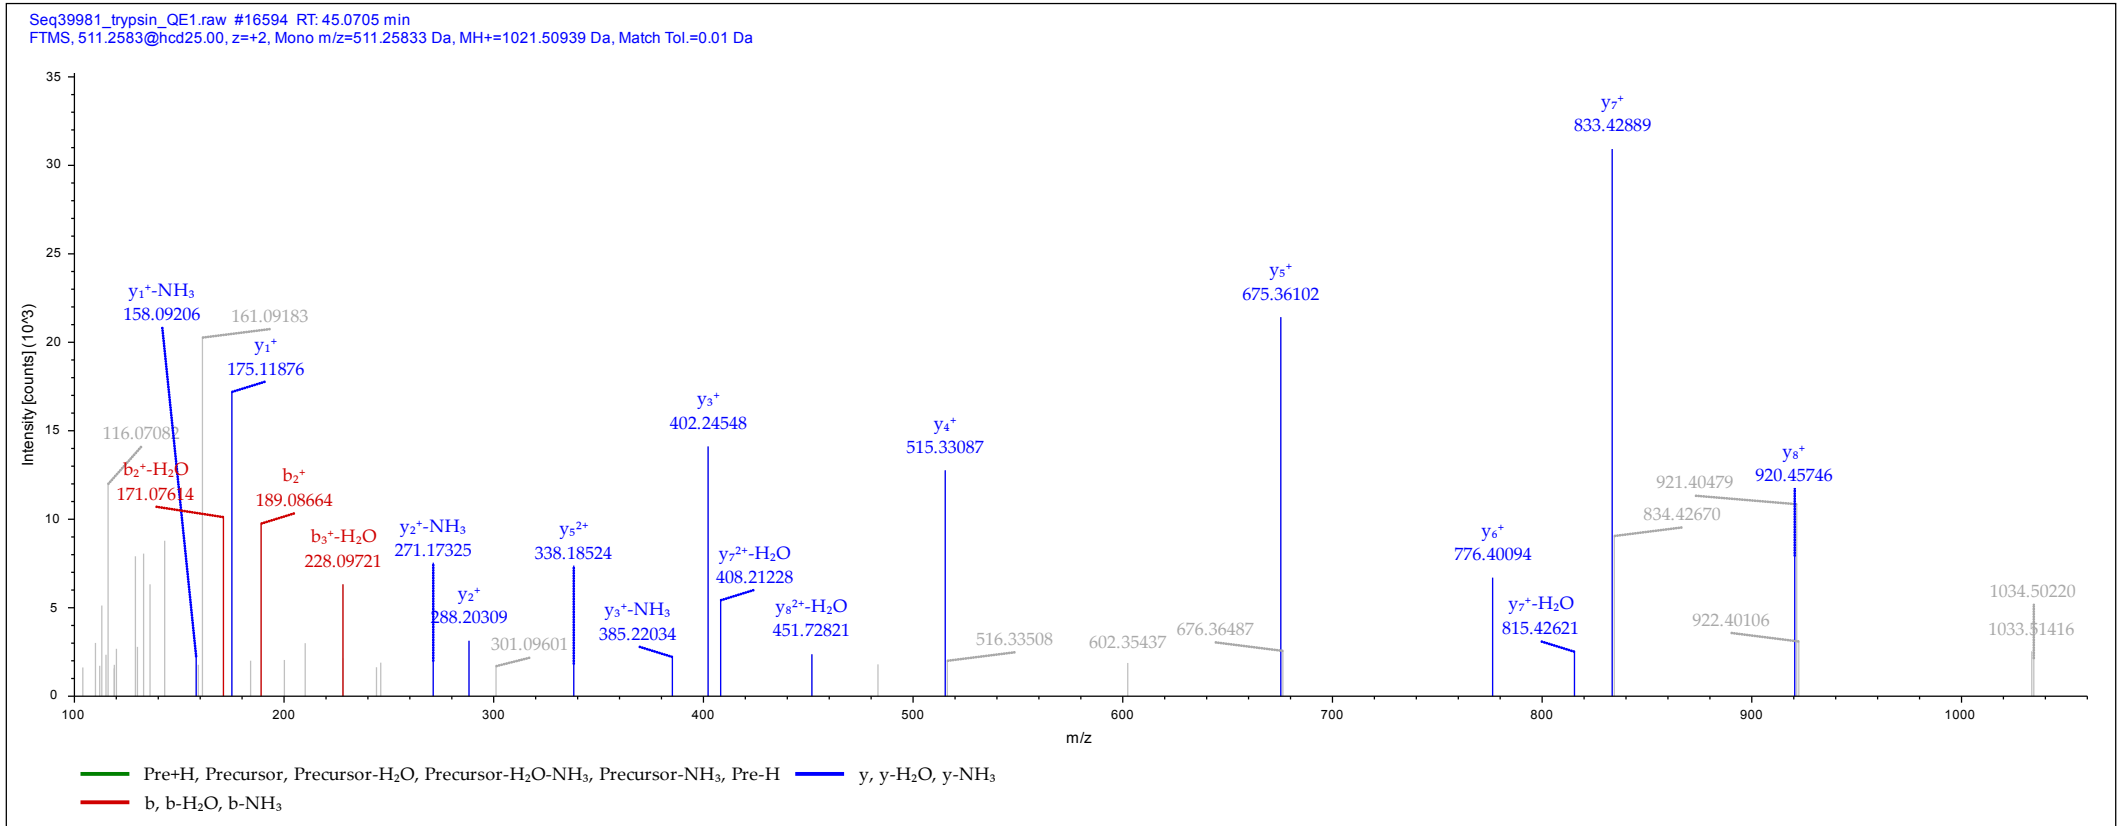

Sequence: AGLQFPVGR, Charge: +2, Monoisotopic m/z: 472.77014 Da (+0.89 mmu/+1.88 ppm), MH+: 944.53301 Da, RT: 25.0314 min, Identified with: Sequest HT (v1.17); XCorr:2.74, Percolator q-Value:0.00675, Percolator PEP:0.186, Ions matched by search engine: 0/0 Fragment match tolerance used for search: 0.5 Da

Accession:  
 cds.comp39051\_c0\_seq2\_m.375858

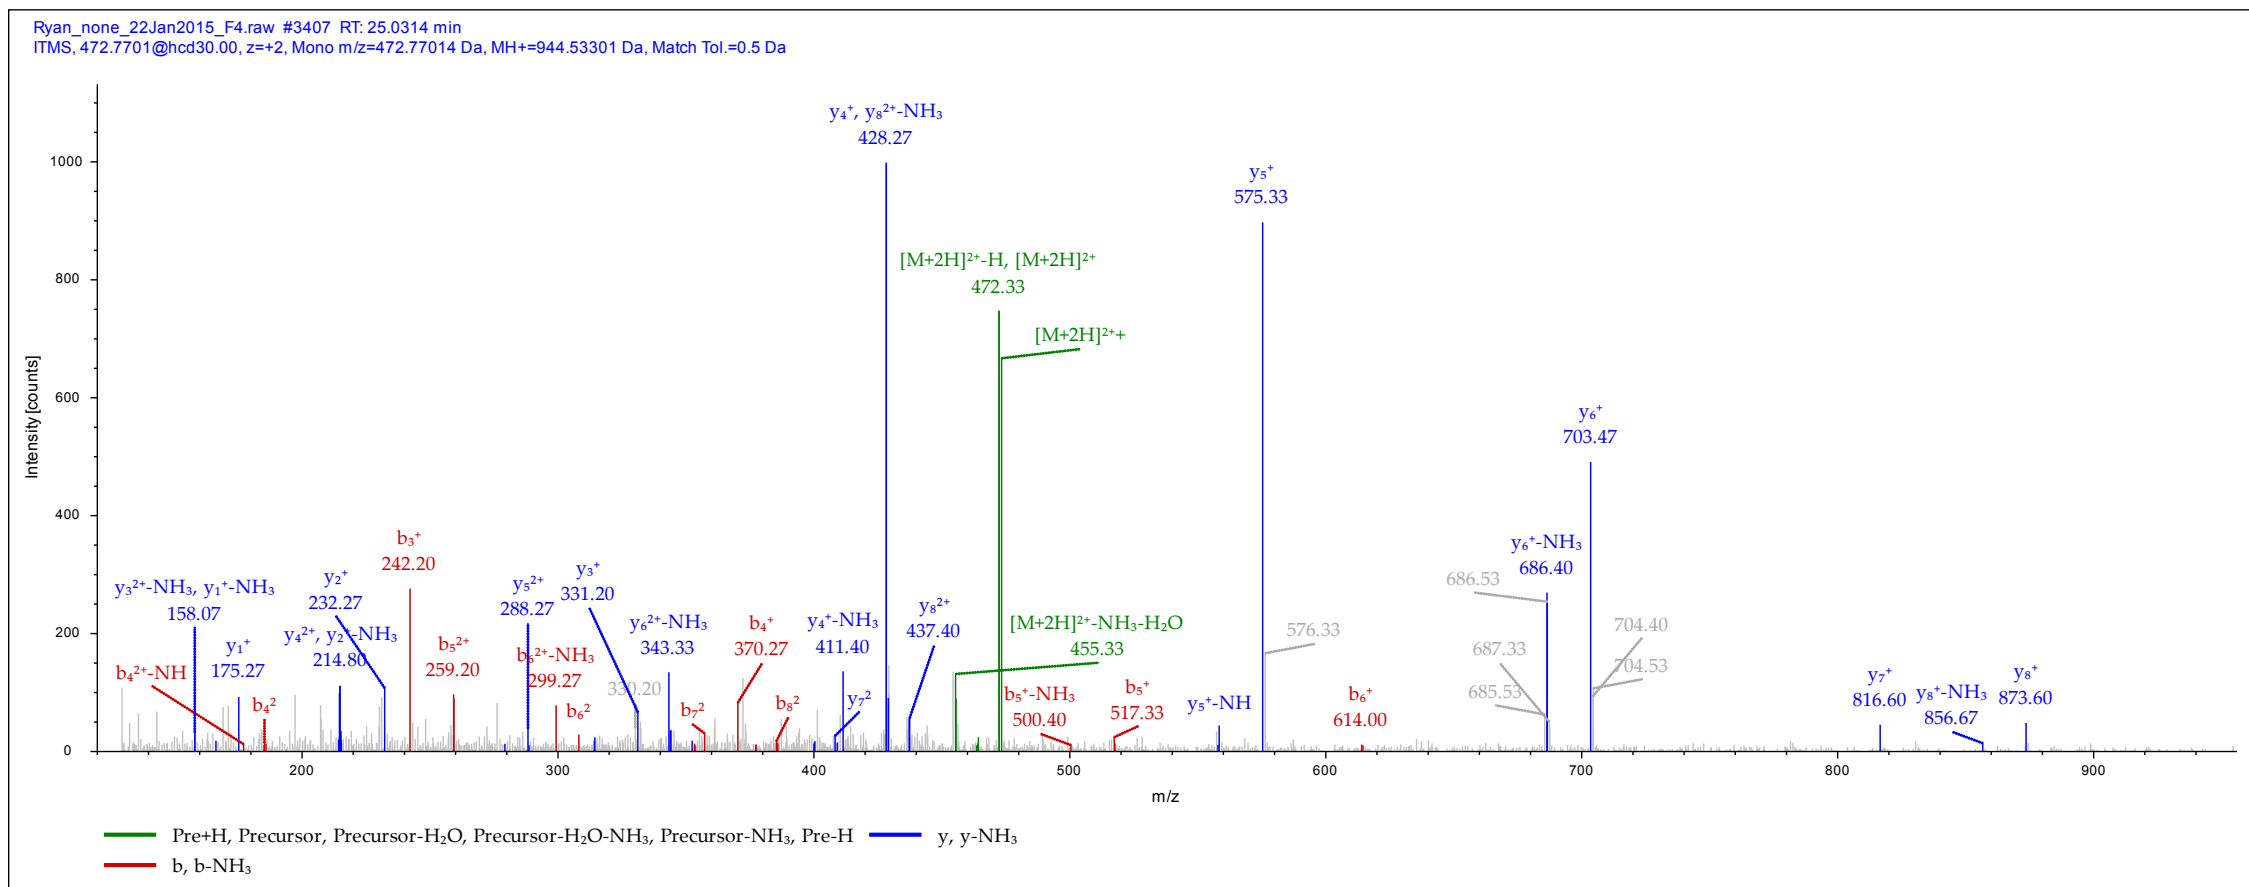

Sequence: FRQYNQFDGLPGRLQ, Charge: +2, Monoisotopic m/z: 919.97235 Da  
 (+3.89 mmu/+4.23 ppm), MH+: 1838.93743 Da, RT: 25.6925 min,  
 Identified with: Sequest HT (v1.17); XCorr:4.26, Percolator q-Value:0.00867,  
 Percolator PEP:0.217, Ions matched by search engine: 0/0  
 Fragment match tolerance used for search: 0.5 Da

Accession:  
 cds.comp22974\_c0\_seq1\_m.90268

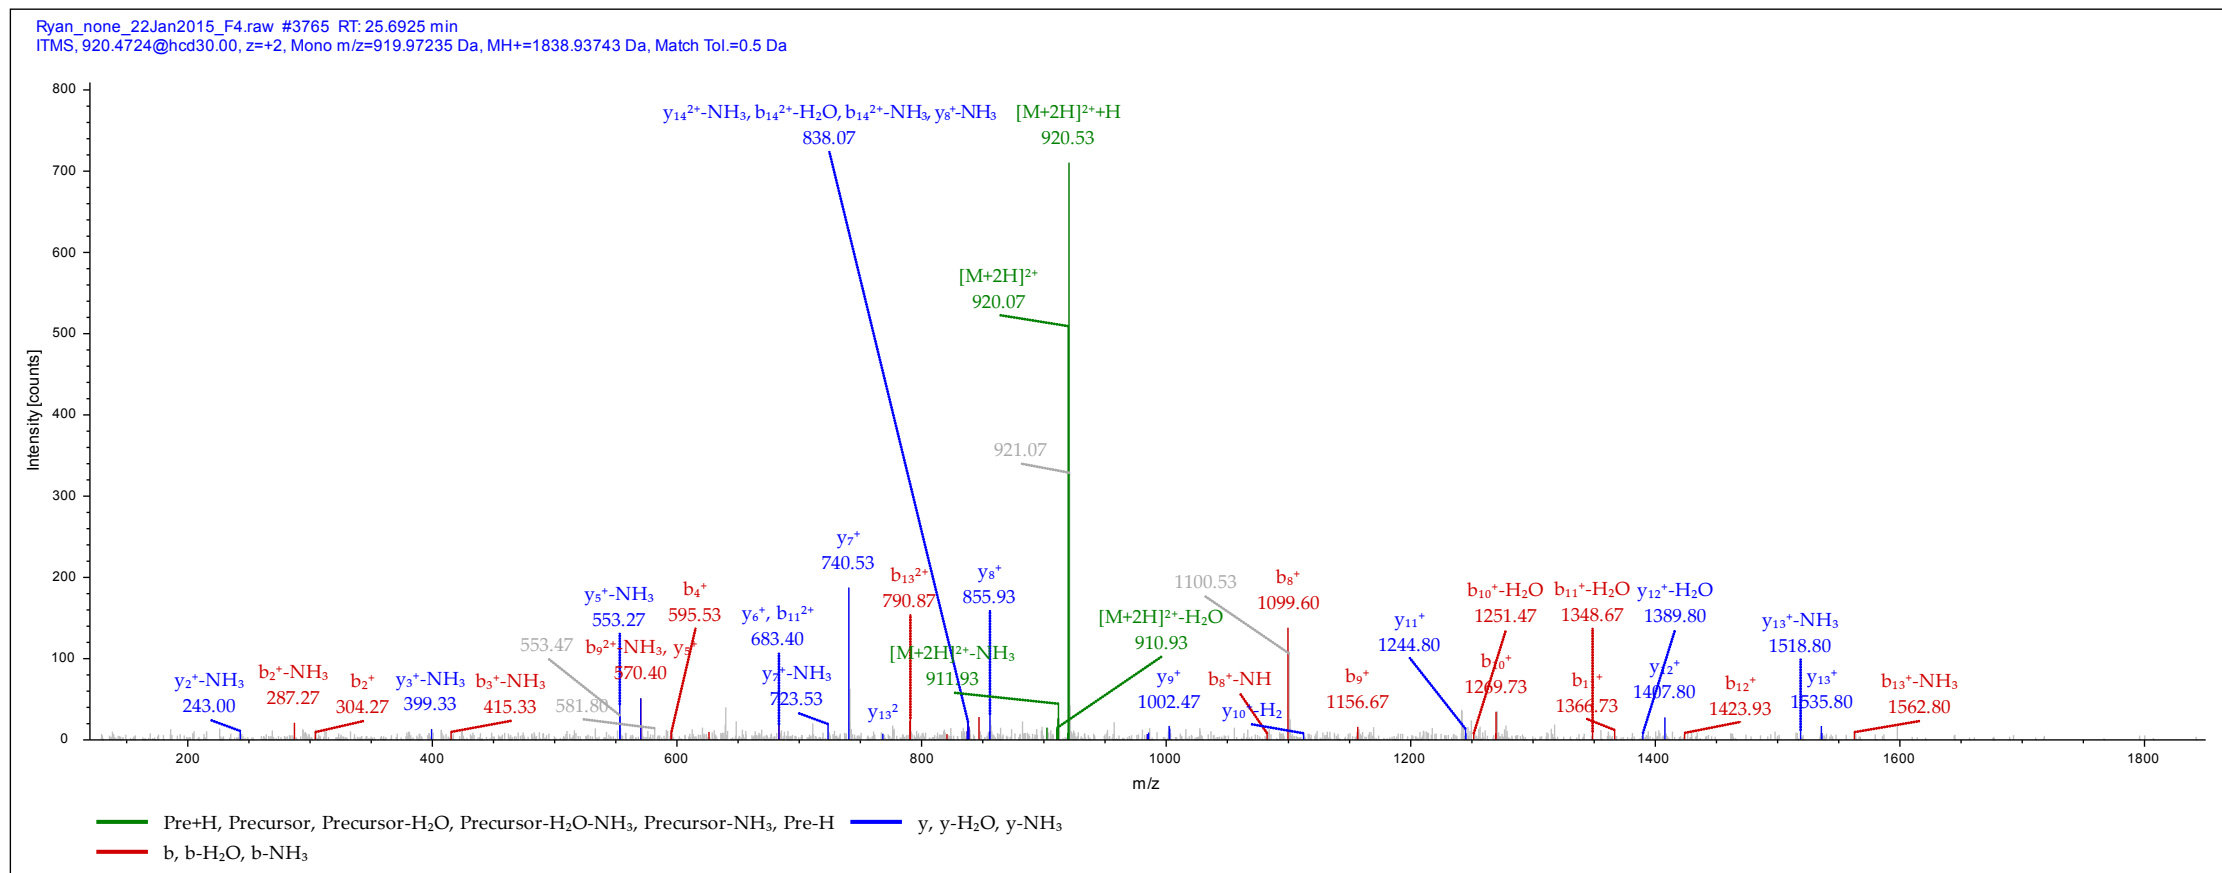

Sequence: IVEPEAESERSGA, Charge: +2, Monoisotopic m/z: 687.33374 Da (+2.95 mmu/+4.29 ppm), MH+: 1373.66020 Da, RT: 17.1480 min, Identified with: Sequest HT (v1.17); XCorr:3.08, Percolator q-Value:0.00134, Percolator PEP:0.0874, Ions matched by search engine: 0/0  
 Fragment match tolerance used for search: 0.5 Da

Accession:  
 cds.comp40863\_c1\_seq3\_m.644115

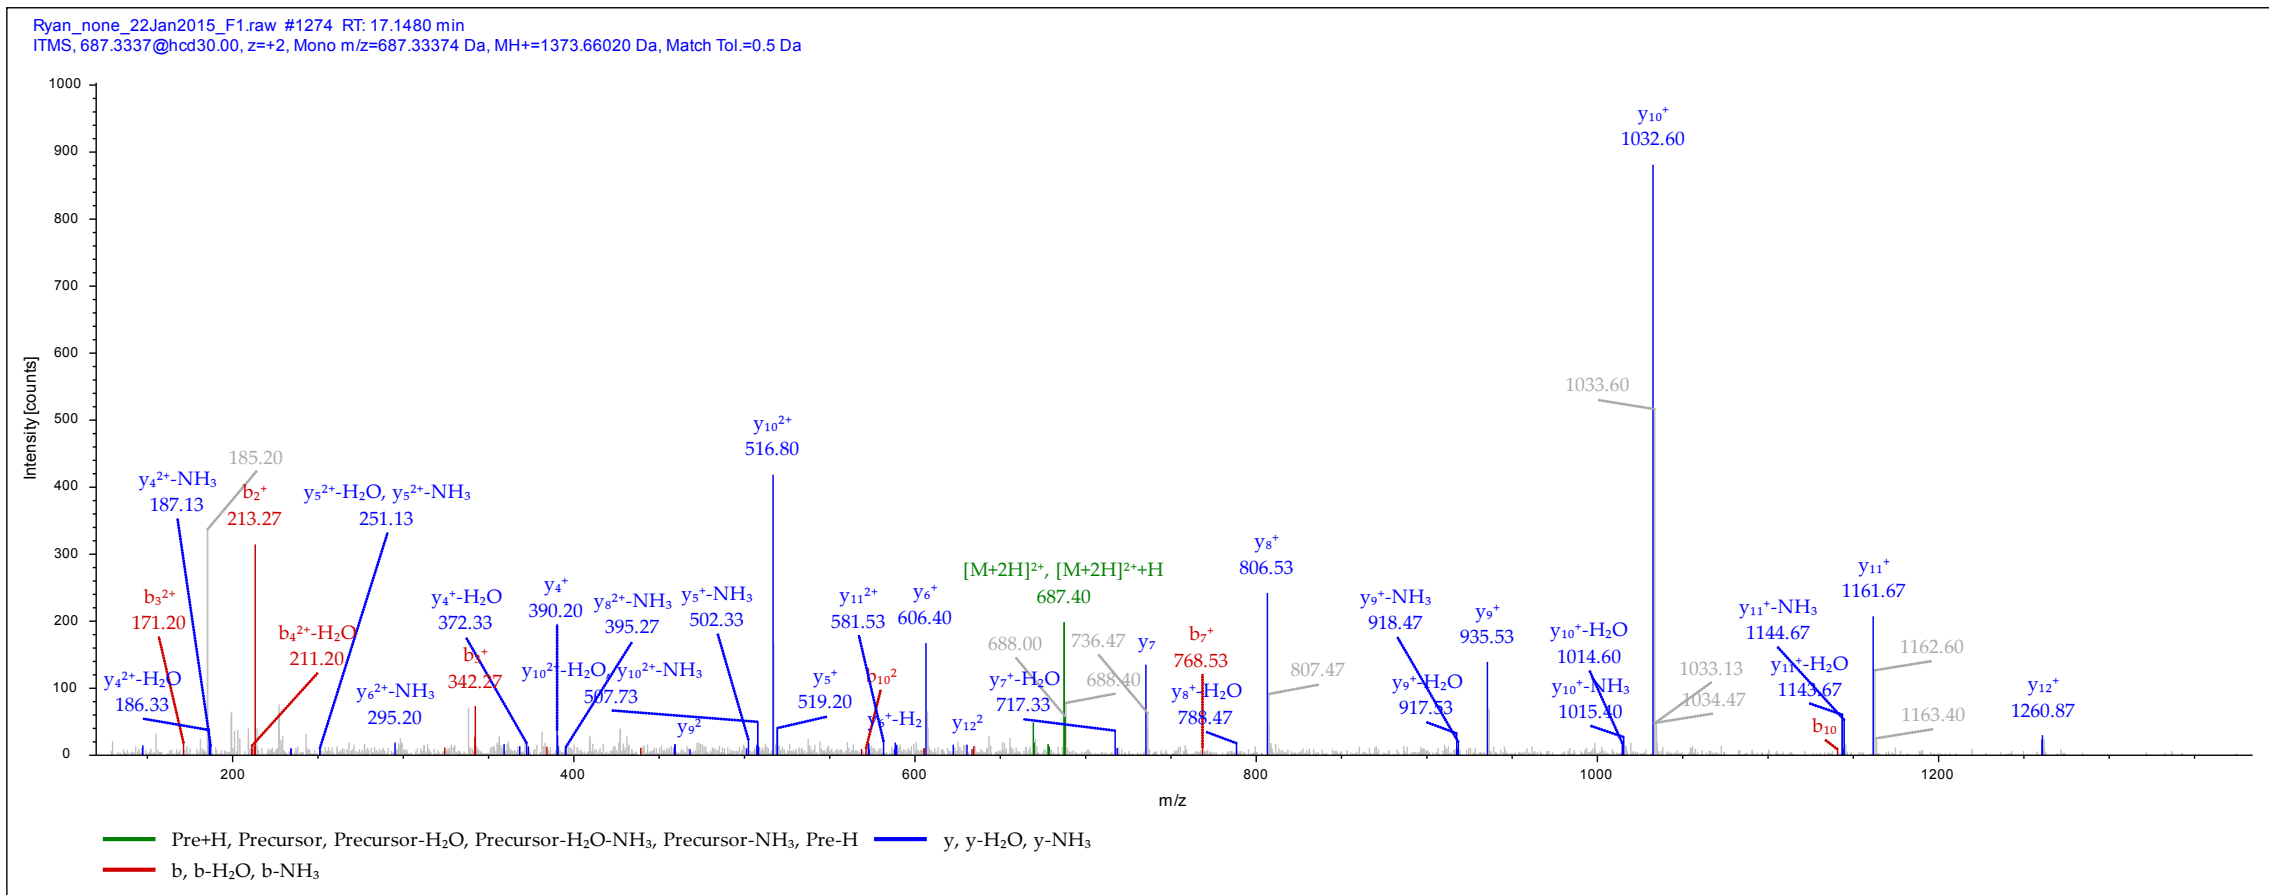



Sequence: NFPEIDDSSIAIVR, Charge: +2, Monoisotopic m/z: 788.40723 Da  
 (+2.93 mmu/+3.72 ppm), MH+: 1575.80718 Da, RT: 29.0599 min,  
 Identified with: Sequest HT (v1.17); XCorr:3.24, Percolator q-Value:0,  
 Percolator PEP:0.0139, Ions matched by search engine: 0/0  
 Fragment match tolerance used for search: 0.5 Da

Accession:  
 cds.comp23050\_c0\_seq1\_m.91136

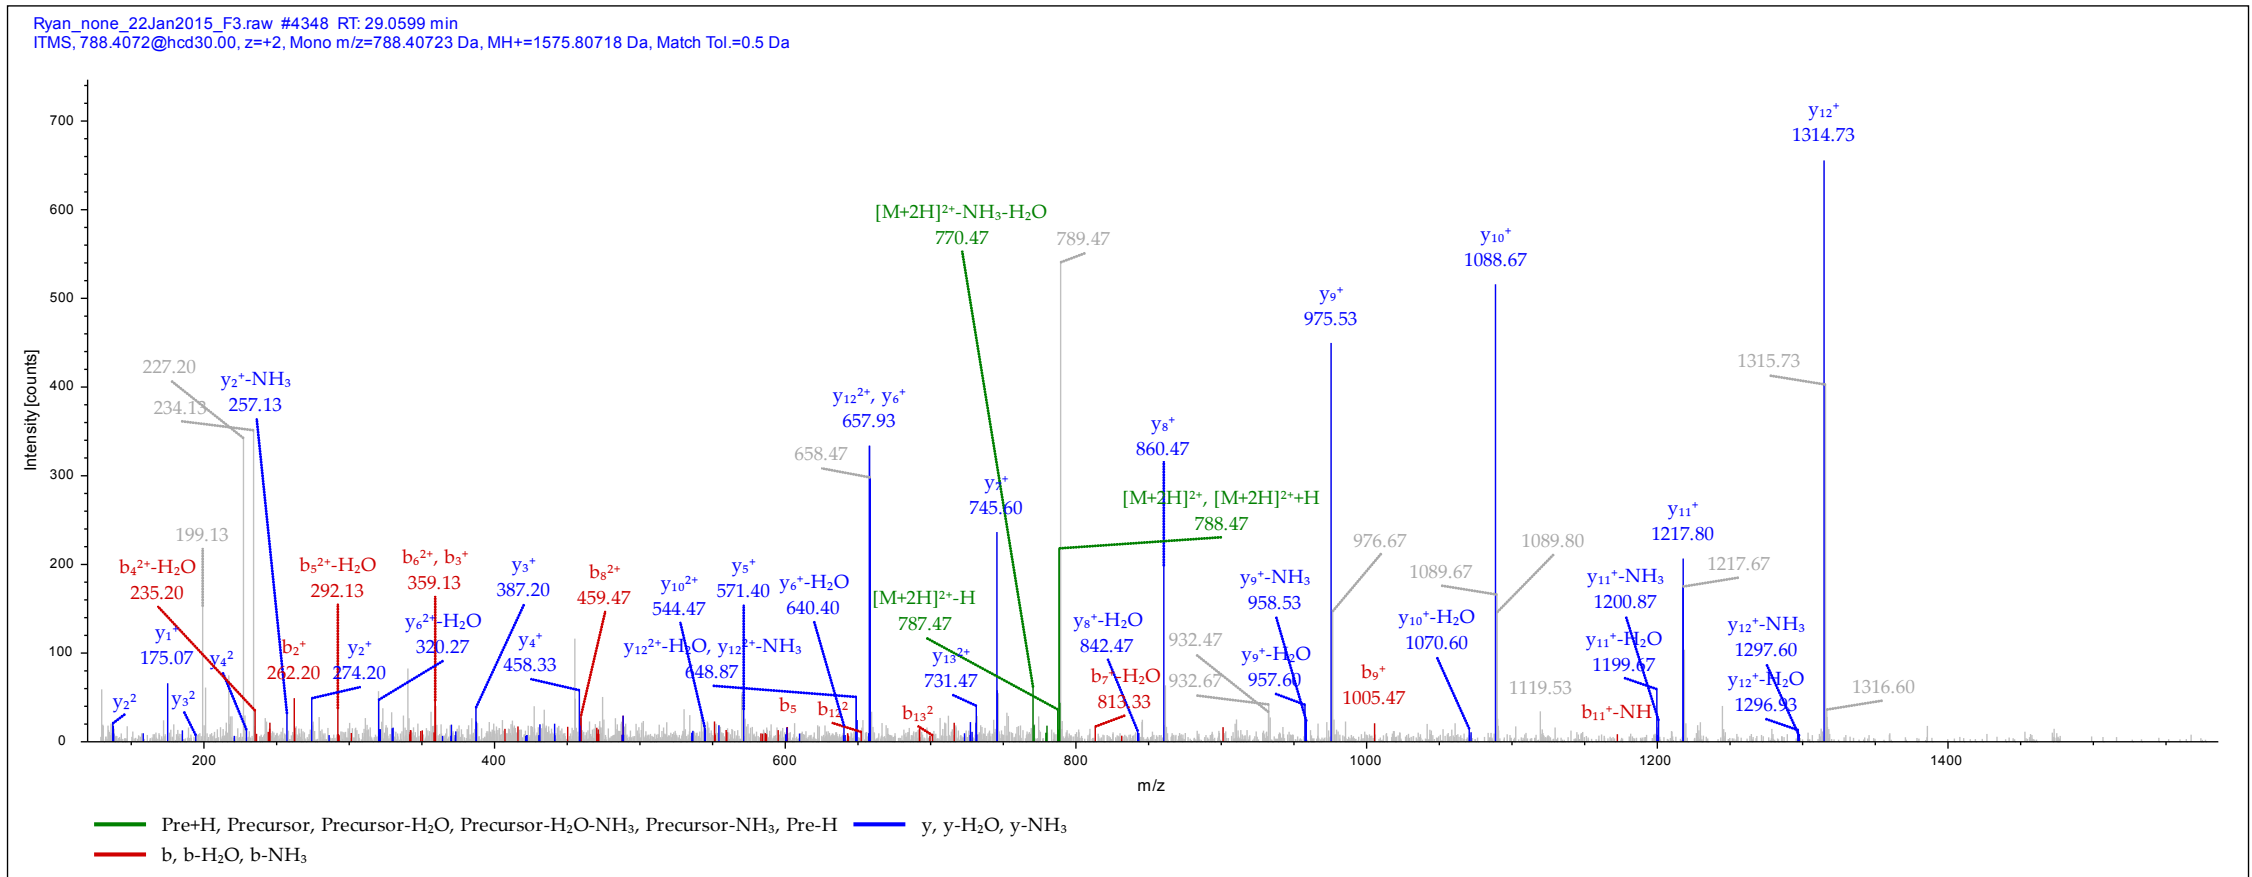

Sequence: SRTYADDVSADETEIQPR, Charge: +3, Monoisotopic m/z: 684.98914 Da (+2 mmu/  
+2.92 ppm), MH+: 2052.95285 Da, RT: 21.3851 min,  
Identified with: Sequest HT (v1.17); XCorr:4.26, Percolator q-Value:0, Percolator PEP:0.0111,  
Ions matched by search engine: 0/0  
Fragment match tolerance used for search: 0.5 Da

Accession:  
cds.comp22398\_c1\_seq1\_m.81361

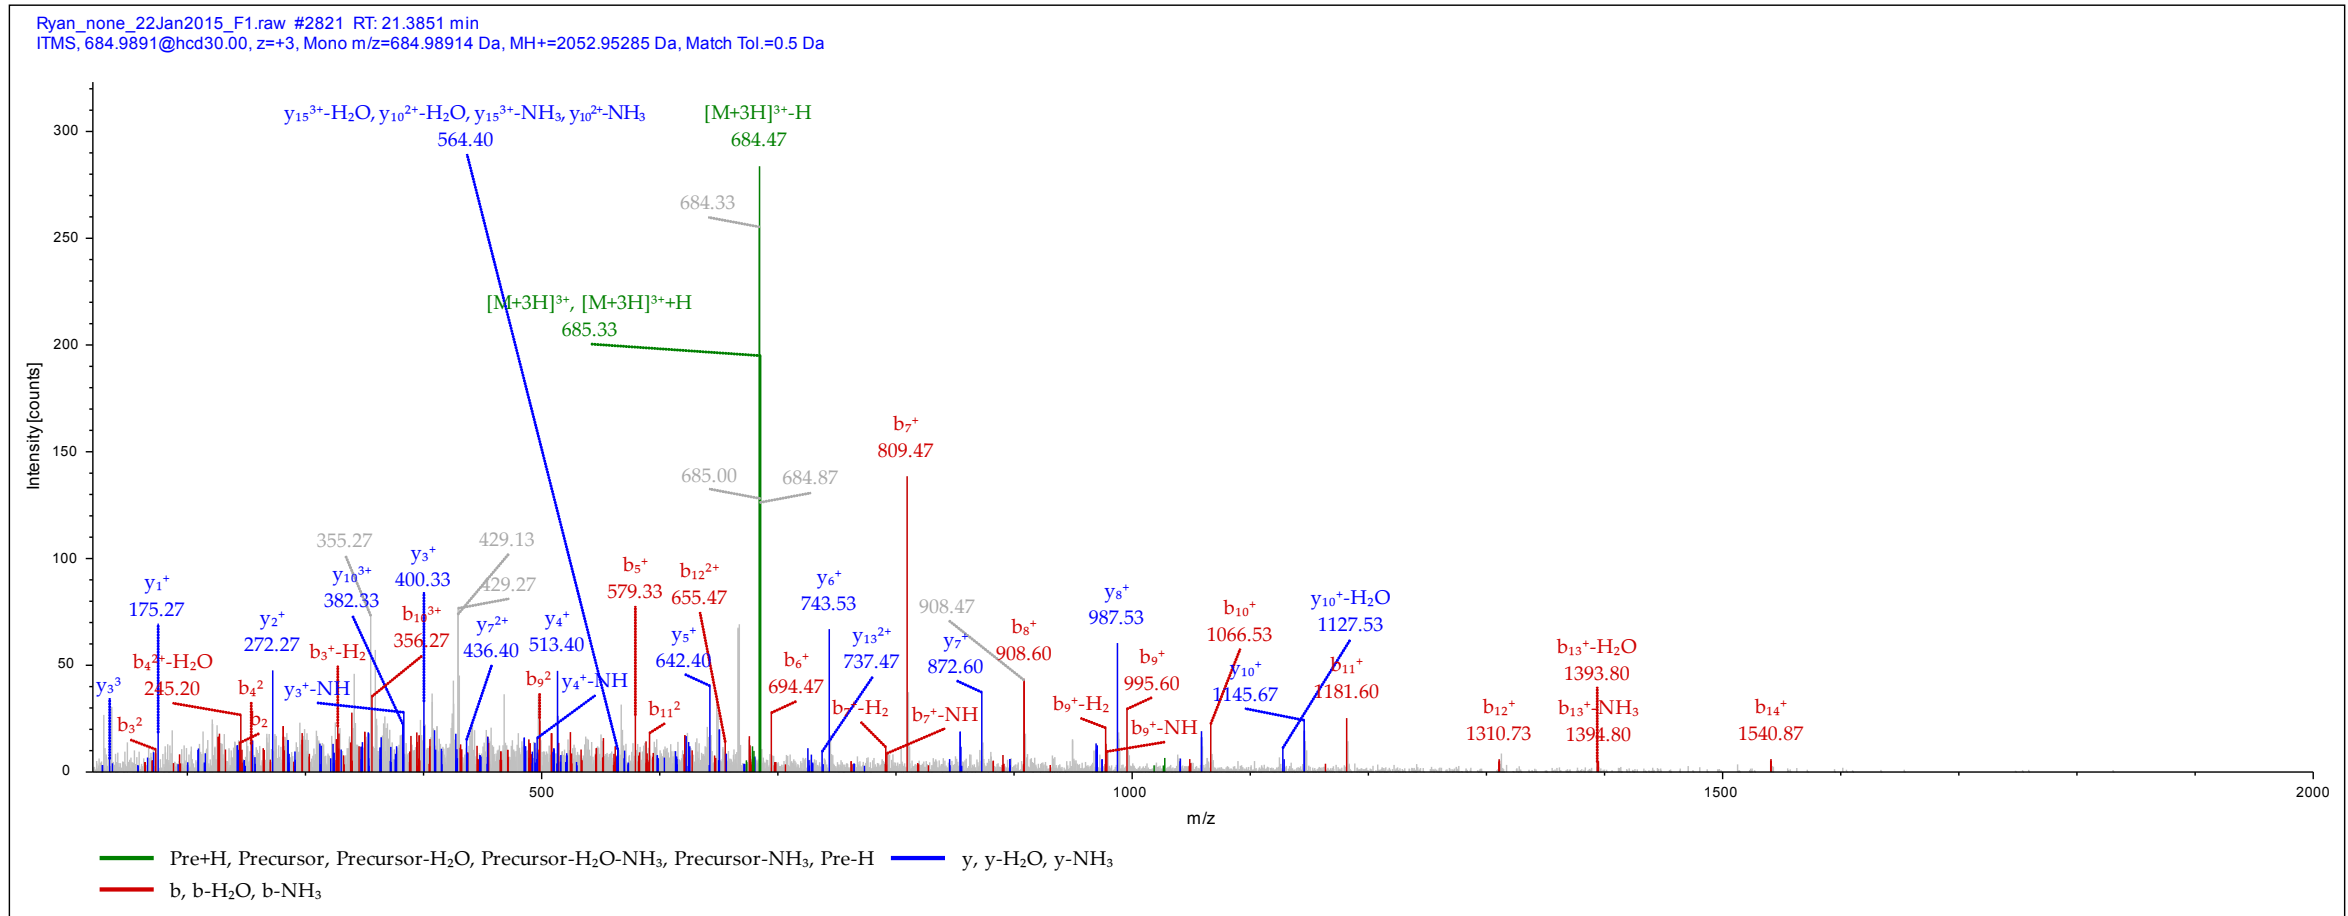

Sequence: YNHDNVPNLPEASTL, Charge: +2, Monoisotopic m/z: 842.40668 Da (+4.4 mmu/+5.22 ppm), MH+: 1683.80608 Da, RT: 25.9580 min, Identified with: Sequest HT (v1.17); XCorr:4.09, Percolator q-Value:0.00867, Percolator PEP:0.212, Ions matched by search engine: 0/0  
 Fragment match tolerance used for search: 0.5 Da

Accession:  
 cds.comp6738\_c0\_seq1\_m.22462

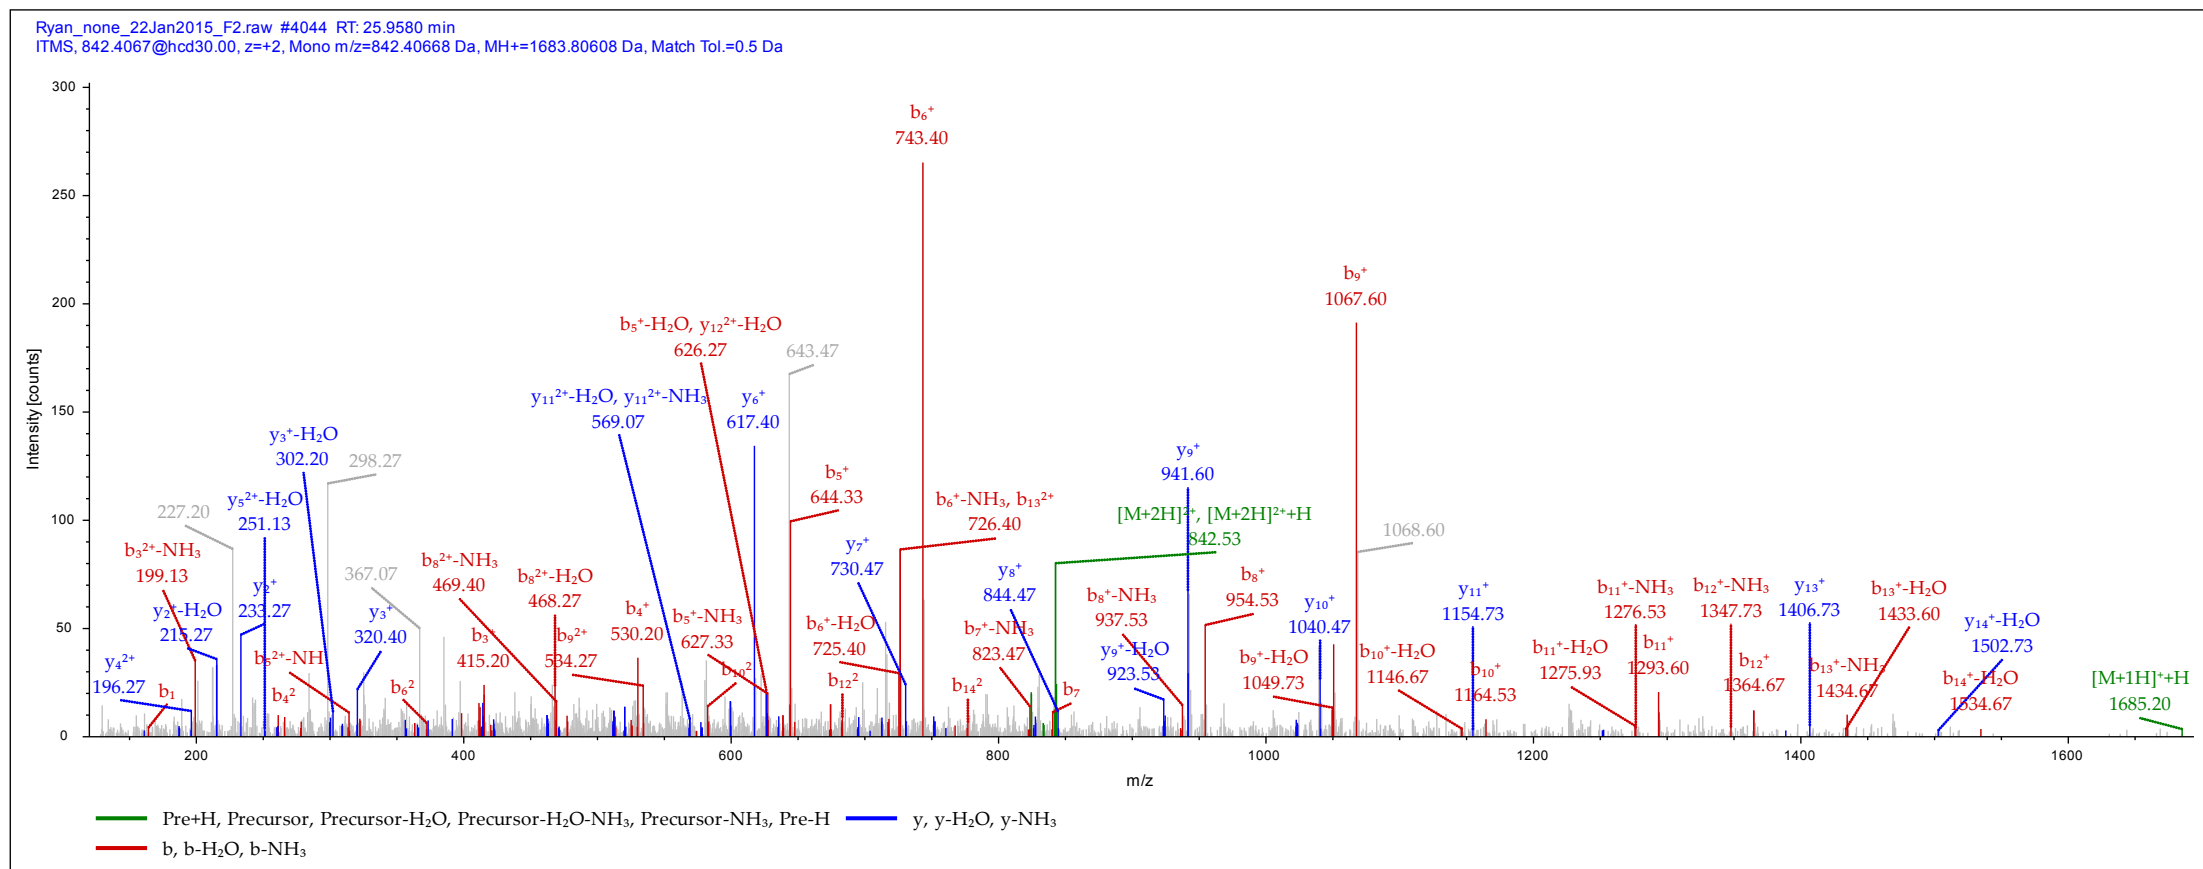

**Sequence: DDLKLEQVNVVFRHGD, Charge: +3, Monoisotopic m/z: 628.65790 Da**  
**(-0.62 mmu/-0.99 ppm), MH+: 1883.95914 Da, RT: 70.6879 min,**  
**Identified with: Sequest HT (v1.17); XCorr:5.36, Percolator q-Value:0, Percolator**  
**PEP:0.000174, Ions matched by search engine: 0/0**  
**Fragment match tolerance used for search: 0.02 Da**

Accession:  
 cds.comp6732\_c0\_seq1\_m.22296

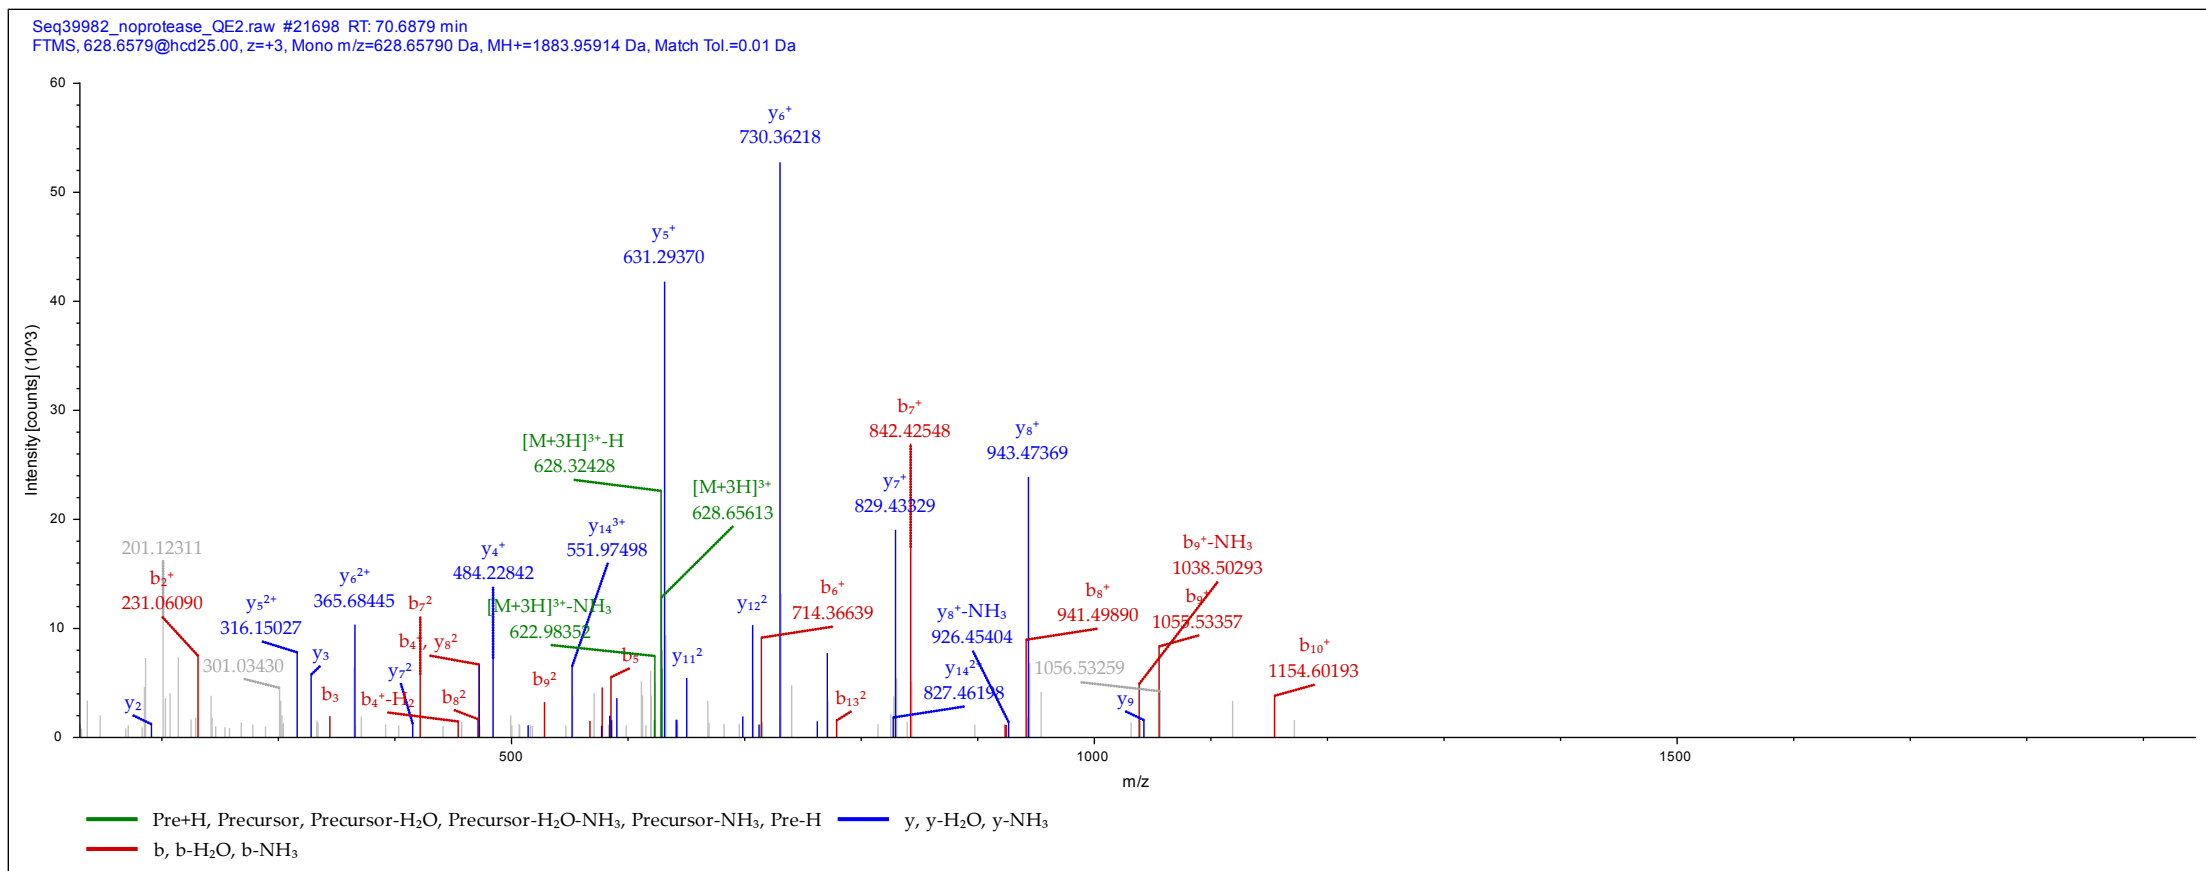



Sequence: ISDLESGELKQDNLLN, Charge: +2, Monoisotopic m/z: 894.45758 Da (+2.87 mmu/+3.21 ppm), MH+: 1787.90788 Da, RT: 25.5063 min, Identified with: Sequest HT (v1.17); XCorr:5.03, Percolator q-Value:0, Percolator PEP:0.0599, Ions matched by search engine: 0/0 Fragment match tolerance used for search: 0.5 Da

Accession:  
cds.comp41324\_c0\_seq1\_m.795776

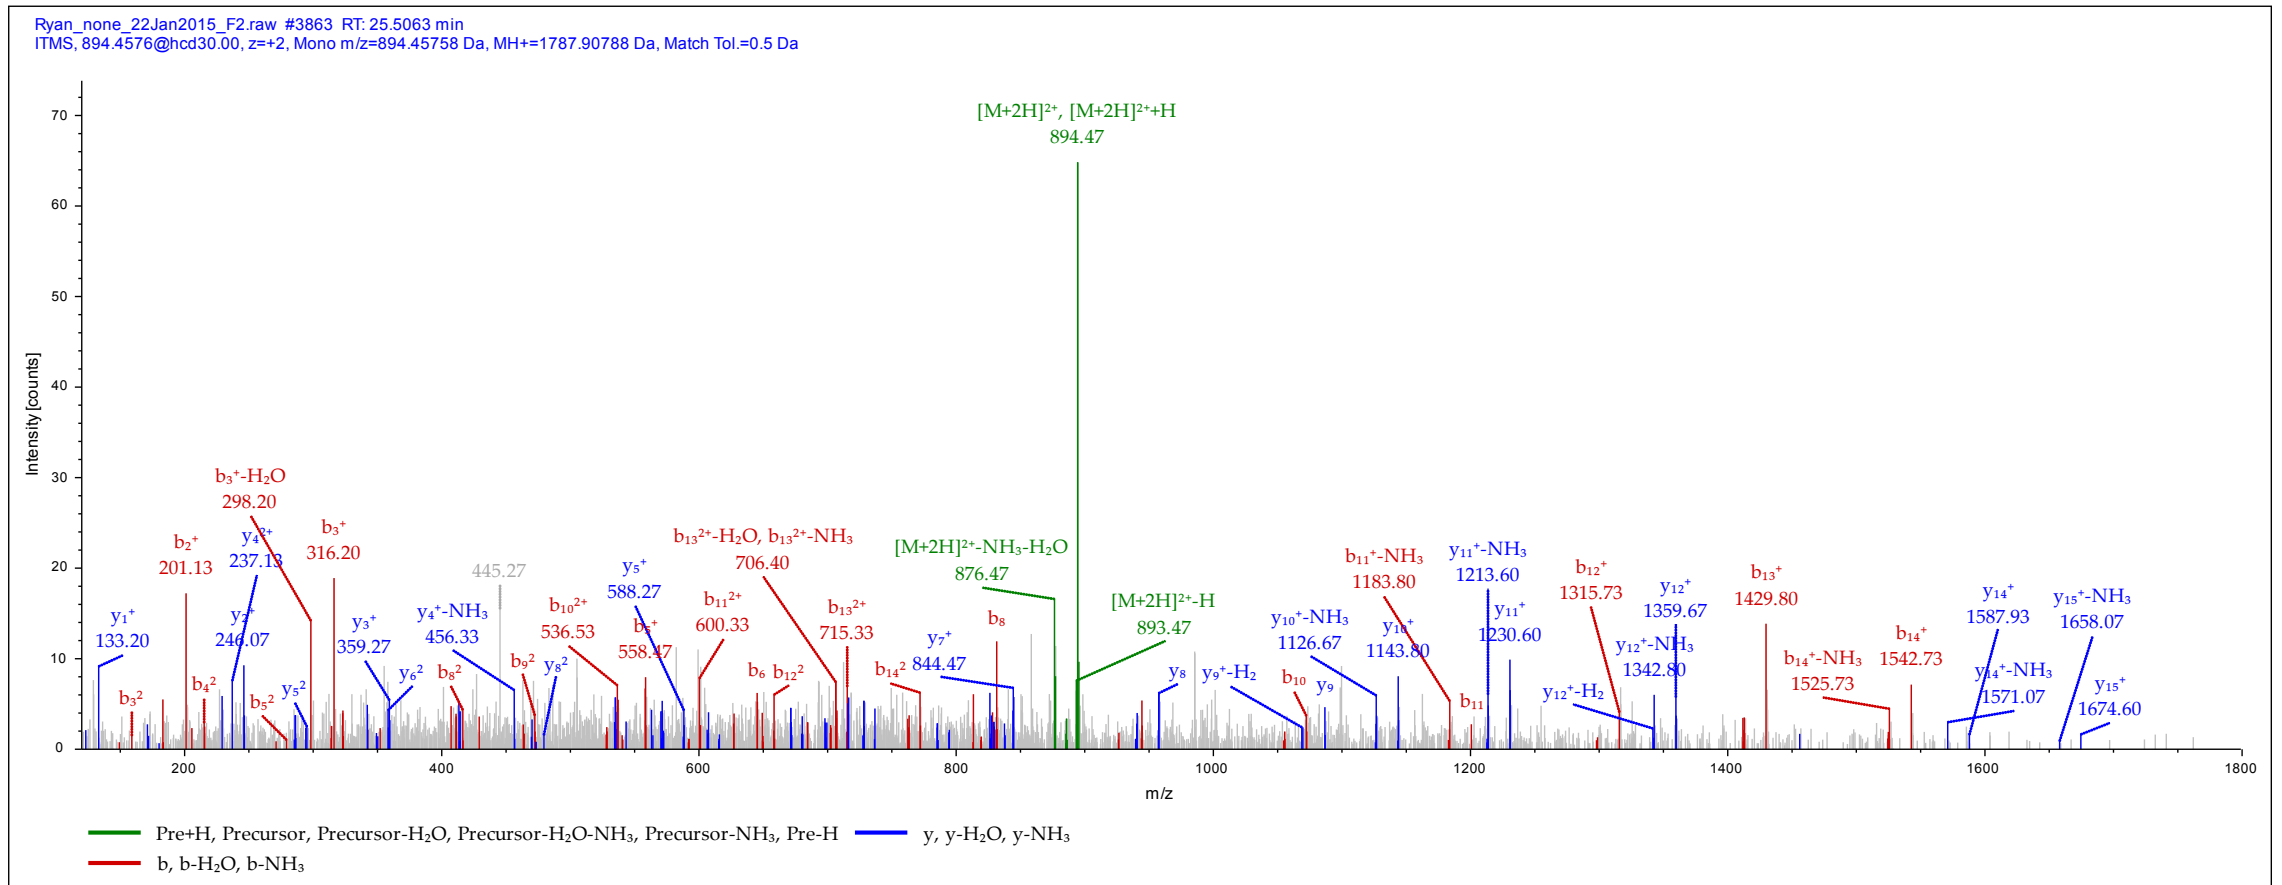

Sequence: NAAVELAAKMPNA, M11-Oxidation (15.99492 Da)  
 Charge: +2, Monoisotopic m/z: 693.85944 Da (+3.51 mmu/+5.06 ppm), MH+: 1386.71160 Da, RT: 20.1942 min,  
 Identified with: Sequest HT (v1.17); XCorr:2.79, Percolator q-Value:0, Percolator PEP:0.00848, Ions matched by search engine: 0/0  
 Fragment match tolerance used for search: 0.5 Da

Accession:  
 cds.comp41328\_c2\_seq1\_m.795896

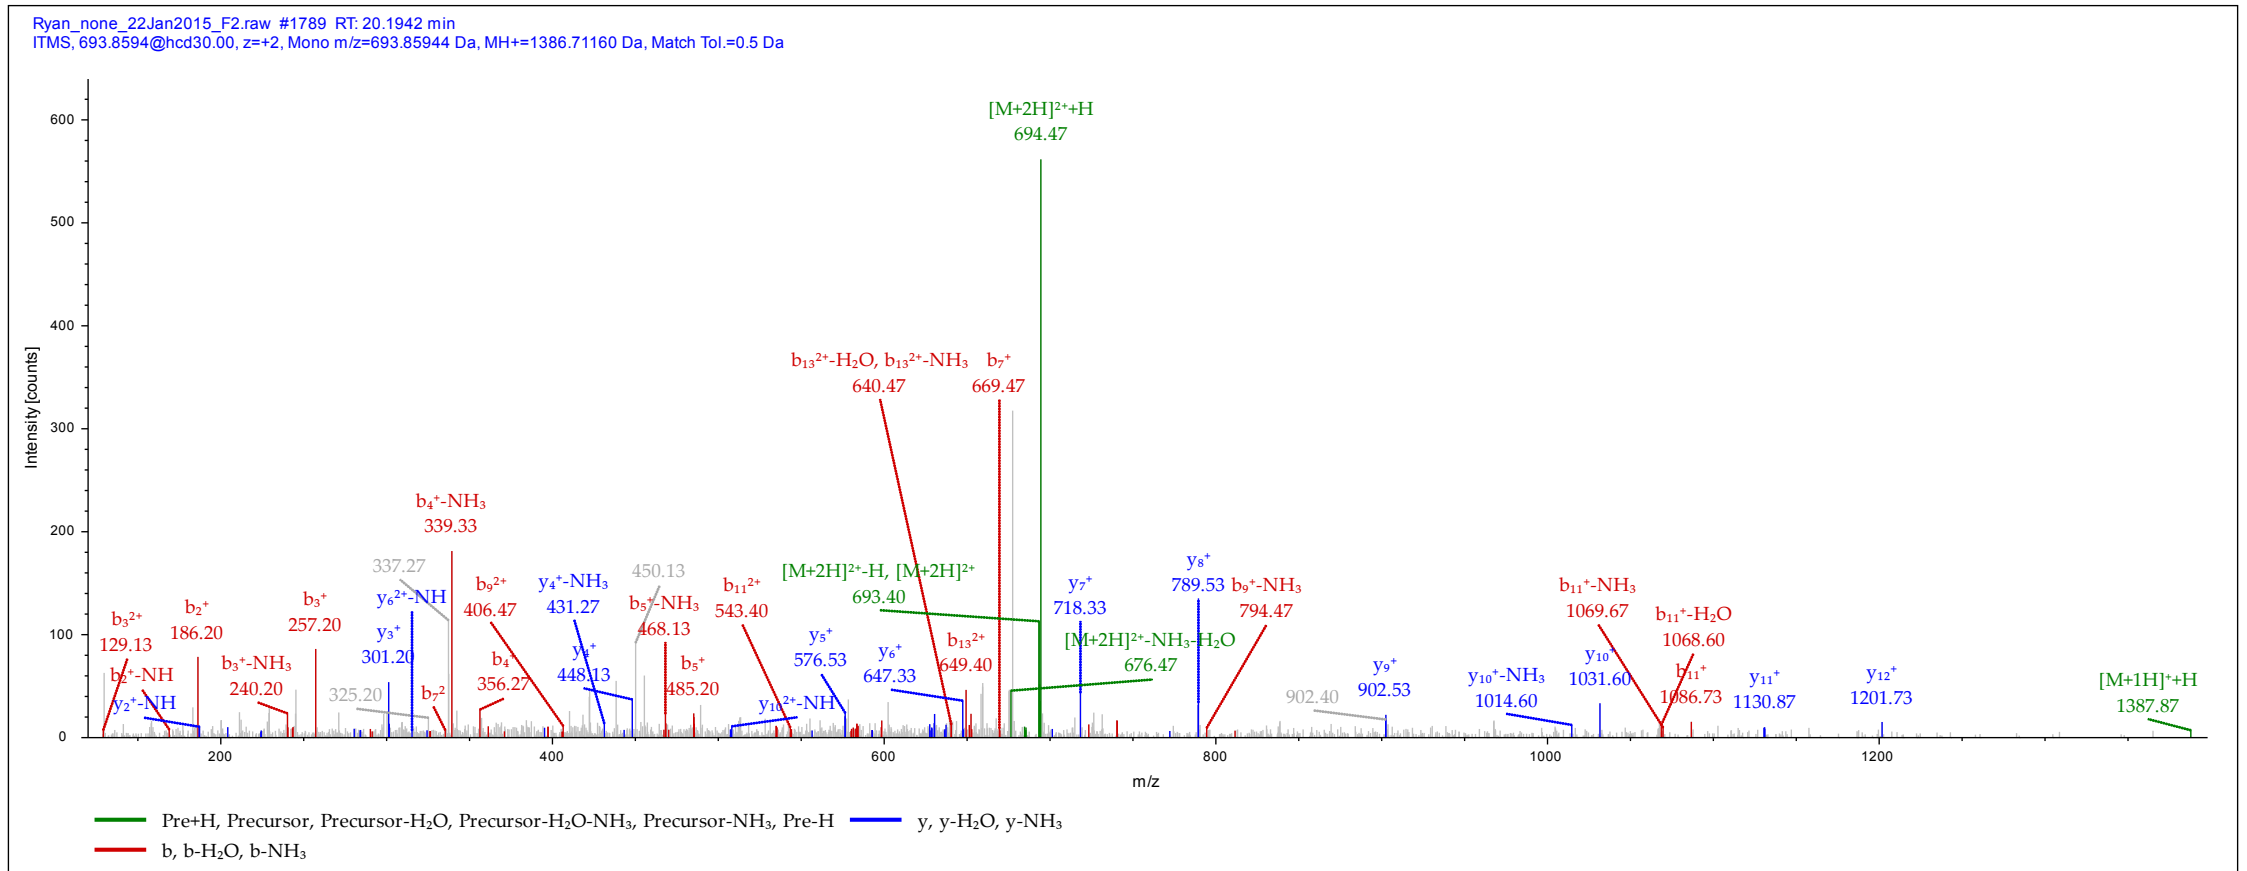

Sequence: FISYEFGPKHDEL, Charge: +3, Monoisotopic m/z: 599.94995 Da (+0.77 mmu/+1.28 ppm), MH+: 1797.83530 Da, RT: 70.7485 min, Identified with: Sequest HT (v1.17); XCorr:2.77, Percolator q-Value:0, Percolator PEP:0.0113, Ions matched by search engine: 0/0 Fragment match tolerance used for search: 0.02 Da

Accession:  
cds.comp6736\_c0\_seq1\_m.22350

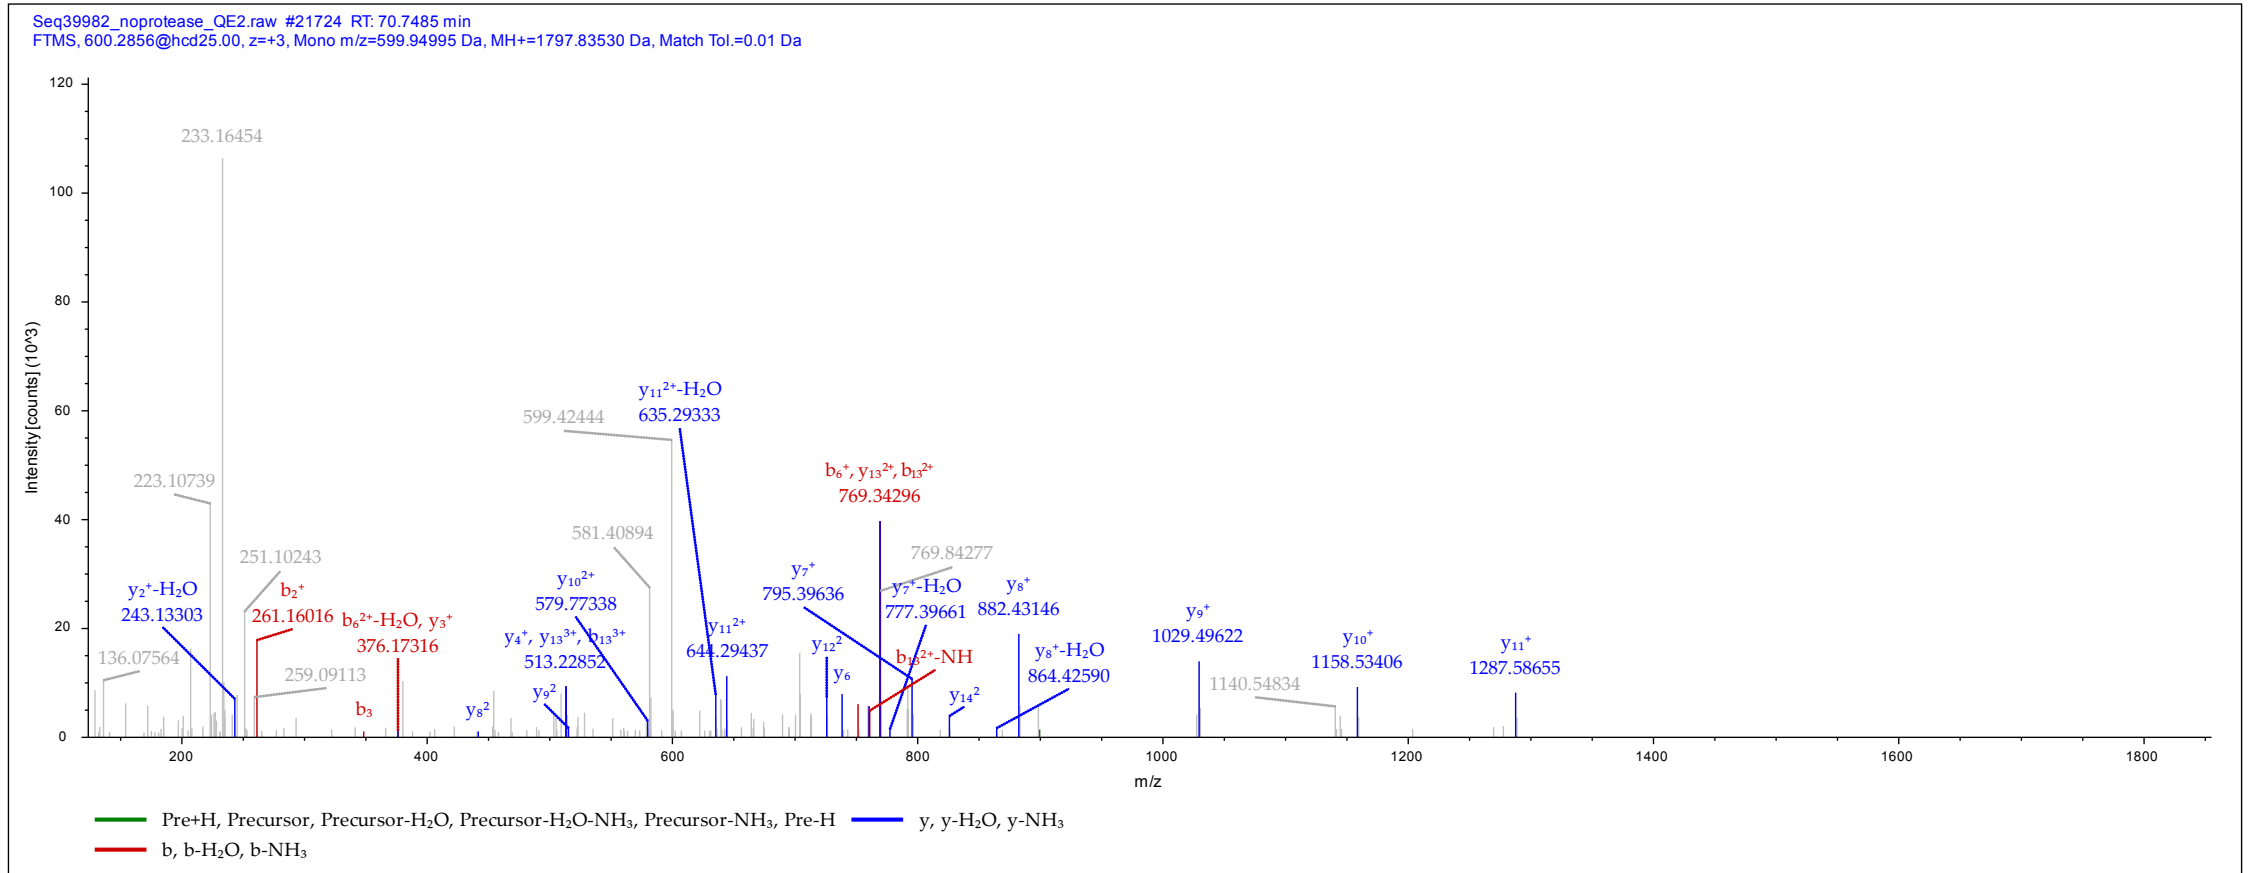



Sequence: YRPGTVALR, Charge: +3, Monoisotopic m/z: 344.87018 Da  
 (+0.36 mmu/+1.06 ppm), MH+: 1032.59598 Da, RT: 18.5691 min,  
 Identified with: Sequest HT (v1.17); XCorr:2.62, Percolator q-Value:0,  
 Percolator PEP:0.0416, Ions matched by search engine: 0/0  
 Fragment match tolerance used for search: 0.5 Da

Accession:  
 cds.comp40326\_c5\_seq2\_m.518076

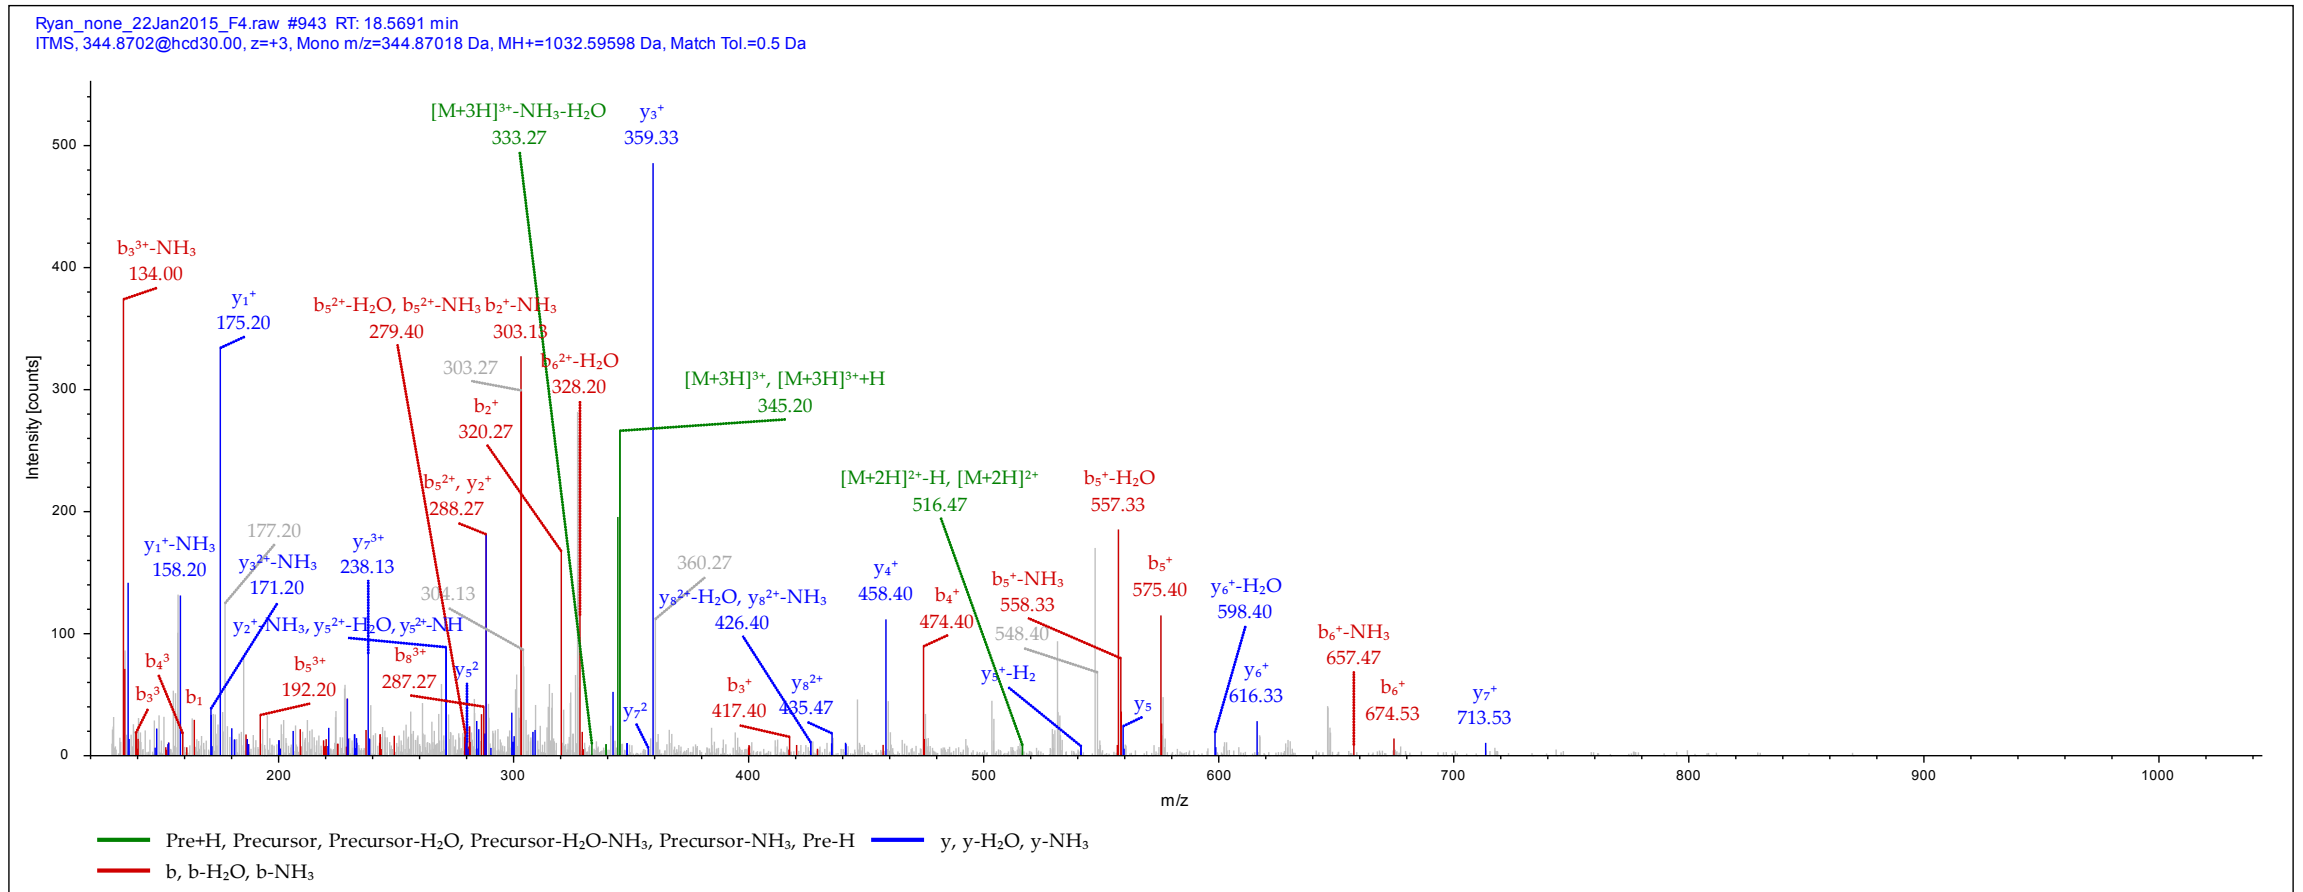

Sequence: HSLPARFSDTALFPR, Charge: +3, Monoisotopic m/z: 572.30621 Da  
 (+0.58 mmu/+1 ppm), MH+: 1714.90409 Da, RT: 67.9199 min,  
 Identified with: Sequest HT (v1.17); XCorr:3.56, Percolator q-Value:0,  
 Percolator PEP:0.000939, Ions matched by search engine: 0/0  
 Fragment match tolerance used for search: 0.02 Da

Accession:  
 cds.comp36819\_c0\_seq5\_m.264920

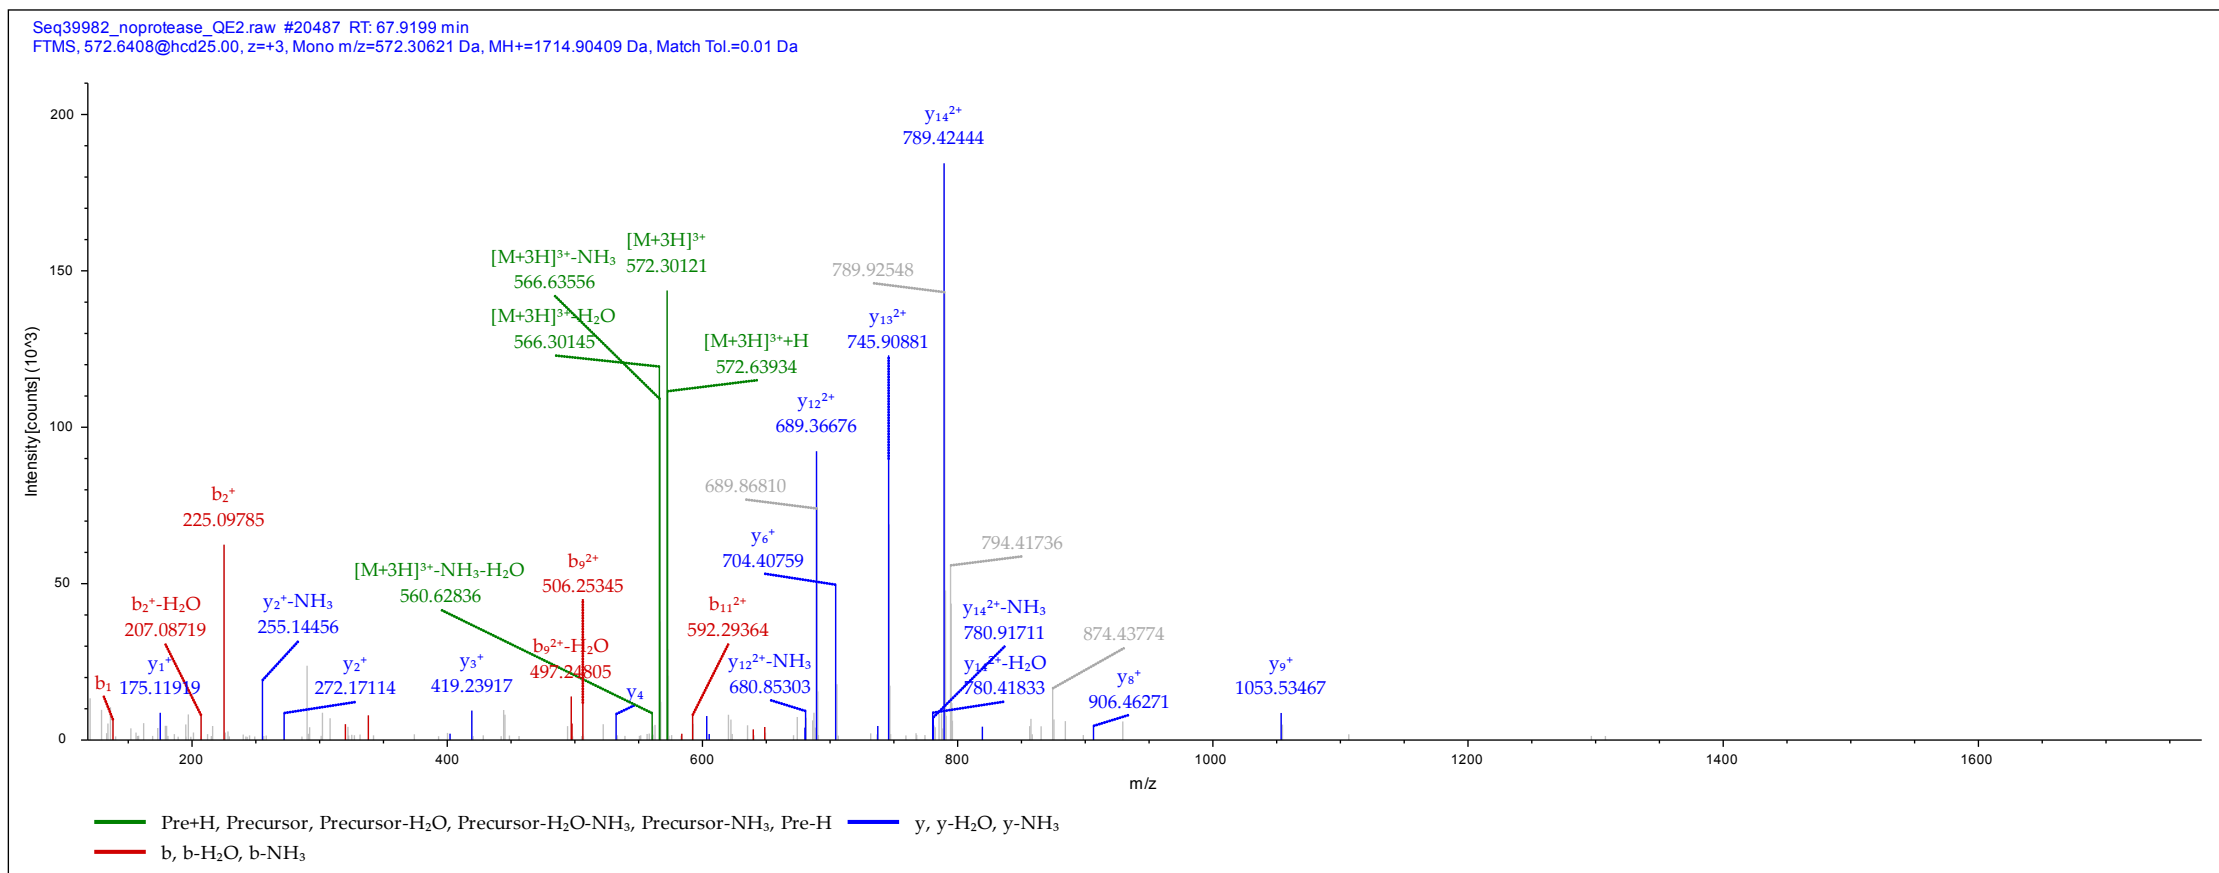

Supplement: 138652_2_supp_209841_pfwd5q.pdf [file 138652_2_supp_209841_pfwd5q.pdf]
