# Supplementary material
Source: PubMed Central journal article supplement (PMC6317478)
Supplement: 138652_2_supp_209842_pf3f53.pdf [file 138652_2_supp_209842_pf3f53.pdf]

1 Supplementary Figures and Legends for: “Parasitoid Jewel Wasp Mounts Multi-Pronged  
2 Neurochemical Attack to Hijack a Host Brain”  
3  
4 Ryan Arvidson, Maayan Kaiser, Sang Soo Lee, Jean-Paul Urenda, Christopher Dail, Haroun  
5 Mohammed, Cebrina Nolan, SongQin Pan, Jason E. Stajich, Frederic Libersat, Michael E. Adams.  
6

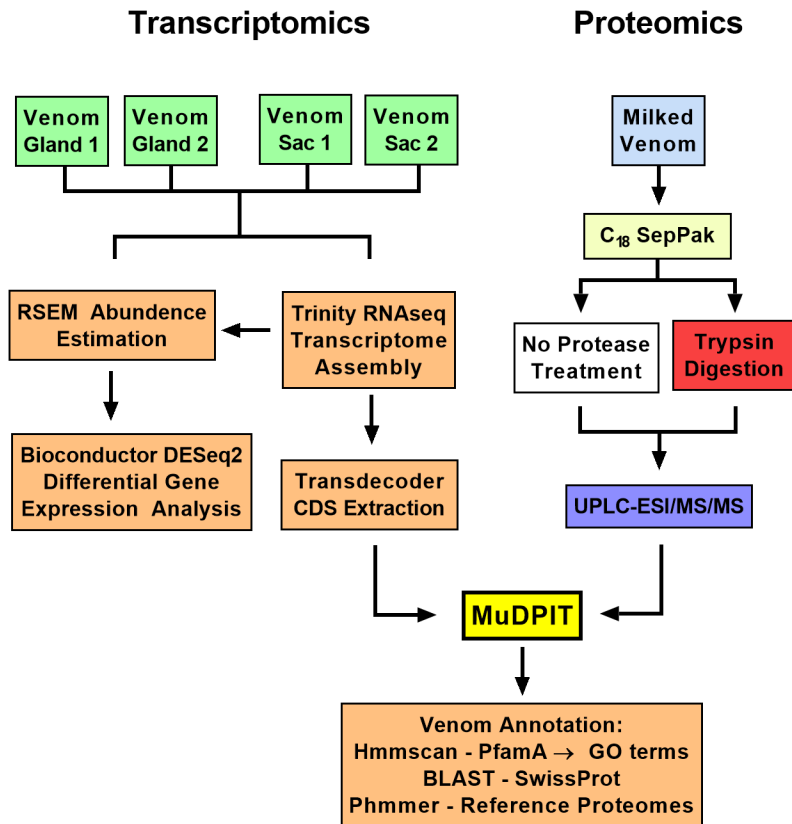

7

8

9 **Figure S1. Experimental Design.** Transcriptomics: RNA was sequenced from two distinct  
 10 components (the venom gland and the venom sac) of the venom apparatus in biological and  
 11 technical replicates. RNA sequencing reads were combined and assembled into a transcriptome  
 12 using the Trinity pipeline. Transcript levels for each replicate were estimated using RSEM, and  
 13 differential gene expression analysis between tissue types was examined using DEseq plugins for  
 14 Trinity. Probable coding sequences were extracted from the transcriptome by Transdecoder.  
 15 Proteomics: Protein was C<sub>18</sub> SepPak-purified, concentrated by Speed-Vac, and analyzed by mass  
 16 spectrometry, either by trypsinizing the sample, or direct analysis. Venom and venom apparatus  
 17 proteins were identified by multiple dimension protein identification technology (MudPIT)  
 18 analysis using MASCOT interrogation of the Transdecoder database with mass spectrometry  
 19 data. Identified proteins were annotated using Hmmscan against PfamA, also from which GO  
 20 terms were extracted; by BLAST against SwissProt database; and by Phmmer, against Uniprot's  
 21 reference proteomes.  
 22

23

24

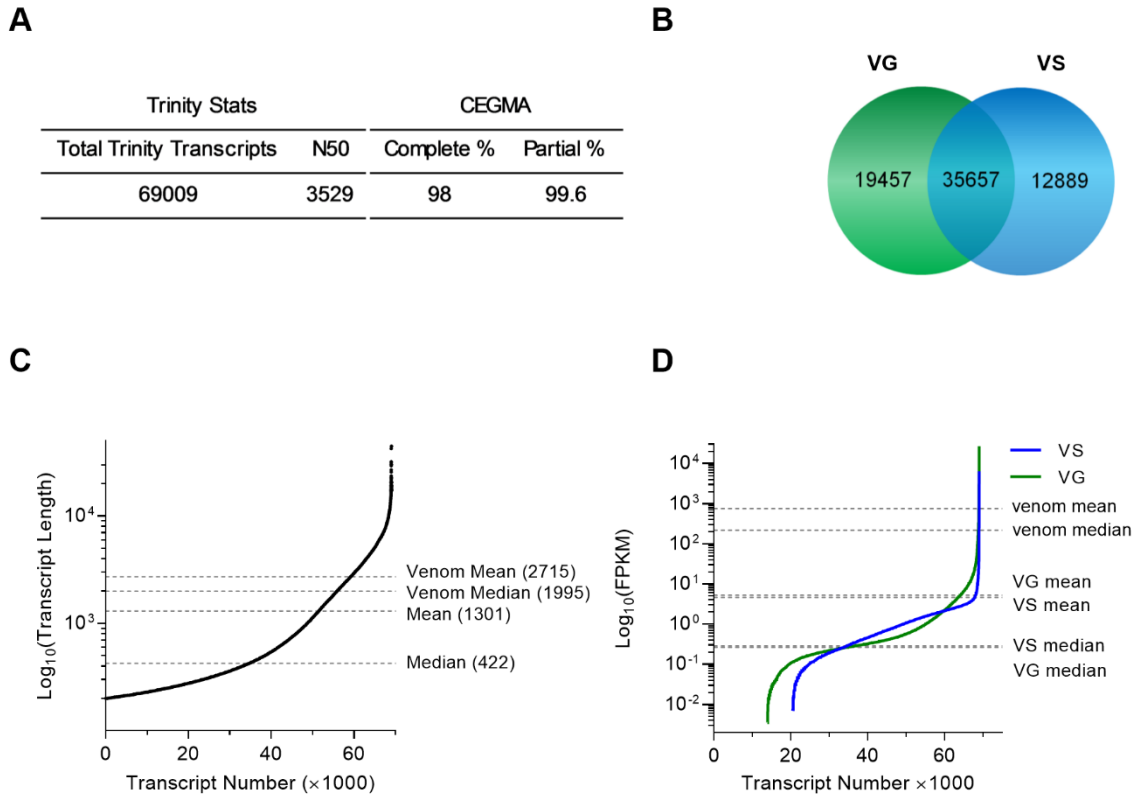

25

26 **Figure S2. *A. compressa* venom apparatus transcriptome statistics.**

27 **A.** Transcriptome assembly statistics and CEGMA analysis of assembly completeness. Trinity  
 28 assembly generated 69009 transcripts. Core Eukaryotic Gene Mapping Approach (CEGMA)  
 29 identified 98 ultra-conserved, core eukaryotic genes (CEGs) indicating completeness of the  
 30 assembly. **B.** Venn diagram of quantifiable transcripts found only in the VG, only in the VS, and  
 31 transcripts common to both. Of the 35,657 transcripts shared between tissue types only 2,222 are  
 32 differentially expressed. **C.** Transcript length in base-pairs by transcript number. Transcripts range  
 33 in length from 200 (assembly minimum) to 44,751 bp. Venom-specific transcripts tend to be longer  
 34 on average than the mean assembled transcript length. **D.** Transcript abundance estimation as  
 35 fragments per kilobase per million mapped reads (FPKM) by transcript number. The average  
 36 transcript abundance for identified venom transcripts (mean = 756) is two orders of magnitude  
 37 higher than the average for all transcripts (VS mean = 4.61, VG mean = 5.21)

38

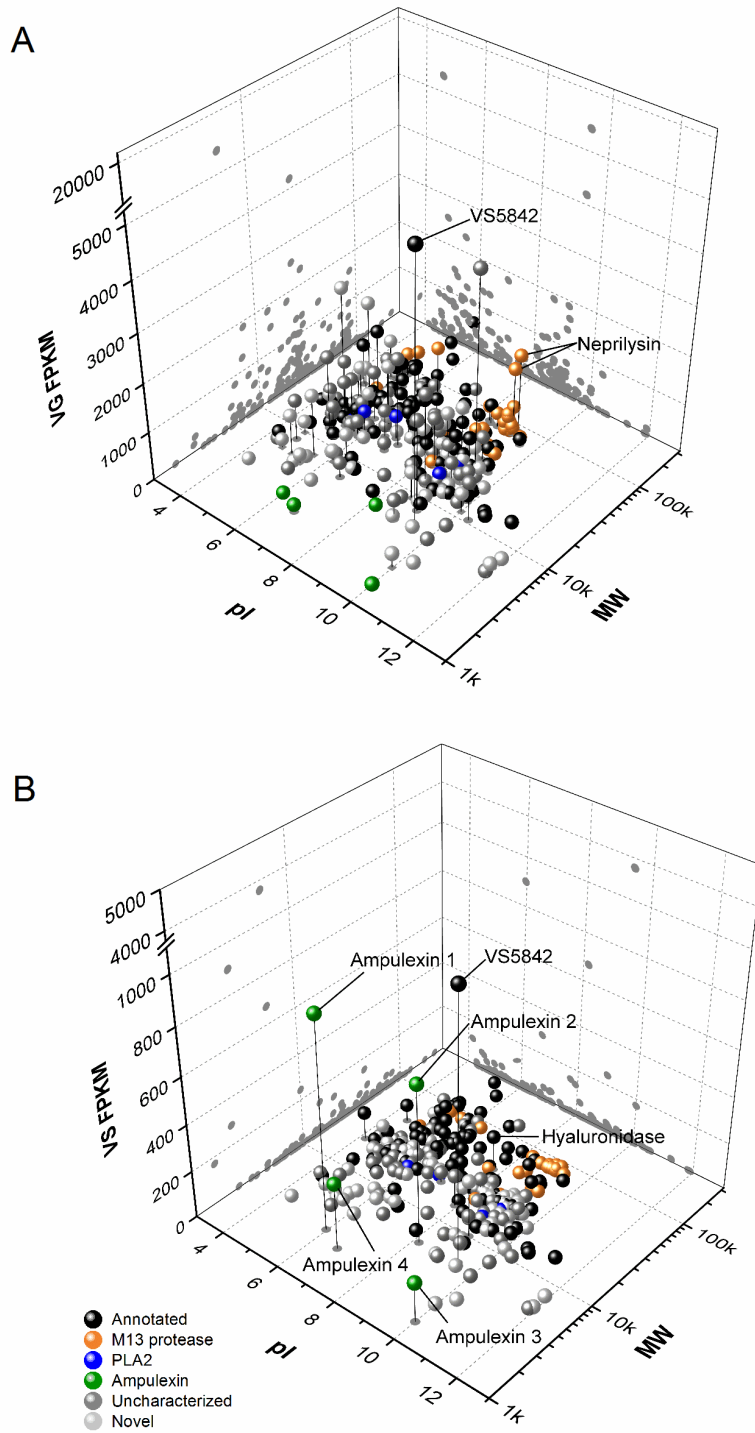

39

40

41

**42 Figure S3. 3D ‘gel’ analysis of the venom proteome by gland expression**

43 Theoretical values of isoelectric point (pI) and molecular weight (MW) of venom proteins plotted  
44 against relative abundance of transcripts (FPKM, fragments per kilobase per million mapped  
45 reads). **A.** Venom proteins plotted against venom gland (VG) transcript abundance. **B.** Venom  
46 proteins plotted against venom sac (VS) transcript abundance. The theoretical gel results correlate  
47 with the 1D SDS-PAGE (Figure 2B) with higher molecular weight protein expression in the venom  
48 gland and higher expression of low molecular peptides in the venom sac. The M13 family  
49 peptidases (red) and phospholipase A2 (blue) fall onto similar mass ranges but different pI's. The  
50 most abundantly expressed venom proteins in each gland are highlighted; notably M13 peptidases  
51 (neprilysin in the venom gland, and hyaluronidase, serpin, and the ampulexin peptides in the  
52 venom sac. VS5842 is highly expressed in both glands. All other proteins identified in global  
53 databases are in black. Uncharacterized proteins (grey) are differentiated from novel proteins  
54 (white) in that uncharacterized proteins were found represented in NCBI-nr database as “putative”  
55 or “uncharacterized”, whereas novel proteins did not return any significant hits ( $E\text{-value} < 10^{-5}$ )  
56 from Uniprot, or PfamA databases.

57

58

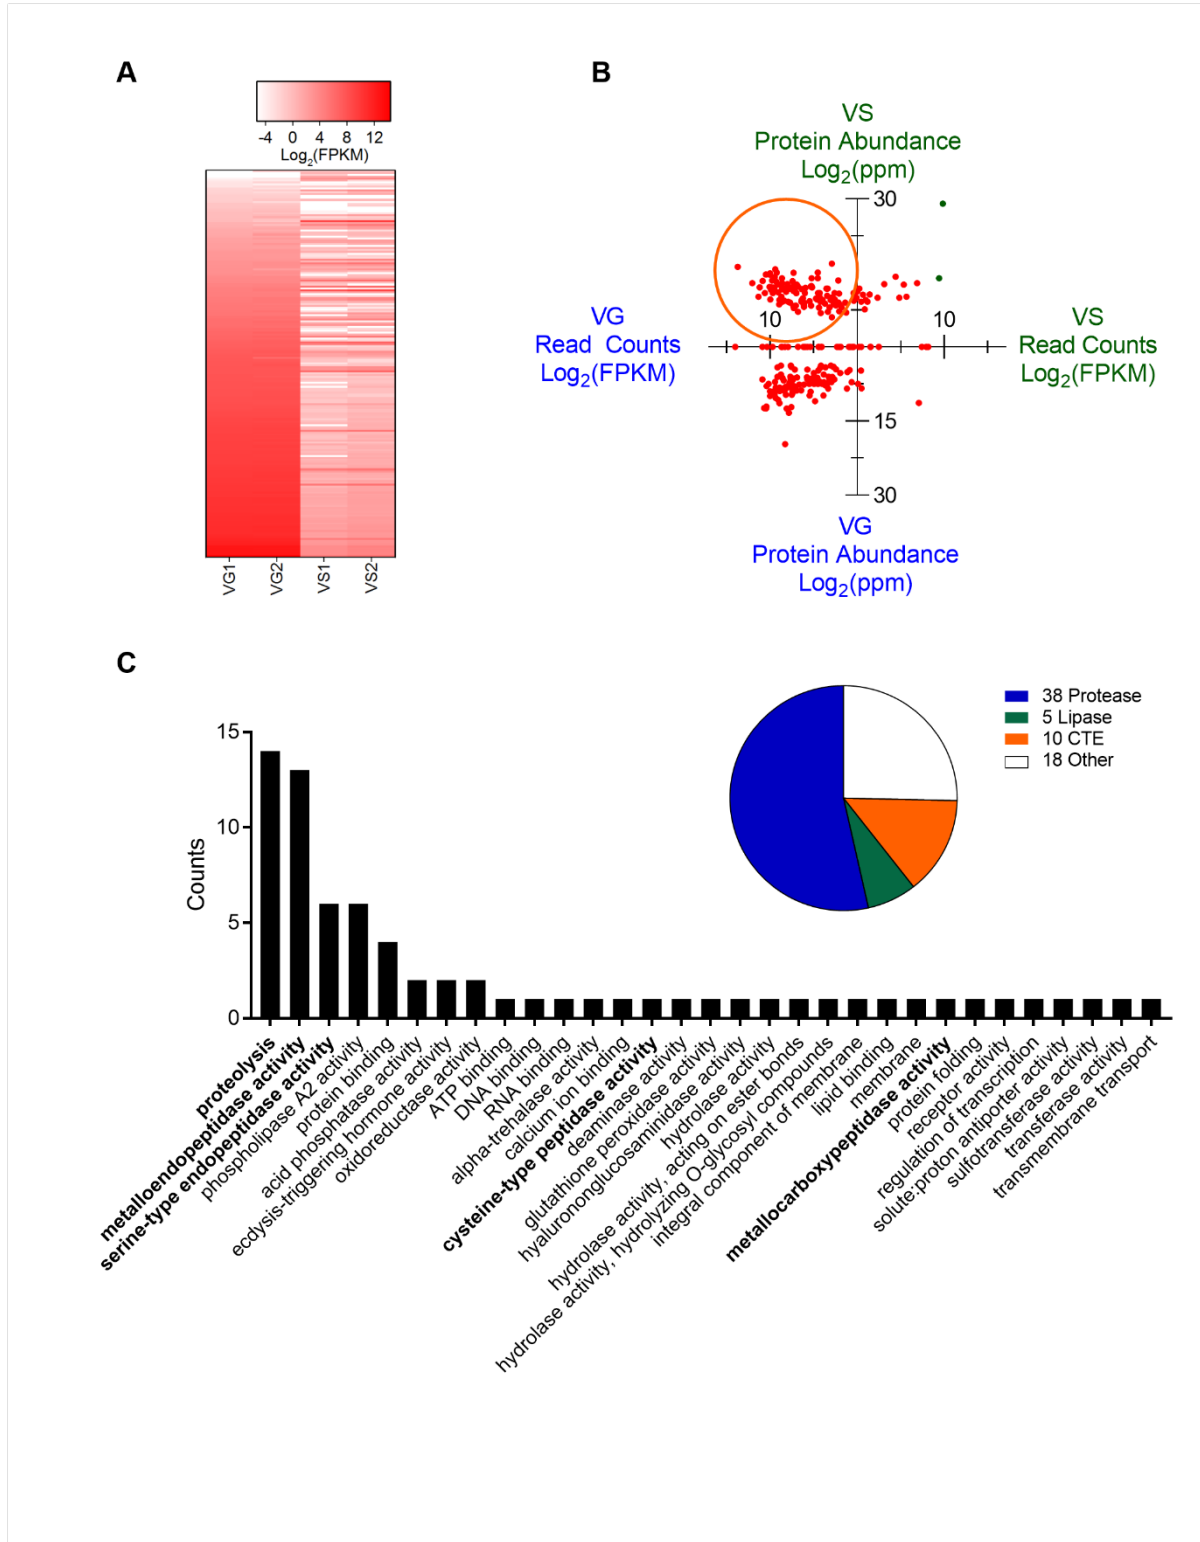

**60 Figure S4. Bioinformatic analysis of the venom proteome.**

61 **A.** Heat map representing  $\text{Log}_2$  fold change in transcript abundance of 201 mass spectrometry  
62 identified venom transcripts between venom gland (VG) and venom sac (VS) sorted by VG1 form  
63 low to high. **B.** Venom transcript read counts and protein abundance per tissue type. For each  
64 venom protein identified in extracts of the venom gland or venom sac, transcript abundance  
65 (FPKM) is plotted vs protein abundance; emPAI values for VG and VS were normalized as parts-  
66 per-million (ppm) of the total for each tissue. On the axis of which the values are greatest, such  
67 that if both FPKM and protein abundance values are greatest in the venom sac, it would be plotted  
68 in quadrant 1, or if greater in the venom gland, plotted in quadrant 3. In a case where expression  
69 is greater in the venom gland, but protein abundance is greater in the venom sac, these values  
70 would appear in quadrant 2, and the converse plotted in quadrant 4. Clustering of values in  
71 quadrant 2 (orange circle) is consistent with the hypothesis that the majority of venom proteins are  
72 expressed in the venom gland, and stored in the venom sac. Green points in quadrant 1 are  
73 ampulexins, which we show in this work to be more highly expressed in the venom sac than venom  
74 gland. **C.** Hierarchical distribution of GO terms associated with identified venom proteins. The  
75 venom proteome contains representatives of many protein activities, but proteases are a dominant  
76 fraction. The pie chart summarizes and represents venom proteins with enzymatic activity by broad  
77 enzymatic classification. Protease activity is the dominant activity, representing more than half of  
78 venom GO terms. Proteases in the venom include serine, cysteine, and metalloproteases. A  
79 significant fraction of enzyme activity target carbohydrates or glycans as substrates and are  
80 referred to as carbohydrate-targeting-enzymes (CTE). Lipases include almost exclusively  
81 phospholipase A2 isoforms, which may not have lipase activity.

82

83

84

85

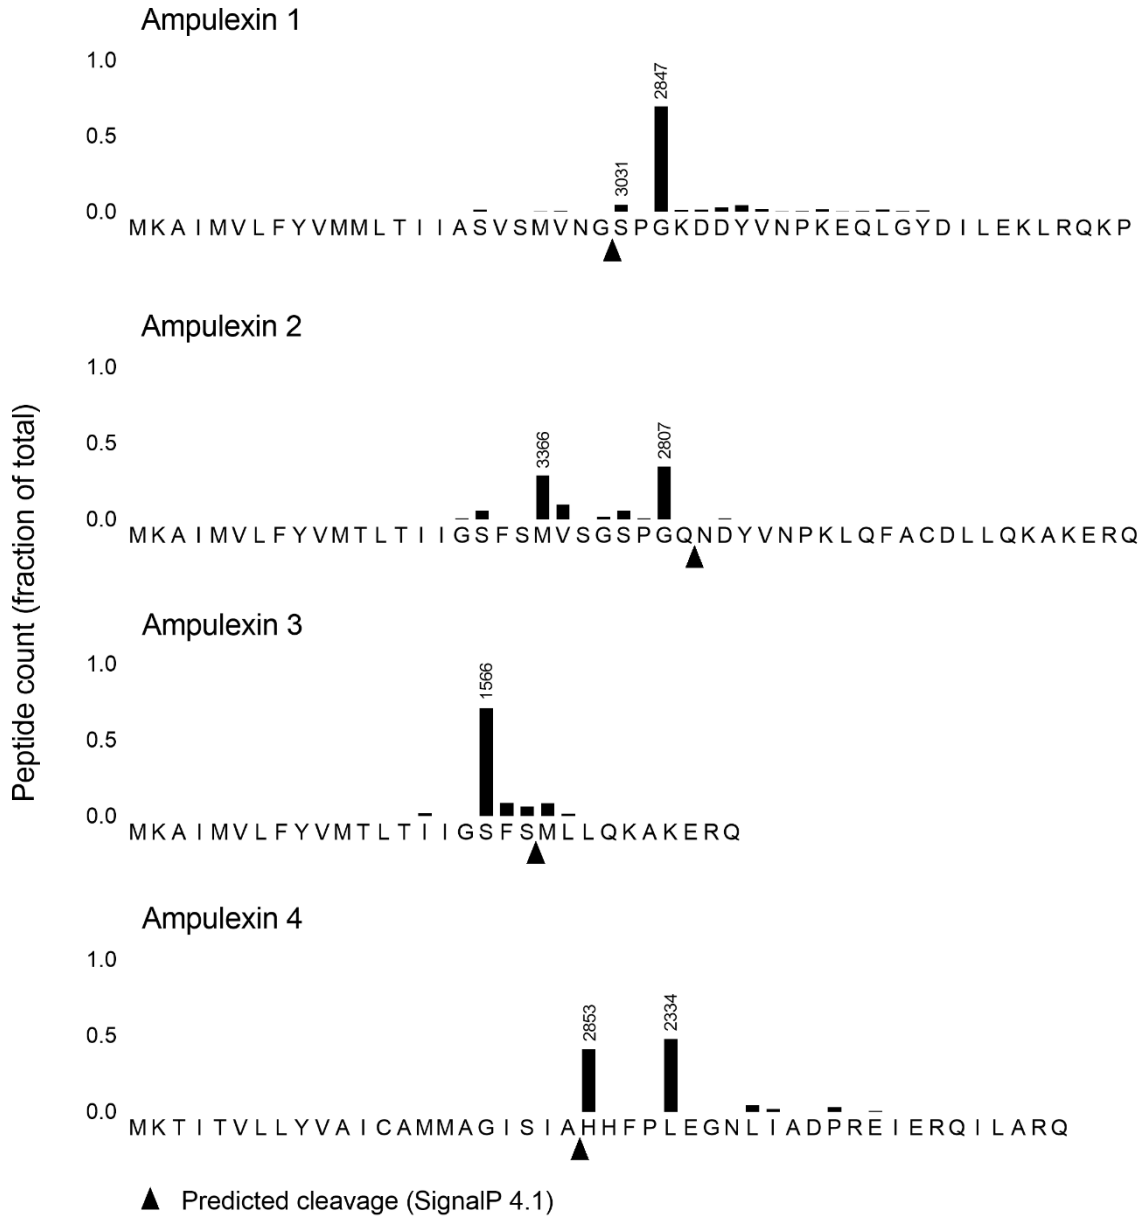

86

87 **Figure S5. Ampulexin peptide counts and signal cleavage**

88 The ampulexin family peptides cleavage sites as identified by mass spectrometry. The relative  
 89 abundance of a peptide's spectral count is plotted as a histogram above the most N-terminal residue  
 90 of the detected peptide. Predicted cleavage sites are indicated with an arrow. The molecular mass  
 91 of the peptide is given above the histogram.

92



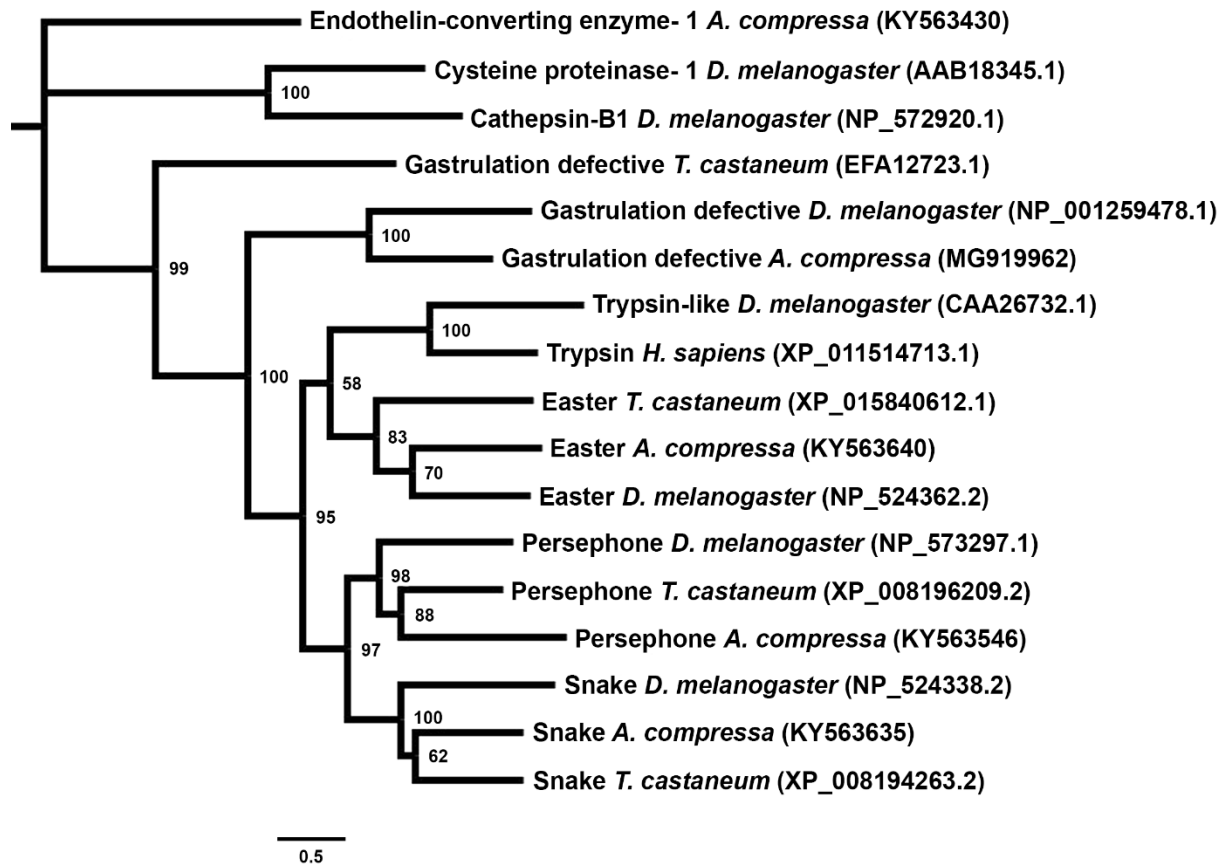

93

94

95 **Figure S6: Maximum-likelihood phylogenetic analysis of the Spätzle activation cascade**

96 Venom serine proteases involved in activation of the Toll ligand Spätzle cluster with their  
 97 respective homologs in *Drosophila* and *Tribolium*. Spätzle is activated by a protease cascade  
 98 beginning with Easter, which is activated by Snake, which in turn is activated by Gastrulation  
 99 defective. Persephone is also known to be involved in a separate activation cascade of Spätzle.  
 100 Cysteine proteinase-1, Cathepsin-B (a cysteine protease), and endothelin-converting enzyme (a  
 101 zinc protease) were used as outgroups. Supports are bootstrap values. NCBI accession numbers  
 102 are in parentheses.

103

104

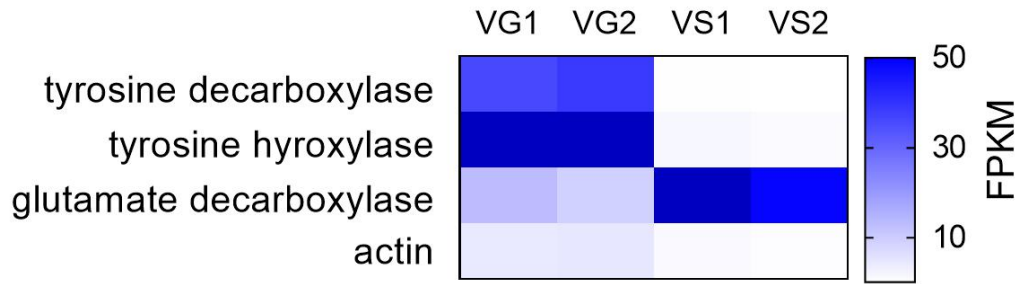

105

106 **Figure S7: Expression of dopamine and GABA synthesis enzymes in the venom apparatus.**

107 The VG and VS appear to differentially synthesize known venom components dopamine and

108 GABA. Read counts of enzymes in the biosynthetic pathway of dopamine, tyrosine

109 decarboxylase and tyrosine hydroxylase, are expressed highly in the VG, but not in the VS.

110 Conversely, the biosynthetic enzyme that generates GABA from glutamate, glutamate

111 decarboxylase, is highly expressed in the venom sac, but not the venom gland.

112

113

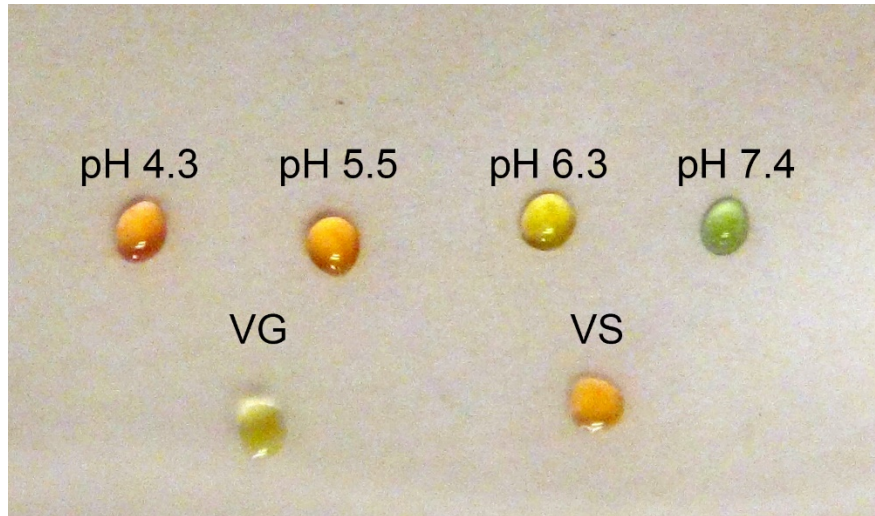

114

115

116 **Figure S8. Venom sac contents are acidic**

117 Phosphate-buffered saline at varying pH values was used as reference standards with a universal  
118 pH indicator solution (top row). Venom sac (VS) contents are acidic with respect to venom gland  
119 contents (VG).

120
